# Supplementary material for: A statistical method for single sample analysis of HumanMethylation450 array data: genome-wide methylation analysis of patients with imprinting disorders
Source: PubMed Central journal article supplement (PMC4410592; doi:10.1186/s13148-015-0081-5), 2015-04-21
Supplement: 13148_2015_81_MOESM1_ESM.pdf [file 13148_2015_81_MOESM1_ESM.pdf]

## Supplementary Figures and Tables

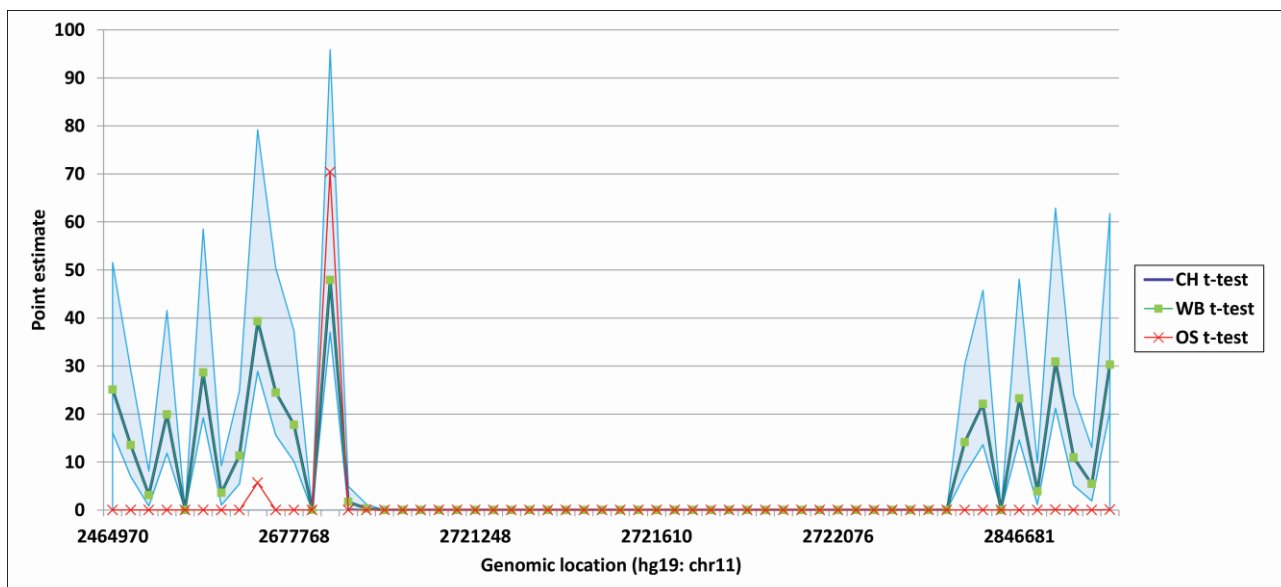

**Supplementary Figure 1.** The performance of three t-tests (one-sample, Weisberg, Crawford-Howell t-tests) around the *KCNQ1OT1* region in BWS-MLMD3. The x-axis denotes the genomic location of *KCNQ1OT1* on chromosome 11. The y-axis represents the estimated percentage of the control population that would be expected to obtain lower score than the case (point estimate), which is calculated according to the one-sample (OS, red crossed line), Weisberg (WB, green line with green square markers) and Crawford-Howell (CH, blue line) methods. The blue shade represents 95% confidence interval point estimates from the noncentrality parameter from a noncentral t-distribution.

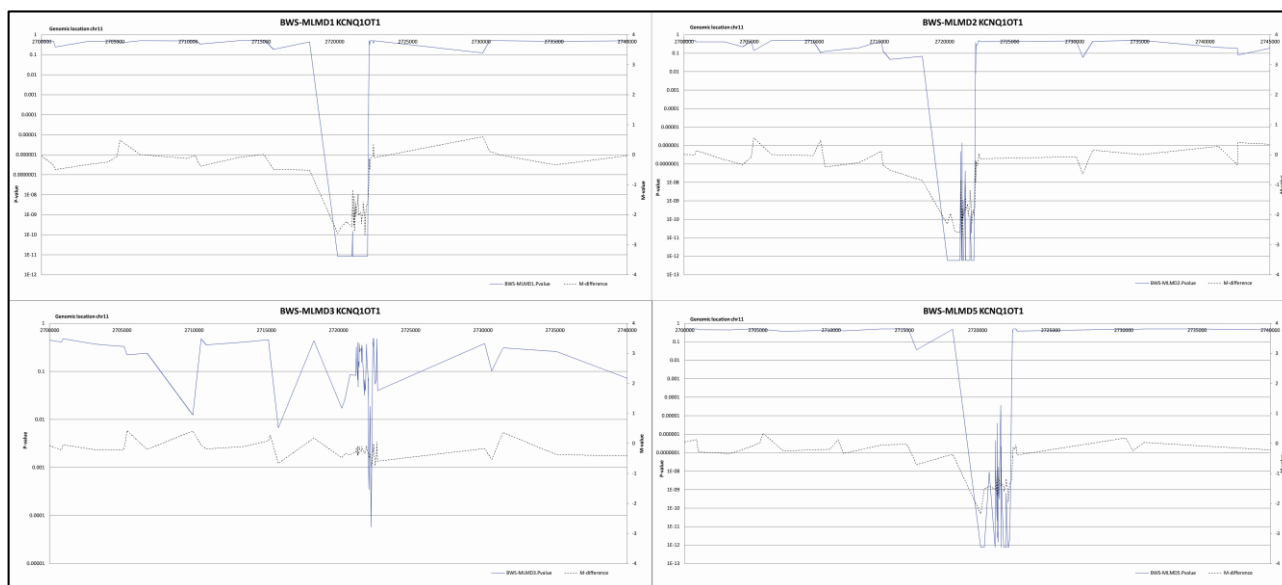

**Supplementary Figure 2.** Identification of hypomethylation at the cardinal loci (*KCNQ1OT1*) in four BWS-MLMD samples. Graphical presentation of 450k DNA methylation data across the *KCNQ1OT1* gene in BWS-MLMDs1, 2, 3, and 5. The x-axis corresponds to the genomic location at chr11 (hg19). The primary y-axis (left) represents the CH P-value (solid blue line); the secondary y-axis (right) represents the difference in M value between BWS-MLMD cases and controls (dashed black line).

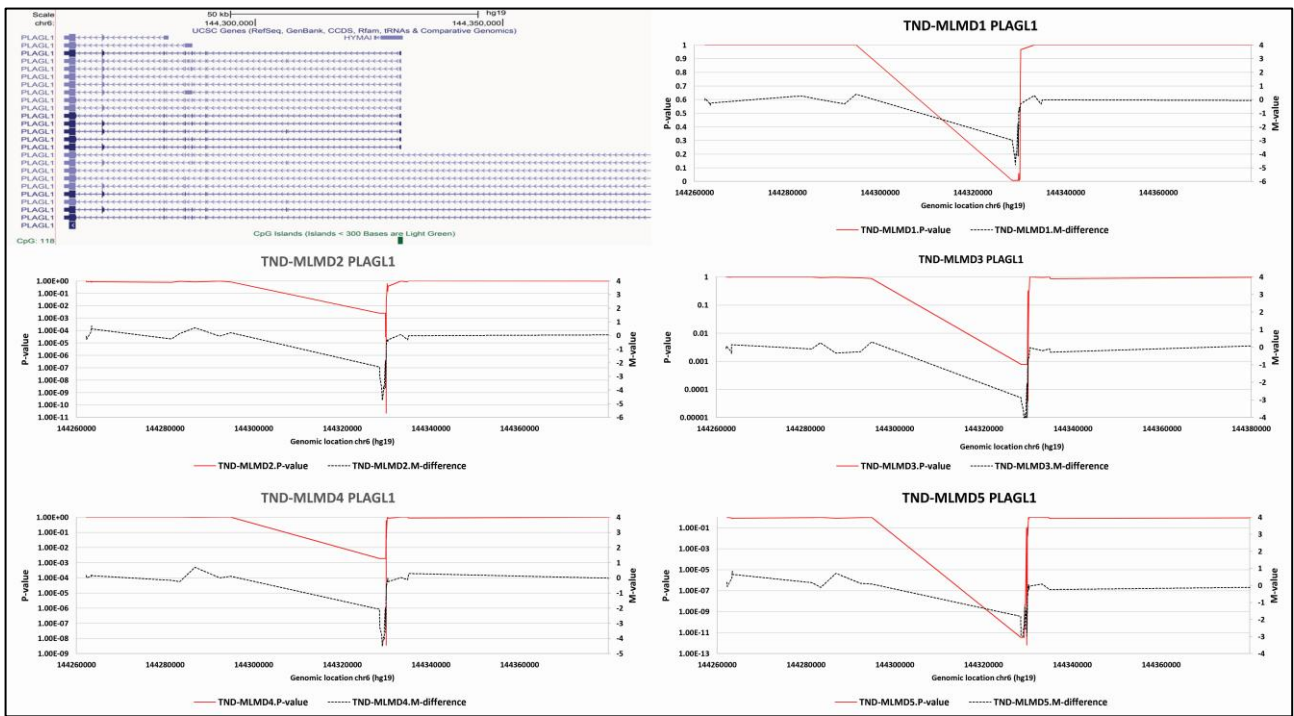

**Supplementary Figure 3. Identification of hypomethylation at the cardinal loci (PLAGL1) in five TND-MLMD samples.** Upper leftmost figure: Genomic location from the UCSC genome browser, illustrating the PLAGL1 gene and the imprinting control region. Five other figures: graphical presentation of 450k DNA methylation data across the PLAGL1 gene in TND-MLMDs 1-5. The x-axis corresponds to the genomic location as illustrated in the upper panel. The primary y-axis (left) represents the CH P-value (solid red line); the secondary y-axis (right) represents the difference in M value between TND-MLMD cases and controls (dashed black line).

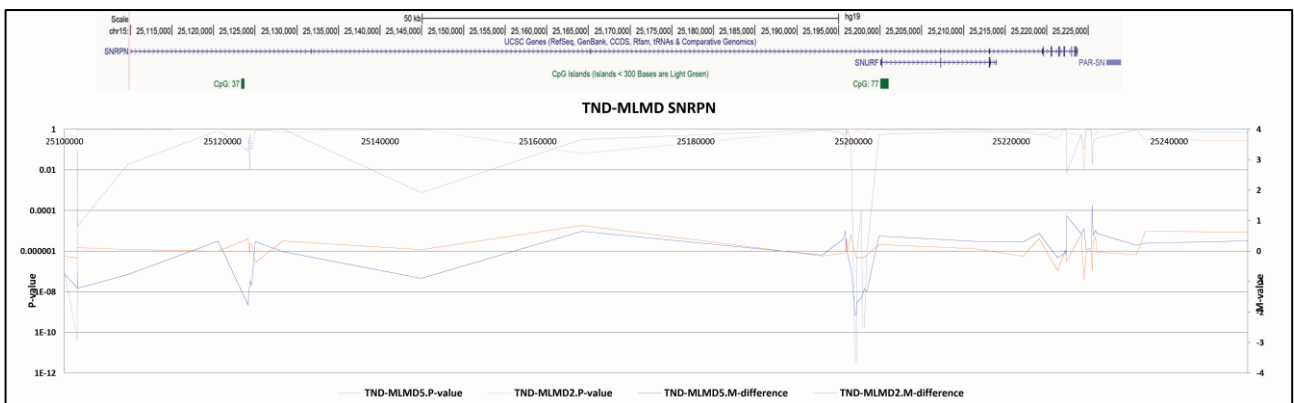

**Supplementary Figure 4. Identification of hypomethylation at additional loci (SNRPN) in TND-MLMD2 and TND-MLMD5.** Upper panel: Genomic location from the UCSC genome browser, illustrating the SNRPN gene and the imprinting control region. Lower panel: graphical presentation of 450k DNA methylation data across the SNRPN gene in TND-MLMD2 (red) and TND-MLMD5 (blue). The x-axis corresponds to the genomic location as illustrated in the upper panel. The primary y-axis (left) represents the CH P-value (solid lines); the secondary y-axis (right) represents the difference in M value between the cases and controls (dashed lines).

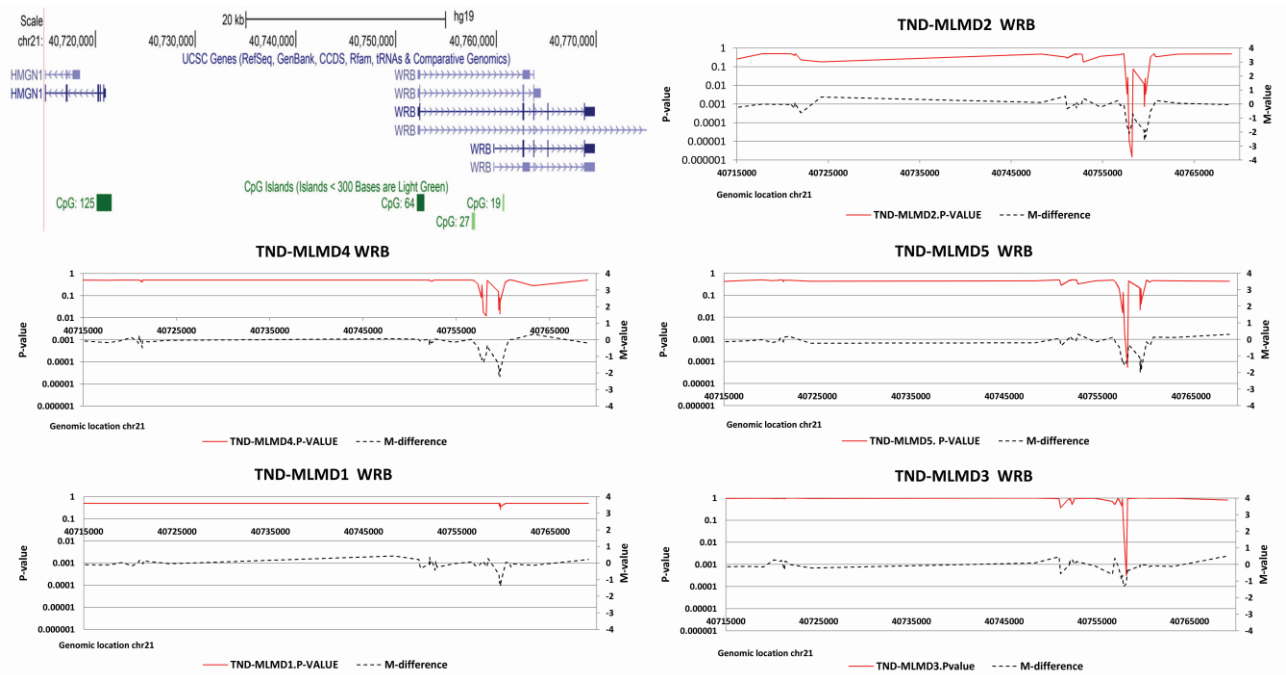

**Supplementary Figure 5. Identification of hypomethylation at WRB region in five TND-MLMD samples.** Upper leftmost figure: Genomic location from the UCSC genome browser, illustrating the WRB gene and the imprinting control region. Five other figures: graphical presentation of 450k DNA methylation data across the WRB gene in TND-MLMDs 1-5. The x-axis corresponds to the genomic location as illustrated in the upper panel. The primary y-axis (left) represents the CH P-value (solid red line); the secondary y-axis (right) represents the difference in M value between TND-MLMD cases and controls (dashed black line).

**Supplementary Table 1. Genomic regions shared between TND-MLMD and BWS-MLMD cases, as identified by the single sample analysis pipeline.** Tables 1(a) and 1(b) represent the results for the five TND-MLMD and five BWS-MLMD cases against 50 controls respectively. Probes with M-values between -1 and +1 in controls and relative hypomethylation in patients with a p-values of <0.05 were identified. This subset was further filtered by minimal criteria for a hypomethylated locus, that is, a minimum 3 consecutive hypomethylated probes spaced by <2000 nucleotides. Candidate regions that meet these criteria in both TND-MLMD and BWS-MLMD cases are listed in the tables.

**(1a) TND-MLMDs**

| TND-MLMD1               | TND-MLMD2               | TND-MLMD3           | TND-MLMD4            | TND-MLMD5               |
|-------------------------|-------------------------|---------------------|----------------------|-------------------------|
| <i>DIRAS3</i>           | <i>DIRAS3</i>           | <i>DIRAS3</i>       | <i>DIRAS3</i>        | <i>DIRAS3</i>           |
| <i>HYMAI;PLAGL1</i>     | <i>HYMAI;PLAGL1</i>     | <i>HYMAI;PLAGL1</i> | <i>HYMAI;PLAGL1</i>  | <i>HYMAI;PLAGL1</i>     |
| <i>JAKMIP1</i>          | <i>JAKMIP1</i>          |                     | <i>JAKMIP1</i>       | <i>JAKMIP1</i>          |
| <i>ERLIN2;LOC728024</i> | <i>ERLIN2;LOC728024</i> |                     |                      | <i>ERLIN2;LOC728024</i> |
| <i>LOC100130522</i>     | <i>LOC100130522</i>     | <i>LOC100130522</i> | <i>LOC100130522</i>  | <i>LOC100130522</i>     |
| <i>IGF1R</i>            | <i>IGF1R</i>            | <i>IGF1R</i>        |                      | <i>IGF1R</i>            |
|                         | <i>WRB</i>              | <i>WRB</i>          | <i>WRB</i>           | <i>WRB</i>              |
| <i>FAM50B</i>           | <i>FAM50B</i>           | <i>FAM50B</i>       |                      | <i>FAM50B</i>           |
| <i>KCNQ1;KCNQ1OT1</i>   |                         |                     |                      |                         |
| <i>MEST;MESTIT1</i>     | <i>MEST;MESTIT1</i>     |                     | <i>MEST;MESTIT1</i>  |                         |
| <i>ZNF331</i>           | <i>ZNF331</i>           |                     |                      | <i>ZNF331</i>           |
|                         | <i>NHP2L1</i>           | <i>NHP2L1</i>       | <i>NHP2L1</i>        | <i>NHP2L1</i>           |
| <i>L3MBTL</i>           | <i>L3MBTL</i>           | <i>L3MBTL</i>       |                      |                         |
|                         | <i>HM13;PSIMCT-1</i>    |                     | <i>HM13;PSIMCT-1</i> |                         |
|                         | <i>GNAS;GNASAS</i>      |                     |                      |                         |
|                         | <i>GLP2R</i>            |                     |                      | <i>GLP2R</i>            |
|                         | <i>GRB10</i>            |                     |                      | <i>GRB10</i>            |
|                         |                         | <i>SVOPL</i>        |                      |                         |
|                         | <i>PEG10;SGCE</i>       | <i>PEG10;SGCE</i>   |                      |                         |
|                         | <i>NPAS3</i>            |                     |                      | <i>NPAS3</i>            |
|                         | <i>SNRPN;SNURF</i>      |                     |                      | <i>SNRPN;SNURF</i>      |
|                         | <i>RB1</i>              |                     |                      | <i>RB1</i>              |
|                         |                         |                     |                      | <i>MAGEL2</i>           |
|                         |                         |                     |                      | <i>SEPT8</i>            |
|                         | <i>SEPT9</i>            |                     |                      |                         |
|                         | <i>PEG10</i>            |                     |                      |                         |
|                         | <i>RBMXL2</i>           |                     |                      |                         |
|                         | <i>PTCHD3</i>           |                     |                      |                         |
|                         | <i>SLC5A1</i>           |                     |                      |                         |
| <i>TNRC6C</i>           |                         |                     |                      |                         |
|                         | <i>PRAP1</i>            |                     |                      |                         |
|                         | <i>FRMD4A</i>           |                     |                      |                         |
|                         | <i>C1QTNF8</i>          |                     |                      |                         |
|                         |                         |                     |                      |                         |

**(1b) BWS-MLMDs**

| BWS-MLMD1             | BWS-MLMD2               | BWS-MLMD3               | BWS-MLMD4               | BWS-MLMD5               |
|-----------------------|-------------------------|-------------------------|-------------------------|-------------------------|
| <i>DIRAS3</i>         | <i>DIRAS3</i>           | <i>DIRAS3</i>           | <i>DIRAS3</i>           | <i>DIRAS3</i>           |
| <i>HYMAI;PLAGL1</i>   | <i>HYMAI;PLAGL1</i>     | <i>HYMAI;PLAGL1</i>     |                         |                         |
|                       | <i>JAKMIP1</i>          | <i>JAKMIP1</i>          | <i>JAKMIP1</i>          |                         |
|                       | <i>ERLIN2;LOC728024</i> | <i>ERLIN2;LOC728024</i> | <i>ERLIN2;LOC728024</i> | <i>ERLIN2;LOC728024</i> |
|                       | <i>LOC100130522</i>     | <i>LOC100130522</i>     |                         |                         |
|                       |                         | <i>IGF1R</i>            | <i>IGF1R</i>            | <i>IGF1R</i>            |
| <i>WRB</i>            | <i>WRB</i>              | <i>WRB</i>              | <i>WRB</i>              |                         |
|                       | <i>FAM50B</i>           |                         |                         | <i>FAM50B</i>           |
| <i>KCNQ1;KCNQ10T1</i> | <i>KCNQ1;KCNQ10T1</i>   | <i>KCNQ1;KCNQ10T1</i>   | <i>KCNQ1;KCNQ10T1</i>   | <i>KCNQ1;KCNQ10T1</i>   |
| <i>MEST;MESTIT1</i>   | <i>MEST;MESTIT1</i>     | <i>MEST;MESTIT1</i>     |                         |                         |
| <i>ZNF331</i>         | <i>ZNF331</i>           |                         | <i>ZNF331</i>           |                         |
|                       | <i>NHP2L1</i>           |                         |                         | <i>NHP2L1</i>           |
|                       | <i>L3MBTL</i>           |                         | <i>L3MBTL</i>           |                         |
|                       |                         | <i>HM13;PSIMCT-1</i>    | <i>HM13;PSIMCT-1</i>    |                         |
|                       | <i>GNAS;GNASAS</i>      | <i>GNAS;GNASAS</i>      | <i>GNAS;GNASAS</i>      |                         |
|                       | <i>GNAS</i>             | <i>GNAS</i>             | <i>GNAS</i>             |                         |
|                       | <i>GLP2R</i>            | <i>GLP2R</i>            |                         |                         |
|                       |                         | <i>GRB10</i>            |                         |                         |
|                       | <i>SVOPL</i>            |                         |                         | <i>SVOPL</i>            |
|                       | <i>PEG10;SGCE</i>       |                         |                         |                         |
|                       |                         | <i>NPAS3</i>            |                         |                         |
| <i>LOC728448</i>      | <i>LOC728448</i>        | <i>LOC728448</i>        |                         |                         |
|                       | <i>ELANE</i>            | <i>ELANE</i>            |                         |                         |
|                       | <i>DHX16</i>            | <i>DHX16</i>            |                         |                         |
|                       | <i>MAFG</i>             | <i>MAFG</i>             |                         |                         |
|                       | <i>MAP3K6</i>           | <i>MAP3K6</i>           |                         |                         |
|                       | <i>CBFA2T3</i>          | <i>CBFA2T3</i>          |                         |                         |
|                       | <i>GP9</i>              | <i>GP9</i>              |                         |                         |
|                       | <i>PRTN3</i>            | <i>PRTN3</i>            |                         |                         |
|                       | <i>BLCAP;NNAT</i>       | <i>BLCAP;NNAT</i>       |                         |                         |
|                       | <i>KCNAB3</i>           | <i>KCNAB3</i>           |                         |                         |
| <i>INPP5F</i>         |                         | <i>INPP5F</i>           |                         |                         |
|                       | <i>AZU1</i>             | <i>AZU1</i>             |                         |                         |
|                       |                         |                         | <i>MAGEL2</i>           |                         |
|                       | <i>GRB7</i>             | <i>GRB7</i>             |                         |                         |
|                       |                         |                         | <i>SNRPN;SNURF</i>      |                         |
|                       | <i>SEPT9</i>            |                         |                         |                         |
|                       | <i>PEG10</i>            |                         |                         |                         |
|                       | <i>CHD7</i>             | <i>CHD7</i>             |                         |                         |
|                       | <i>RARA</i>             | <i>RARA</i>             |                         |                         |
|                       |                         | <i>HOXB7</i>            | <i>HOXB7</i>            |                         |
|                       |                         | <i>DDR1</i>             | <i>DDR1</i>             |                         |
|                       |                         | <i>RBMXL2</i>           |                         |                         |
|                       | <i>FGR</i>              | <i>FGR</i>              |                         |                         |
|                       | <i>SLFN13</i>           | <i>SLFN13</i>           |                         |                         |
|                       | <i>PTCHD3</i>           |                         |                         |                         |
|                       | <i>CXXC5</i>            | <i>CXXC5</i>            |                         |                         |
|                       |                         |                         | <i>SLC5A1</i>           |                         |

|                |                |                     |                        |  |
|----------------|----------------|---------------------|------------------------|--|
|                | <i>P2RX1</i>   | <i>P2RX1</i>        |                        |  |
| <i>C1orf65</i> |                |                     |                        |  |
|                | <i>MAD1L1</i>  | <i>MAD1L1</i>       |                        |  |
|                | <i>FCGRT</i>   | <i>FCGRT</i>        |                        |  |
| <i>PRKCZ</i>   | <i>PRKCZ</i>   |                     |                        |  |
|                | <i>HORMAD2</i> | <i>HORMAD2</i>      |                        |  |
|                | <i>TNRC6C</i>  |                     |                        |  |
|                |                |                     | <i>MIMT1;PEG3;ZIM2</i> |  |
|                | <i>IFFO1</i>   |                     |                        |  |
|                |                | <i>HSPA7</i>        |                        |  |
|                |                | <i>MACROD1</i>      |                        |  |
|                |                | <i>COL11A2</i>      |                        |  |
|                | <i>MAN2B1</i>  |                     |                        |  |
|                |                | <i>MIR193A</i>      |                        |  |
|                |                | <i>MIR193B</i>      |                        |  |
|                | <i>PRKAG2</i>  |                     |                        |  |
|                |                | <i>BMP7</i>         |                        |  |
|                |                | <i>ADO</i>          |                        |  |
|                |                | <i>ECEL1P2</i>      |                        |  |
|                |                | <i>APLP2</i>        |                        |  |
|                |                | <i>FOXI2</i>        |                        |  |
|                | <i>MARCH8</i>  |                     |                        |  |
|                | <i>LTBR</i>    |                     |                        |  |
|                |                | <i>FAM163A</i>      |                        |  |
|                | <i>PILRA</i>   |                     |                        |  |
|                |                | <i>LHX9</i>         |                        |  |
|                |                | <i>PPT2</i>         |                        |  |
|                | <i>FXYD1</i>   |                     |                        |  |
|                |                | <i>RETN</i>         |                        |  |
|                | <i>DENND3</i>  |                     |                        |  |
|                |                | <i>INHBB</i>        |                        |  |
|                |                | <i>CSNK1E</i>       |                        |  |
|                |                | <i>ALX4</i>         |                        |  |
|                |                | <i>ZNF578</i>       |                        |  |
|                | <i>CDH5</i>    |                     |                        |  |
|                |                | <i>FBXO2;FBXO44</i> |                        |  |
|                | <i>MAEA</i>    |                     |                        |  |
|                | <i>SHC1</i>    |                     |                        |  |
|                | <i>ENTPD1</i>  |                     |                        |  |
|                |                | <i>LOC254559</i>    |                        |  |
|                |                | <i>STRA6</i>        |                        |  |
|                |                | <i>FCHO1</i>        |                        |  |
|                | <i>SYNJ2</i>   |                     |                        |  |
|                | <i>SPRED2</i>  |                     |                        |  |
|                | <i>IQCE</i>    |                     |                        |  |
|                |                | <i>UCN</i>          |                        |  |
|                | <i>BRD4</i>    |                     |                        |  |
|                |                | <i>MT1M</i>         |                        |  |
|                |                | <i>SH2B2</i>        |                        |  |
|                | <i>TMEM105</i> |                     |                        |  |

|  |                      |                     |  |
|--|----------------------|---------------------|--|
|  | <i>OSBPL5</i>        |                     |  |
|  |                      | <i>TRAPPC9</i>      |  |
|  |                      | <i>DKK4</i>         |  |
|  |                      | <i>WDR52</i>        |  |
|  |                      | <i>EGFL7</i>        |  |
|  |                      | <i>GRM2</i>         |  |
|  | <i>C11orf41</i>      |                     |  |
|  |                      | <i>ETV3L</i>        |  |
|  |                      | <i>PRDM16</i>       |  |
|  |                      | <i>ANGPT2;MCPH1</i> |  |
|  |                      | <i>MT1G;MT1H</i>    |  |
|  | <i>TRIM39</i>        |                     |  |
|  |                      | <i>AMT;NICN1</i>    |  |
|  |                      | <i>LYPD3</i>        |  |
|  |                      | <i>HLA-G</i>        |  |
|  |                      | <i>OTOP3</i>        |  |
|  |                      | <i>TMEM119</i>      |  |
|  |                      | <i>PLA2G3</i>       |  |
|  | <i>IFNGR2</i>        |                     |  |
|  |                      | <i>GABBR1</i>       |  |
|  |                      | <i>LAMB2</i>        |  |
|  | <i>SKI</i>           |                     |  |
|  | <i>ADRBK1</i>        |                     |  |
|  |                      | <i>HERC3;NAP1L5</i> |  |
|  | <i>LTBP1</i>         |                     |  |
|  |                      | <i>LPIN3</i>        |  |
|  |                      | <i>C17orf64</i>     |  |
|  | <i>MS4A3</i>         |                     |  |
|  | <i>PNPLA2</i>        |                     |  |
|  | <i>TIAM2</i>         |                     |  |
|  | <i>SNORA30;SRCAP</i> |                     |  |
|  |                      | <i>PURG;WRN</i>     |  |
|  |                      | <i>ZIC1</i>         |  |
|  |                      | <i>SNX31</i>        |  |
|  |                      | <i>FBXL18</i>       |  |
|  | <i>ZNF516</i>        |                     |  |
|  |                      | <i>EIF4E3;GPR27</i> |  |
|  | <i>TRPM2</i>         |                     |  |
|  |                      | <i>SIX2</i>         |  |
|  | <i>RNF144A</i>       |                     |  |
|  | <i>ESPNL</i>         |                     |  |
|  |                      | <i>COCH</i>         |  |
|  |                      | <i>ESPNP</i>        |  |
|  |                      | <i>MIR183;MIR96</i> |  |
|  |                      | <i>C6orf27</i>      |  |
|  | <i>C16orf68</i>      |                     |  |
|  |                      | <i>FGF2</i>         |  |
|  |                      | <i>BHMT</i>         |  |
|  |                      | <i>BCAN</i>         |  |
|  | <i>ALDH4A1</i>       |                     |  |

|  |                        |                        |  |  |
|--|------------------------|------------------------|--|--|
|  | <i>MPO</i>             |                        |  |  |
|  | <i>KRT17</i>           |                        |  |  |
|  |                        | <i>PAX6</i>            |  |  |
|  |                        | <i>ABCG4</i>           |  |  |
|  | <i>GPR97</i>           |                        |  |  |
|  |                        | <i>TRIM2</i>           |  |  |
|  | <i>ITGAE</i>           |                        |  |  |
|  |                        | <i>FGF20</i>           |  |  |
|  | <i>NADK</i>            |                        |  |  |
|  | <i>HOXB5;LOC404266</i> |                        |  |  |
|  |                        | <i>CLDN14</i>          |  |  |
|  | <i>EPHA8</i>           |                        |  |  |
|  | <i>AMPD3</i>           |                        |  |  |
|  |                        | <i>EPHA2</i>           |  |  |
|  |                        | <i>RIMS3</i>           |  |  |
|  |                        | <i>KLHDC7B</i>         |  |  |
|  |                        | <i>SHROOM1</i>         |  |  |
|  |                        | <i>SNED1</i>           |  |  |
|  | <i>MXD3</i>            |                        |  |  |
|  | <i>NCOR2</i>           |                        |  |  |
|  | <i>BTBD12</i>          |                        |  |  |
|  |                        | <i>HOXB6;LOC404266</i> |  |  |
|  |                        | <i>CCDC105</i>         |  |  |
|  | <i>FOXK1</i>           |                        |  |  |
|  |                        | <i>CHRN1</i>           |  |  |
|  |                        | <i>EPB49</i>           |  |  |
|  |                        | <i>TRADD</i>           |  |  |
|  |                        | <i>SARM1</i>           |  |  |
|  |                        | <i>KRT72</i>           |  |  |
|  |                        | <i>KRTCAP3;NRBP1</i>   |  |  |
|  |                        | <i>MGC12982</i>        |  |  |
|  |                        | <i>C17orf28</i>        |  |  |
|  | <i>S100A8</i>          |                        |  |  |
|  | <i>WDR20</i>           |                        |  |  |
|  |                        | <i>SEZ6</i>            |  |  |
|  |                        | <i>FBXO27</i>          |  |  |
|  |                        | <i>DES</i>             |  |  |
|  | <i>AGTRAP</i>          |                        |  |  |
|  |                        | <i>FGF17</i>           |  |  |
|  |                        | <i>C4orf38</i>         |  |  |
|  |                        | <i>SLC35C1</i>         |  |  |
|  |                        | <i>MARCKSL1</i>        |  |  |
|  | <i>SLC20A2</i>         |                        |  |  |
|  | <i>FBXO47</i>          |                        |  |  |
|  |                        | <i>KCNG3</i>           |  |  |
|  | <i>TSKS</i>            |                        |  |  |
|  |                        | <i>ASCL2</i>           |  |  |
|  | <i>CSTA</i>            |                        |  |  |
|  |                        | <i>FOXD2</i>           |  |  |
|  |                        | <i>DLL1</i>            |  |  |



|  |                  |                       |  |
|--|------------------|-----------------------|--|
|  | <i>FES</i>       |                       |  |
|  | <i>TRIM61</i>    |                       |  |
|  |                  | <i>KIAA2013</i>       |  |
|  | <i>C10orf95</i>  |                       |  |
|  |                  | <i>ADAM5P</i>         |  |
|  | <i>RAB11FIP3</i> |                       |  |
|  |                  | <i>LRP1</i>           |  |
|  |                  | <i>RG512</i>          |  |
|  |                  | <i>C13orf26</i>       |  |
|  |                  | <i>LRP5</i>           |  |
|  |                  | <i>WWTR1</i>          |  |
|  |                  | <i>DLEU7</i>          |  |
|  |                  | <i>LRRC32</i>         |  |
|  | <i>TBCD</i>      |                       |  |
|  |                  | <i>WNT6</i>           |  |
|  |                  | <i>TP73</i>           |  |
|  | <i>RIN2</i>      |                       |  |
|  |                  | <i>KRTCAP3</i>        |  |
|  |                  | <i>CHRD</i>           |  |
|  | <i>C18orf1</i>   |                       |  |
|  |                  | <i>LSP1</i>           |  |
|  | <i>AATK</i>      |                       |  |
|  | <i>MGRN1</i>     |                       |  |
|  | <i>LOC404266</i> |                       |  |
|  |                  | <i>LPAR5</i>          |  |
|  | <i>DTX1</i>      |                       |  |
|  |                  | <i>TRIL</i>           |  |
|  |                  | <i>CMYA5</i>          |  |
|  |                  | <i>RNF39</i>          |  |
|  | <i>SLFN12L</i>   |                       |  |
|  |                  | <i>ABAT</i>           |  |
|  |                  | <i>LOC100129637</i>   |  |
|  |                  | <i>KCNA3</i>          |  |
|  | <i>SEMA6B</i>    |                       |  |
|  |                  | <i>SEC31B</i>         |  |
|  |                  | <i>C14orf48</i>       |  |
|  |                  | <i>CCDC42B</i>        |  |
|  |                  | <i>PLBD1</i>          |  |
|  | <i>CEBPE</i>     |                       |  |
|  |                  | <i>LPIN1</i>          |  |
|  |                  | <i>SPI1</i>           |  |
|  |                  | <i>PNMAL2</i>         |  |
|  |                  | <i>FOXD2;MGC12982</i> |  |
|  | <i>CPNE6</i>     |                       |  |
|  |                  | <i>LOC146880</i>      |  |
|  | <i>IL1R2</i>     |                       |  |
|  | <i>LPCAT1</i>    |                       |  |
|  |                  | <i>ECEL1</i>          |  |
|  |                  | <i>PDXDC1</i>         |  |
|  |                  | <i>GDNF</i>           |  |

|  |                |                                      |  |  |
|--|----------------|--------------------------------------|--|--|
|  |                | <i>PLEC1</i>                         |  |  |
|  | <i>ALDH3B1</i> |                                      |  |  |
|  | <i>TRIM27</i>  |                                      |  |  |
|  |                | <i>SLC24A4</i>                       |  |  |
|  | <i>MEST</i>    |                                      |  |  |
|  |                | <i>SYNGAP1</i>                       |  |  |
|  |                | <i>HRASLS5</i>                       |  |  |
|  |                | <i>DMKN</i>                          |  |  |
|  |                | <i>LOC100130872-<br/>SPON2;SPON2</i> |  |  |
|  |                | <i>SNRPF</i>                         |  |  |
|  | <i>RASA3</i>   |                                      |  |  |
|  | <i>SBNO2</i>   |                                      |  |  |
|  | <i>GFI1</i>    |                                      |  |  |
|  | <i>NOTCH4</i>  |                                      |  |  |
|  | <i>CALR</i>    |                                      |  |  |
|  |                | <i>PPT2;PRRT1</i>                    |  |  |
|  |                | <i>PURA</i>                          |  |  |
|  | <i>FUT4</i>    |                                      |  |  |
|  |                | <i>SIGLEC9</i>                       |  |  |
|  | <i>ZBTB47</i>  |                                      |  |  |
|  |                | <i>DIO3;MIR1247</i>                  |  |  |
|  | <i>HLA-DMB</i> |                                      |  |  |
|  |                | <i>CCDC19</i>                        |  |  |
|  |                | <i>PRRT1</i>                         |  |  |

**Supplementary Table 2. Genomic regions in four TND-SIMPLE cases, as identified by the single sample analysis pipeline.** Probes with M-values between -1 and +1 in controls and relative hypomethylation in patients with a p-values of <0.05 were identified. This subset was further filtered by minimal criteria for a hypomethylated locus, that is, a minimum 3 consecutive hypomethylated probes spaced by <2000 nucleotides. Candidate regions that meet these criteria in TND-SIMPLE cases are listed in the tables.

| TND-SIMPLE1          | TND-SIMPLE2          | TND-SIMPLE3          | TND-SIMPLE4          |
|----------------------|----------------------|----------------------|----------------------|
| <i>HYMAI; PLAGL1</i> | <i>HYMAI; PLAGL1</i> | <i>HYMAI; PLAGL1</i> | <i>HYMAI; PLAGL1</i> |
|                      | <i>GLP2R</i>         | <i>GLP2R</i>         |                      |
|                      |                      | <i>GNAS</i>          |                      |
|                      | <i>TRIM15</i>        |                      |                      |
|                      | <i>GATS; PVRIG</i>   |                      |                      |
|                      | <i>RASSF5</i>        |                      |                      |
|                      | <i>CD247</i>         |                      |                      |
|                      | <i>SEPT9</i>         |                      |                      |
|                      | <i>DIABLO</i>        |                      |                      |
|                      | <i>TSHR</i>          |                      |                      |
|                      | <i>BCL9L</i>         |                      |                      |
|                      | <i>KIAA1949</i>      |                      |                      |
|                      | <i>CLSTN1</i>        |                      |                      |
|                      | <i>TNFRSF18</i>      |                      |                      |
|                      | <i>ANKRD11</i>       |                      |                      |
|                      | <i>PTPRCAP</i>       |                      |                      |

|  |                        |  |  |
|--|------------------------|--|--|
|  | <i>CYGB</i>            |  |  |
|  | <i>STAT3</i>           |  |  |
|  | <i>DENND2D</i>         |  |  |
|  | <i>WIBG</i>            |  |  |
|  | <i>MAD1L1</i>          |  |  |
|  | <i>NA</i>              |  |  |
|  | <i>PIK3CD</i>          |  |  |
|  | <i>RUNX3</i>           |  |  |
|  | <i>RPS6KB2</i>         |  |  |
|  | <i>HFM1</i>            |  |  |
|  | <i>SLCO5A1</i>         |  |  |
|  | <i>MEST; MESTIT1</i>   |  |  |
|  | <i>ZAP70</i>           |  |  |
|  | <i>DGKA</i>            |  |  |
|  | <i>PDCD1</i>           |  |  |
|  | <i>H19</i>             |  |  |
|  | <i>IFITM1</i>          |  |  |
|  | <i>DDIT4</i>           |  |  |
|  | <i>PEG10; SGCE</i>     |  |  |
|  | <i>CCDC57</i>          |  |  |
|  | <i>KLF2</i>            |  |  |
|  | <i>PSMB8</i>           |  |  |
|  | <i>ZFP36L1</i>         |  |  |
|  | <i>ABI3; GNGT2</i>     |  |  |
|  | <i>CHRNA4</i>          |  |  |
|  | <i>LTA</i>             |  |  |
|  | <i>MEG3</i>            |  |  |
|  | <i>PRF1</i>            |  |  |
|  | <i>KCNQ1; KCNQ1OT1</i> |  |  |
|  | <i>ACOT7</i>           |  |  |
|  | <i>PBX2</i>            |  |  |
|  | <i>CORO1B; PTPRCAP</i> |  |  |
|  | <i>FSD1</i>            |  |  |
|  | <i>LGALS3BP</i>        |  |  |
|  | <i>LIME1</i>           |  |  |
|  | <i>POU2AF1</i>         |  |  |
|  | <i>CD3D; CD3G</i>      |  |  |
|  | <i>TC2N</i>            |  |  |
|  | <i>LCK</i>             |  |  |
|  | <i>GNG7</i>            |  |  |
|  | <i>FLOT1</i>           |  |  |
|  | <i>GPR133</i>          |  |  |
|  | <i>TMIGD2</i>          |  |  |
|  | <i>CD3D</i>            |  |  |
|  | <i>SH3TC1</i>          |  |  |

**Supplementary Table 3. Genomic regions in three BWS-SIMPLE cases, as identified by the single sample analysis pipeline.** Probes with M-values between -1 and +1 in controls and relative hypomethylation in patients with a p-values of <0.05 were identified. This subset was further filtered by minimal criteria for a hypomethylated locus, that is, a minimum 3 consecutive hypomethylated probes spaced by <2000 nucleotides. Candidate regions that meet these criteria in BWS-SIMPLE cases are listed in the tables.

| BWS-SIMPLE 1           | BWS-SIMPLE2            | BWS-SIMPLE3              |
|------------------------|------------------------|--------------------------|
| <i>KCNQ1; KCNQ1OT1</i> | <i>KCNQ1; KCNQ1OT1</i> | <i>KCNQ1; KCNQ1OT1</i>   |
|                        |                        | <i>GNAS</i>              |
|                        |                        | <i>MEG3</i>              |
|                        |                        | <i>ERLIN2; LOC728024</i> |
|                        | <i>GJD3</i>            |                          |

**Supplementary Table 4. Shared sites detected by the single sample analysis pipeline in biological replicates.** DNA from TND-MLMD1 was independently processed in two different batches. Probes with M-values between -1 and +1 in controls and relative hypomethylation in patients with a p-values of <0.05 were identified. This subset was further filtered by minimal criteria for a hypomethylated locus, that is, a minimum 3 consecutive hypomethylated probes spaced by <2000 nucleotides. The p-values were determined by Fisher's combined p-value method for independent tests. Here, ID = Imprinting Disorder; DMR = Differentially Methylated Region.

|                                  | Chr | TND-MLMD1 batch1        |                     |               |           | TND-MLMD1 batch2    |               |           |
|----------------------------------|-----|-------------------------|---------------------|---------------|-----------|---------------------|---------------|-----------|
|                                  |     | Gene name               | Probe region        | No. of probes | P-value   | Probe region        | No. of probes | P-value   |
| Imprinted-associated with ID     | 6   | <i>HYMAI;PLAGL1</i>     | 144328482-144329922 | 16            | 1.07E-102 | 144328482-144329909 | 15            | 7.49E-16  |
|                                  | 7   | <i>MEST;MESTIT1</i>     | 130130122-130131931 | 43            | 7.48E-276 | 130130288-130132161 | 41            | 6.56E-273 |
|                                  | 11  | <i>KCNQ1;KCNQ1OT1</i>   | 2720229-2722195     | 31            | 0         | 2720229-2722195     | 31            | 3.84E-315 |
| Imprinted-not associated with ID | 1   | <i>DIRAS3</i>           | 68515788-68517273   | 20            | 2.95E-171 | 68515788-68517273   | 20            | 1.52E-146 |
|                                  | 6   | <i>FAM50B</i>           | 3849235-3849702     | 18            | 7.81E-84  | 3849331-3849702     | 15            | 2.83E-33  |
|                                  | 10  | <i>INPP5F</i>           | 121578384-121578639 | 3             | 1.54E-05  |                     |               |           |
|                                  | 15  | <i>IGF1R</i>            | 99408636-99409506   | 6             | 7.29E-14  | 99408804-99409506   | 5             | 1.62E-09  |
|                                  | 19  | <i>ZNF331</i>           | 54040774-54041999   | 9             | 1.84E-40  | 54040813-54041856   | 7             | 5.71E-51  |
|                                  | 20  | <i>L3MBTL</i>           | 42142417-42143502   | 22            | 2.50E-201 | 42142417-42143502   | 25            | 4.99E-198 |
| Novel candidate DMRs             | 4   | <i>JAKMIP1</i>          | 6107131-6107339     | 4             | 1.25E-06  | 6107021-6107339     | 5             | 4.53E-15  |
|                                  | 5   | <i>TMEM232</i>          | 110062343-110062473 | 5             | 1.16E-06  |                     |               |           |
|                                  | 8   | <i>LOC728024;ERLIN2</i> | 37605359-37605978   | 7             | 4.86E-42  | 37605552-37605978   | 4             | 2.33E-21  |
|                                  | 17  | <i>GLP2R</i>            | 9729250-9729424     | 6             | 1.44E-10  |                     |               |           |
|                                  | 17  | <i>TNRC6C</i>           | 76036514-76037562   | 7             | 1.88E-16  | 76036514-76037562   | 7             | 6.13E-13  |
|                                  | 18  | <i>LOC100130522</i>     | 77905298-77905947   | 8             | 1.44E-45  | 77905298-77905947   | 9             | 3.35E-38  |









**Supplementary Table 6. Effect size calculation for Crawford-Howell t-test in imprinting disorders.** Here, the effect sizes are presented over *PLAGL1* imprinting control region with 95% confidence interval for TND-MLMD3.

| Genomic Location chr6 (hg19) | Control size = 05           | Control size = 10            | Control size = 20            | Control size = 30            | Control size = 40            | Control size = 50            |
|------------------------------|-----------------------------|------------------------------|------------------------------|------------------------------|------------------------------|------------------------------|
| 144329473                    | -13.319 (-22.268 to -4.581) | -13.345 (-19.430 to -7.274)  | -14.089 (-18.546 to -9.623)  | -14.213 (-17.863 to -10.554) | -15.179 (-18.543 to -11.806) | -15.463 (-18.523 to -12.395) |
| 144386416                    | -0.190 (-1.065 to 0.706)    | -0.283 (-0.909 to 0.357)     | -0.089 (-0.527 to 0.351)     | -0.515 (-0.892 to -0.130)    | -0.245 (-0.558 to 0.071)     | -0.068 (-0.345 to 0.210)     |
| 144329766                    | -9.046 (-15.153 to -3.069)  | -11.585 (-16.875 to -6.304)  | -11.815 (-15.560 to -8.061)  | -12.632 (-15.880 to -9.376)  | -11.893 (-14.536 to -9.243)  | -13.713 (-16.429 to -10.989) |
| 144329052                    | -13.466 (-22.513 to -4.633) | -15.384 (-22.391 to -8.396)  | -16.475 (-21.681 to -11.260) | -16.331 (-20.520 to -12.132) | -15.625 (-19.088 to -12.154) | -19.242 (-23.045 to -15.431) |
| 144329780                    | -15.396 (-25.730 to -5.311) | -13.945 (-20.300 to -7.604)  | -16.704 (-21.981 to -11.417) | -14.601 (-18.350 to -10.843) | -14.384 (-17.574 to -11.187) | -15.239 (-18.255 to -12.216) |
| 144329331                    | -8.218 (-13.775 to -2.772)  | -7.424 (-10.844 to -4.002)   | -7.914 (-10.442 to -5.377)   | -7.578 (-9.546 to -5.602)    | -8.895 (-10.881 to -6.901)   | -9.368 (-11.234 to -7.496)   |
| 144329789                    | -8.406 (-14.089 to -2.840)  | -9.858 (-14.371 to -5.351)   | -10.843 (-14.284 to -7.394)  | -10.590 (-13.320 to -7.853)  | -12.963 (-15.840 to -10.078) | -12.339 (-14.787 to -9.886)  |
| 144329485                    | -10.626 (-17.782 to -3.630) | -10.663 (-15.538 to -5.796)  | -12.486 (-16.441 to -8.522)  | -13.044 (-16.396 to -9.682)  | -13.743 (-16.792 to -10.686) | -14.270 (-17.095 to -11.437) |
| 144329909                    | -19.247 (-32.150 to -6.660) | -13.840 (-20.149 to -7.546)  | -9.724 (-12.816 to -6.624)   | -12.783 (-16.069 to -9.488)  | -7.076 (-8.667 to -5.478)    | -9.360 (-11.224 to -7.489)   |
| 144328482                    | -21.470 (-35.857 to -7.438) | -22.586 (-32.853 to -12.350) | -25.334 (-33.323 to -17.332) | -22.650 (-28.451 to -16.837) | -20.523 (-25.064 to -15.972) | -23.970 (-28.703 to -19.227) |
| 144329829                    | -17.447 (-29.148 to -6.030) | -19.751 (-28.734 to -10.795) | -24.289 (-31.950 to -16.616) | -20.136 (-25.295 to -14.965) | -17.954 (-21.929 to -13.970) | -23.917 (-28.640 to -19.185) |
| 144329732                    | -2.725 (-4.721 to -0.702)   | -2.854 (-4.277 to -1.406)    | -3.314 (-4.440 to -2.174)    | -3.202 (-4.091 to -2.303)    | -3.779 (-4.667 to -2.885)    | -3.693 (-4.469 to -2.910)    |
| 144329172                    | -13.161 (-22.004 to -4.525) | -15.275 (-22.232 to -8.335)  | -13.214 (-17.397 to -9.022)  | -15.080 (-18.950 to -11.200) | -14.087 (-17.211 to -10.955) | -16.859 (-20.194 to -13.517) |
| 144329887                    | -22.207 (-37.088 to -7.696) | -17.809 (-25.913 to -9.728)  | -10.413 (-13.719 to -7.097)  | -10.250 (-12.893 to -7.599)  | -11.259 (-13.763 to -8.748)  | -9.929 (-11.905 to -7.947)   |
| 144328917                    | -24.650 (-41.162 to -8.549) | -21.641 (-31.480 to -11.832) | -21.309 (-28.033 to -14.574) | -20.179 (-25.350 to -14.998) | -13.875 (-16.953 to -10.789) | -23.252 (-27.844 to -18.651) |
| 144329802                    | -6.429 (-10.807 to -2.126)  | -8.371 (-12.215 to -4.528)   | -9.267 (-12.216 to -6.309)   | -9.244 (-11.633 to -6.848)   | -1.394 (-1.826 to -0.952)    | -10.330 (-12.385 to -8.270)  |

**Supplementary Table 7. The performance of three t-tests (one-sample, Weisberg, Crawford-Howell t-tests) around the *PLAGL1* region in TND-MLMD1.** The point estimate represents the estimated percentage of the control population that would be expected to obtain lower score than the case and 95% confidence interval of point estimates were calculated from the noncentrality parameter from a noncentral t-distribution. Here, CH = Crawford-Howell t-test, WB = Weisberg t-test, and OS = One-sample t-test. Additionally, Chr = chromosome, Map information = genomic location (hg19), ILMNID = Illumina Infinium HumanMethylation450 array probe ID, Mean = Control mean, and SD = control standard deviation.

| ILMNID     | Chr | Map Information | Control group |       | Case score | T-value |         |         | P-value  |          |          | CH.Point | WB.Point | OS.Point | Estimated percentage of the control population obtaining a lower score than the case |
|------------|-----|-----------------|---------------|-------|------------|---------|---------|---------|----------|----------|----------|----------|----------|----------|--------------------------------------------------------------------------------------|
|            |     |                 | Mean          | SD    |            | CH.t    | WB.t    | OS.t    | CH.p     | WB.p     | OS.p     |          |          |          | (95%CI)                                                                              |
| cg13607311 | 6   | 144262258       | 2.832         | 0.225 | 3.017      | 0.813   | 0.812   | -5.803  | 0.21     | 0.421    | 4.70E-07 | 21       | 42.1     | 4.70E-05 | (12.744 to 30.980)                                                                   |
| cg01659632 | 6   | 144262297       | 3.131         | 0.294 | 3.063      | -0.231  | -0.231  | 1.651   | 0.409    | 0.818    | 0.105    | 40.9     | 81.8     | 10.5     | (30.385 to 51.939)                                                                   |
| cg06271237 | 6   | 144263369       | 0.164         | 0.394 | 0.603      | 1.102   | 1.102   | -7.869  | 0.138    | 0.276    | 3.03E-10 | 13.8     | 27.6     | 3.03E-08 | (7.173 to 22.495)                                                                    |
| cg26261298 | 6   | 144263435       | -2.113        | 0.549 | -1.275     | 1.511   | 1.51    | -10.787 | 0.069    | 0.138    | 1.53E-14 | 6.9      | 13.8     | 1.53E-12 | (2.673 to 13.296)                                                                    |
| cg12419863 | 6   | 144263450       | -0.481        | 0.502 | 0.162      | 1.269   | 1.269   | -9.066  | 0.105    | 0.21     | 4.70E-12 | 10.5     | 21       | 4.70E-10 | (4.908 to 18.325)                                                                    |
| cg21776667 | 6   | 144281452       | 2.46          | 0.203 | 2.62       | 0.779   | 0.779   | -5.562  | 0.22     | 0.44     | 1.10E-06 | 22       | 44       | 0.00011  | (13.539 to 32.068)                                                                   |
| cg18316621 | 6   | 144283348       | 2.917         | 0.233 | 2.797      | -0.511  | -0.51   | 3.646   | 0.306    | 0.612    | 0.001    | 30.6     | 61.2     | 0.1      | (20.937 to 41.371)                                                                   |
| cg01445838 | 6   | 144286805       | 1.173         | 0.545 | 1.881      | 1.287   | 1.287   | -9.194  | 0.102    | 0.204    | 3.04E-12 | 10.2     | 20.4     | 3.04E-10 | (4.704 to 17.913)                                                                    |
| cg17870553 | 6   | 144292355       | 2.507         | 0.201 | 2.632      | 0.617   | 0.617   | -4.409  | 0.27     | 0.54     | 5.67E-05 | 27       | 54       | 0.00567  | (17.772 to 37.543)                                                                   |
| cg27577583 | 6   | 144294847       | 2.96          | 0.197 | 3.046      | 0.433   | 0.433   | -3.093  | 0.333    | 0.667    | 0.003    | 33.3     | 66.7     | 0.3      | (23.400 to 44.233)                                                                   |
| cg09730369 | 6   | 144328421       | 1.203         | 0.156 | -0.615     | -11.574 | -11.572 | 82.655  | 6.66E-16 | 1.78E-15 | 0        | 6.66E-14 | 1.78E-13 | 0        | (1.36E-42 to 7.11E-19)                                                               |
| cg17865602 | 6   | 144328482       | 0.723         | 0.122 | -2.192     | -23.736 | -23.731 | 169.506 | 0        | 0        | 0        | 0        | 0        | 0        | (3.03E-178 to 1.38E-79)                                                              |
| cg25350411 | 6   | 144328917       | 0.125         | 0.129 | -2.876     | -23.023 | -23.018 | 164.415 | 0        | 0        | 0        | 0        | 0        | 0        | (1.00E-167 to 6.95E-75)                                                              |
| cg07077459 | 6   | 144329052       | 0.346         | 0.132 | -2.191     | -19.051 | -19.047 | 136.051 | 0        | 0        | 0        | 0        | 0        | 0        | (5.61E-115 to 2.69E-51)                                                              |
| cg22378065 | 6   | 144329172       | 0.351         | 0.14  | -2.005     | -16.692 | -16.689 | 119.205 | 0        | 0        | 0        | 0        | 0        | 0        | (2.40E-88 to 2.22E-39)                                                               |
| cg10007452 | 6   | 144329331       | 0.062         | 0.132 | -1.173     | -9.275  | -9.273  | 66.237  | 1.15E-12 | 2.82E-12 | 0        | 1.15E-10 | 2.82E-10 | 0        | (2.16E-27 to 4.87E-12)                                                               |
| cg00702231 | 6   | 144329473       | 0.565         | 0.169 | -2.052     | -15.31  | -15.307 | 109.339 | 0        | 0        | 0        | 0        | 0        | 0        | (2.25E-74 to 4.00E-33)                                                               |
| cg12757684 | 6   | 144329485       | 0.023         | 0.144 | -2.026     | -14.127 | -14.124 | 100.889 | 0        | 0        | 0        | 0        | 0        | 0        | (2.32E-63 to 3.44E-28)                                                               |
| cg21952820 | 6   | 144329732       | 0.249         | 0.358 | -1.075     | -3.655  | -3.654  | 26.103  | 0        | 0.001    | 0        | 0        | 0.1      | 0        | (0.000 to 0.181)                                                                     |
| cg05326984 | 6   | 144329766       | 0.096         | 0.164 | -2.154     | -13.575 | -13.572 | 96.945  | 0        | 0        | 0        | 0        | 0        | 0        | (1.60E-58 to 5.07E-26)                                                               |

|            |   |           |        |       |        |         |         |         |          |          |          |          |          |          |                         |
|------------|---|-----------|--------|-------|--------|---------|---------|---------|----------|----------|----------|----------|----------|----------|-------------------------|
| cg08263357 | 6 | 144329780 | 0.668  | 0.193 | -2.278 | -15.091 | -15.088 | 107.769 | 0        | 0        | 0        | 0        | 0        | 0        | (2.91E-72 to 3.53E-32)  |
| cg11532302 | 6 | 144329789 | 0.148  | 0.168 | -1.927 | -12.219 | -12.217 | 87.264  | 1.11E-16 | 2.22E-16 | 0        | 1.11E-14 | 2.22E-14 | 0        | (1.86E-47 to 4.66E-21)  |
| cg27216384 | 6 | 144329802 | -0.09  | 0.149 | -1.629 | -10.228 | -10.226 | 73.043  | 4.73E-14 | 1.21E-13 | 0        | 4.73E-12 | 1.21E-11 | 0        | (2.72E-33 to 1.08E-14)  |
| cg17895149 | 6 | 144329829 | 0.405  | 0.116 | -2.365 | -23.679 | -23.675 | 169.104 | 0        | 0        | 0        | 0        | 0        | 0        | (2.10E-177 to 3.29E-79) |
| cg23460430 | 6 | 144329887 | 0.789  | 0.184 | -1.041 | -9.832  | -9.83   | 70.214  | 1.76E-13 | 4.43E-13 | 0        | 1.76E-11 | 4.43E-11 | 0        | (9.04E-31 to 1.47E-13)  |
| cg14161241 | 6 | 144329909 | 0.378  | 0.148 | -1.009 | -9.269  | -9.267  | 66.194  | 1.18E-12 | 2.88E-12 | 0        | 1.18E-10 | 2.88E-10 | 0        | (2.35E-27 to 5.05E-12)  |
| cg03562868 | 6 | 144329922 | 1.14   | 0.209 | 0.334  | -3.813  | -3.813  | 27.233  | 0        | 0        | 0        | 0        | 0        | 0        | (0.000 to 0.119)        |
| cg20443501 | 6 | 144329962 | 1.207  | 0.137 | 0.727  | -3.458  | -3.458  | 24.697  | 0.001    | 0.001    | 0        | 0.1      | 0.1      | 0        | (0.001 to 0.301)        |
| cg04840930 | 6 | 144329997 | 2.184  | 0.12  | 1.644  | -4.458  | -4.457  | 31.838  | 2.41E-05 | 4.97E-05 | 0        | 0.00241  | 0.00497  | 0        | (3.10E-06 to 0.018)     |
| cg18593039 | 6 | 144330162 | 1.746  | 0.194 | 1.795  | 0.253   | 0.252   | -1.803  | 0.401    | 0.802    | 0.077    | 40.1     | 80.2     | 7.7      | (29.615 to 51.114)      |
| cg23840797 | 6 | 144330233 | 2.624  | 0.152 | 2.381  | -1.583  | -1.583  | 11.308  | 0.06     | 0.12     | 2.89E-15 | 6        | 12       | 2.89E-13 | (2.192 to 11.992)       |
| cg00981250 | 6 | 144330345 | 3.108  | 0.143 | 3.064  | -0.305  | -0.305  | 2.178   | 0.381    | 0.762    | 0.034    | 38.1     | 76.2     | 3.4      | (27.749 to 49.092)      |
| cg02697107 | 6 | 144333219 | 1.763  | 0.202 | 1.852  | 0.435   | 0.435   | -3.107  | 0.333    | 0.666    | 0.003    | 33.3     | 66.6     | 0.3      | (23.338 to 44.162)      |
| cg08256027 | 6 | 144334733 | -2.165 | 0.313 | -2.37  | -0.649  | -0.649  | 4.638   | 0.26     | 0.519    | 2.64E-05 | 26       | 51.9     | 0.00264  | (16.874 to 36.421)      |
| cg07018708 | 6 | 144334983 | 2.465  | 0.176 | 2.219  | -1.384  | -1.384  | 9.887   | 0.086    | 0.173    | 2.93E-13 | 8.6      | 17.3     | 2.93E-11 | (3.707 to 15.785)       |
| cg27016993 | 6 | 144382594 | 2.257  | 0.129 | 2.147  | -0.84   | -0.84   | 6.002   | 0.202    | 0.405    | 2.32E-07 | 20.2     | 40.5     | 2.32E-05 | (12.110 to 30.095)      |
| cg02566775 | 6 | 144382964 | -0.058 | 0.318 | 0.722  | 2.43    | 2.43    | -17.355 | 0.009    | 0.019    | 0        | 0.9      | 1.9      | 0        | (0.131 to 2.920)        |
| cg04232541 | 6 | 144384895 | -3.576 | 0.163 | -3.541 | 0.215   | 0.215   | -1.535  | 0.415    | 0.831    | 0.131    | 41.5     | 83.1     | 13.1     | (30.976 to 52.568)      |
| cg07750706 | 6 | 144385261 | -3.568 | 0.198 | -3.652 | -0.421  | -0.421  | 3.007   | 0.338    | 0.676    | 0.004    | 33.8     | 67.6     | 0.4      | (23.797 to 44.686)      |
| cg04319464 | 6 | 144385609 | -2.09  | 0.24  | -1.904 | 0.767   | 0.767   | -5.476  | 0.223    | 0.447    | 1.49E-06 | 22.3     | 44.7     | 0.000149 | (13.832 to 32.464)      |
| cg18144296 | 6 | 144385771 | -2.85  | 0.174 | -2.555 | 1.68    | 1.679   | -11.995 | 0.05     | 0.1      | 4.44E-16 | 5        | 10       | 4.44E-14 | (1.670 to 10.422)       |
| cg15144236 | 6 | 144385792 | -3.497 | 0.196 | -3.304 | 0.971   | 0.971   | -6.937  | 0.168    | 0.336    | 8.31E-09 | 16.8     | 33.6     | 8.31E-07 | (9.412 to 26.126)       |
| cg07507918 | 6 | 144385806 | -2.839 | 0.144 | -2.71  | 0.883   | 0.883   | -6.304  | 0.191    | 0.382    | 7.95E-08 | 19.1     | 38.2     | 7.95E-06 | (11.188 to 28.779)      |
| cg21242697 | 6 | 144385893 | -2.865 | 0.134 | -2.905 | -0.294  | -0.294  | 2.102   | 0.385    | 0.77     | 0.041    | 38.5     | 77       | 4.1      | (28.127 to 49.504)      |
| cg23521444 | 6 | 144385917 | -3.028 | 0.181 | -2.986 | 0.234   | 0.234   | -1.669  | 0.408    | 0.816    | 0.101    | 40.8     | 81.6     | 10.1     | (30.294 to 51.842)      |
| cg02926622 | 6 | 144386041 | -3.074 | 0.196 | -2.927 | 0.74    | 0.74    | -5.285  | 0.231    | 0.463    | 2.89E-06 | 23.1     | 46.3     | 0.000289 | (14.492 to 33.345)      |
| cg09307468 | 6 | 144386093 | -2.764 | 0.286 | -2.281 | 1.673   | 1.673   | -11.947 | 0.05     | 0.101    | 4.44E-16 | 5        | 10.1     | 4.44E-14 | (1.702 to 10.526)       |
| cg06493166 | 6 | 144386146 | -2.053 | 0.381 | -1.47  | 1.514   | 1.514   | -10.812 | 0.068    | 0.137    | 1.42E-14 | 6.8      | 13.7     | 1.42E-12 | (2.648 to 13.231)       |
| cg00814597 | 6 | 144386148 | -1.942 | 0.23  | -1.539 | 1.738   | 1.738   | -12.414 | 0.044    | 0.089    | 0        | 4.4      | 8.9      | 0        | (1.406 to 9.541)        |
| cg16334244 | 6 | 144386231 | -1.287 | 0.242 | -1.153 | 0.55    | 0.55    | -3.927  | 0.292    | 0.585    | 0        | 29.2     | 58.5     | 0        | (19.738 to 39.943)      |
| cg12444861 | 6 | 144386275 | 0.286  | 0.135 | 0.361  | 0.553   | 0.552   | -3.946  | 0.292    | 0.583    | 0        | 29.2     | 58.3     | 0        | (19.658 to 39.846)      |

|            |   |           |       |       |       |        |        |        |       |       |          |      |      |          |                    |
|------------|---|-----------|-------|-------|-------|--------|--------|--------|-------|-------|----------|------|------|----------|--------------------|
| cg02849309 | 6 | 144386280 | 0.922 | 0.168 | 1.145 | 1.316  | 1.316  | -9.4   | 0.097 | 0.194 | 1.51E-12 | 9.7  | 19.4 | 1.51E-10 | (4.388 to 17.261)  |
| cg01595870 | 6 | 144386416 | 0.844 | 0.162 | 0.833 | -0.067 | -0.067 | 0.481  | 0.473 | 0.947 | 0.633    | 47.3 | 94.7 | 63.3     | (36.499 to 58.311) |
| cg09293391 | 6 | 144386418 | 0.619 | 0.161 | 0.737 | 0.725  | 0.725  | -5.176 | 0.236 | 0.472 | 4.22E-06 | 23.6 | 47.2 | 0.000422 | (14.880 to 33.856) |
| cg25291978 | 6 | 144386422 | 2.198 | 0.295 | 2.365 | 0.561  | 0.561  | -4.004 | 0.289 | 0.578 | 0        | 28.9 | 57.8 | 0        | (19.416 to 39.555) |
| cg04895233 | 6 | 144386457 | 1.678 | 0.209 | 1.564 | -0.541 | -0.541 | 3.865  | 0.295 | 0.591 | 0        | 29.5 | 59.1 | 0        | (20.001 to 40.258) |
| cg25535418 | 6 | 144386474 | 2.423 | 0.3   | 2.395 | -0.093 | -0.093 | 0.663  | 0.463 | 0.926 | 0.511    | 46.3 | 92.6 | 51.1     | (35.531 to 57.322) |
| cg10254692 | 6 | 144386515 | 0.586 | 0.235 | 0.756 | 0.714  | 0.714  | -5.098 | 0.239 | 0.479 | 5.53E-06 | 23.9 | 47.9 | 0.000553 | (15.159 to 34.222) |
| cg20931541 | 6 | 144386528 | 2.111 | 0.306 | 2.015 | -0.31  | -0.31  | 2.216  | 0.379 | 0.758 | 0.031    | 37.9 | 75.8 | 3.1      | (27.564 to 48.890) |
| cg21113768 | 6 | 144386848 | 2.548 | 0.231 | 2.79  | 1.034  | 1.034  | -7.386 | 0.153 | 0.306 | 1.68E-09 | 15.3 | 30.6 | 1.68E-07 | (8.278 to 24.335)  |
| cg24750627 | 6 | 144387124 | 1.516 | 0.155 | 1.405 | -0.71  | -0.71  | 5.074  | 0.24  | 0.481 | 6.01E-06 | 24   | 48.1 | 0.000601 | (15.247 to 34.337) |
| cg14143954 | 6 | 144388928 | 2.251 | 0.171 | 2.401 | 0.869  | 0.868  | -6.203 | 0.195 | 0.389 | 1.14E-07 | 19.5 | 38.9 | 1.14E-05 | (11.491 to 29.215) |

**Supplementary Table 8. The performance of three t-tests (one-sample, Weisberg, Crawford-Howell t-tests) around the *KCNQ1OT1* region in BWS-MLMD1.**

The point estimate represents the estimated percentage of the control population that would be expected to obtain lower score than the case and 95% confidence interval of point estimates were calculated from the noncentrality parameter from a noncentral t-distribution. Here, CH = Crawford-Howell t-test, WB = Weisberg t-test, and OS = One-sample t-test. Additionally, Chr = chromosome, Map information = genomic location (hg19), ILMNID = Illumina Infinium HumanMethylation450 array probe ID, Mean = Control mean, and SD = control standard deviation.

| ILMNID     | Chr | Map Information | Control group |       | Case score | T-value |        |         | P-value |        |          | Estimated percentage of the control population obtaining a lower score than the case |          |          |                    |
|------------|-----|-----------------|---------------|-------|------------|---------|--------|---------|---------|--------|----------|--------------------------------------------------------------------------------------|----------|----------|--------------------|
|            |     |                 | Mean          | SD    |            | CH.t    | WB.t   | OS.t    | CH.p    | WB.p   | OS.p     | CH.Point                                                                             | WB.Point | OS.Point | (95% CI)           |
| cg21190593 | 11  | 2451058         | 1.109         | 0.268 | 0.864      | -0.906  | -0.905 | 6.467   | 0.185   | 0.185  | 4.44E-08 | 18.5                                                                                 | 18.5     | 4.44E-06 | (10.710 to 28.081) |
| cg19936757 | 11  | 2452218         | 1.295         | 0.146 | 1.543      | 1.684   | 1.684  | -12.029 | 0.049   | 0.0495 | 4.44E-16 | 4.9                                                                                  | 4.95     | 4.44E-14 | (1.647 to 10.348)  |
| cg14408823 | 11  | 2458481         | 1.831         | 0.157 | 1.625      | -1.296  | -1.296 | 9.257   | 0.1005  | 0.1005 | 2.45E-12 | 10.05                                                                                | 10.05    | 2.45E-10 | (4.605 to 17.711)  |
| cg10425885 | 11  | 2458734         | 2.354         | 0.142 | 2.497      | 0.998   | 0.998  | -7.128  | 0.1615  | 0.1615 | 4.20E-09 | 16.15                                                                                | 16.15    | 4.20E-07 | (8.917 to 25.355)  |
| cg04055211 | 11  | 2459151         | 2.359         | 0.22  | 2.448      | 0.401   | 0.4    | -2.861  | 0.345   | 0.3455 | 0.006    | 34.5                                                                                 | 34.55    | 0.6      | (24.475 to 45.455) |
| cg20429584 | 11  | 2461432         | 2.683         | 0.207 | 2.484      | -0.954  | -0.954 | 6.811   | 0.1725  | 0.1725 | 1.30E-08 | 17.25                                                                                | 17.25    | 1.30E-06 | (9.748 to 26.641)  |
| cg15033776 | 11  | 2463739         | 2.998         | 0.31  | 2.888      | -0.353  | -0.353 | 2.522   | 0.3625  | 0.363  | 0.015    | 36.25                                                                                | 36.3     | 1.5      | (26.078 to 47.251) |
| cg20533553 | 11  | 2464822         | 1.829         | 0.167 | 1.589      | -1.422  | -1.422 | 10.157  | 0.0805  | 0.081  | 1.20E-13 | 8.05                                                                                 | 8.1      | 1.20E-11 | (3.368 to 15.008)  |
| cg03371125 | 11  | 2464845         | 2.294         | 0.151 | 2.216      | -0.512  | -0.512 | 3.658   | 0.3055  | 0.3055 | 0.001    | 30.55                                                                                | 30.55    | 0.1      | (20.885 to 41.309) |
| cg01178971 | 11  | 2464851         | 1.294         | 0.278 | 1.617      | 1.147   | 1.147  | -8.193  | 0.1285  | 0.1285 | 9.69E-11 | 12.85                                                                                | 12.85    | 9.69E-09 | (6.495 to 21.311)  |
| cg04902871 | 11  | 2464954         | 1.479         | 0.271 | 1.44       | -0.142  | -0.142 | 1.013   | 0.444   | 0.444  | 0.316    | 44.4                                                                                 | 44.4     | 31.6     | (33.683 to 55.413) |
| cg19698309 | 11  | 2464959         | 2.623         | 0.184 | 2.399      | -1.207  | -1.207 | 8.619   | 0.1165  | 0.1165 | 2.19E-11 | 11.65                                                                                | 11.65    | 2.19E-09 | (5.678 to 19.816)  |
| cg23267890 | 11  | 2464970         | 0.416         | 0.196 | 0.282      | -0.676  | -0.676 | 4.83    | 0.251   | 0.251  | 1.38E-05 | 25.1                                                                                 | 25.1     | 0.00138  | (16.145 to 35.494) |
| cg15932136 | 11  | 2465028         | 0.465         | 0.194 | 0.683      | 1.114   | 1.113  | -7.954  | 0.1355  | 0.1355 | 2.25E-10 | 13.55                                                                                | 13.55    | 2.25E-08 | (6.992 to 22.183)  |
| cg10678459 | 11  | 2465103         | 1.958         | 0.243 | 1.671      | -1.173  | -1.173 | 8.38    | 0.123   | 0.1235 | 5.05E-11 | 12.3                                                                                 | 12.35    | 5.05E-09 | (6.127 to 20.648)  |
| cg11025829 | 11  | 2465136         | -1.149        | 0.159 | -0.783     | 2.275   | 2.275  | -16.248 | 0.0135  | 0.0135 | 0        | 1.35                                                                                 | 1.35     | 0        | (0.236 to 3.897)   |
| cg11363972 | 11  | 2465249         | 0.353         | 0.176 | 0.013      | -1.911  | -1.911 | 13.648  | 0.031   | 0.031  | 0        | 3.1                                                                                  | 3.1      | 0        | (0.825 to 7.279)   |
| cg24079038 | 11  | 2465279         | -0.411        | 0.171 | -0.559     | -0.853  | -0.852 | 6.088   | 0.199   | 0.199  | 1.71E-07 | 19.9                                                                                 | 19.9     | 1.71E-05 | (11.842 to 29.716) |
| cg00283576 | 11  | 2465351         | -2.993        | 0.158 | -3.005     | -0.073  | -0.073 | 0.52    | 0.471   | 0.471  | 0.605    | 47.1                                                                                 | 47.1     | 60.5     | (36.286 to 58.094) |
| cg04104132 | 11  | 2465440         | -1.679        | 0.161 | -1.434     | 1.502   | 1.502  | -10.729 | 0.0695  | 0.07   | 1.87E-14 | 6.95                                                                                 | 7        | 1.87E-12 | (2.732 to 13.448)  |

|            |    |         |        |       |        |        |        |         |          |          |          |          |          |          |                     |
|------------|----|---------|--------|-------|--------|--------|--------|---------|----------|----------|----------|----------|----------|----------|---------------------|
| cg23623667 | 11 | 2465485 | -2.41  | 0.247 | -2.54  | -0.52  | -0.52  | 3.711   | 0.303    | 0.303    | 0.001    | 30.3     | 30.3     | 0.1      | (20.657 to 41.040)  |
| cg19779211 | 11 | 2465491 | -2.109 | 0.169 | -1.984 | 0.734  | 0.734  | -5.241  | 0.233    | 0.2335   | 3.37E-06 | 23.3     | 23.35    | 0.000337 | (14.648 to 33.551)  |
| cg04204548 | 11 | 2465887 | -3.12  | 0.218 | -3.217 | -0.439 | -0.439 | 3.132   | 0.3315   | 0.3315   | 0.003    | 33.15    | 33.15    | 0.3      | (23.221 to 44.028)  |
| cg09336947 | 11 | 2465950 | -3.316 | 0.538 | -3.274 | 0.077  | 0.077  | -0.551  | 0.4695   | 0.4695   | 0.584    | 46.95    | 46.95    | 58.4     | (36.125 to 57.929)  |
| cg05302416 | 11 | 2466037 | -2.428 | 0.254 | -2.134 | 1.144  | 1.144  | -8.17   | 0.129    | 0.129    | 1.05E-10 | 12.9     | 12.9     | 1.05E-08 | (6.542 to 21.395)   |
| cg07127259 | 11 | 2466042 | -3.108 | 0.254 | -2.639 | 1.829  | 1.829  | -13.062 | 0.0365   | 0.037    | 0        | 3.65     | 3.7      | 0        | (1.068 to 8.294)    |
| cg26417642 | 11 | 2466095 | -3.593 | 0.222 | -3.518 | 0.336  | 0.336  | -2.401  | 0.369    | 0.369    | 0.02     | 36.9     | 36.9     | 2        | (26.659 to 47.895)  |
| cg06533200 | 11 | 2466138 | -4.252 | 0.343 | -4.024 | 0.657  | 0.657  | -4.695  | 0.257    | 0.257    | 2.19E-05 | 25.7     | 25.7     | 0.00219  | (16.658 to 36.148)  |
| cg05760393 | 11 | 2466141 | -4.033 | 0.395 | -4.208 | -0.44  | -0.44  | 3.145   | 0.331    | 0.331    | 0.003    | 33.1     | 33.1     | 0.3      | (23.165 to 43.964)  |
| cg17575811 | 11 | 2466409 | -2.76  | 0.227 | -2.858 | -0.425 | -0.425 | 3.036   | 0.3365   | 0.3365   | 0.004    | 33.65    | 33.65    | 0.4      | (23.660 to 44.530)  |
| cg13071812 | 11 | 2466788 | -2.893 | 0.112 | -2.875 | 0.155  | 0.155  | -1.11   | 0.4385   | 0.4385   | 0.272    | 43.85    | 43.85    | 27.2     | (33.173 to 54.882)  |
| cg05418487 | 11 | 2466889 | -3.502 | 0.164 | -3.474 | 0.166  | 0.166  | -1.184  | 0.4345   | 0.4345   | 0.242    | 43.45    | 43.45    | 24.2     | (32.791 to 54.483)  |
| cg12578166 | 11 | 2466909 | -1.934 | 0.126 | -1.295 | 5.011  | 5.01   | -35.788 | 3.72E-06 | 3.89E-06 | 0        | 0.000372 | 0.000389 | 0        | (6.20E-08 to 0.003) |
| cg08895013 | 11 | 2468332 | -2.794 | 0.155 | -2.07  | 4.638  | 4.637  | -33.12  | 1.33E-05 | 1.37E-05 | 0        | 0.001325 | 0.00137  | 0        | (9.12E-07 to 0.010) |
| cg13298691 | 11 | 2470675 | 3.488  | 0.286 | 3.903  | 1.436  | 1.435  | -10.252 | 0.0785   | 0.079    | 8.75E-14 | 7.85     | 7.9      | 8.75E-12 | (3.255 to 14.740)   |
| cg18016139 | 11 | 2470969 | 2.795  | 0.19  | 2.944  | 0.774  | 0.774  | -5.529  | 0.2215   | 0.2215   | 1.24E-06 | 22.15    | 22.15    | 0.000124 | (13.653 to 32.222)  |
| cg27364242 | 11 | 2471064 | 1.834  | 0.135 | 2.098  | 1.935  | 1.935  | -13.821 | 0.0295   | 0.0295   | 0        | 2.95     | 2.95     | 0        | (0.763 to 6.999)    |
| cg10673351 | 11 | 2471097 | 2.512  | 0.183 | 2.324  | -1.016 | -1.016 | 7.255   | 0.1575   | 0.1575   | 2.67E-09 | 15.75    | 15.75    | 2.67E-07 | (8.598 to 24.848)   |
| cg06159548 | 11 | 2481370 | 2.064  | 0.151 | 2.272  | 1.373  | 1.373  | -9.806  | 0.088    | 0.088    | 3.84E-13 | 8.8      | 8.8      | 3.84E-11 | (3.814 to 16.024)   |
| cg26524638 | 11 | 2481449 | 2.715  | 0.192 | 2.726  | 0.056  | 0.056  | -0.397  | 0.478    | 0.478    | 0.693    | 47.8     | 47.8     | 69.3     | (36.945 to 58.765)  |
| cg03600094 | 11 | 2481475 | 1.994  | 0.222 | 2.349  | 1.58   | 1.579  | -11.281 | 0.0605   | 0.0605   | 3.11E-15 | 6.05     | 6.05     | 3.11E-13 | (2.215 to 12.058)   |
| cg25976755 | 11 | 2481495 | 2.812  | 0.189 | 2.847  | 0.187  | 0.187  | -1.339  | 0.426    | 0.426    | 0.187    | 42.6     | 42.6     | 18.7     | (31.985 to 53.636)  |
| cg17341170 | 11 | 2481545 | 2.694  | 0.149 | 2.719  | 0.165  | 0.165  | -1.179  | 0.435    | 0.435    | 0.244    | 43.5     | 43.5     | 24.4     | (32.814 to 54.507)  |
| cg25513073 | 11 | 2481641 | 2.14   | 0.146 | 1.934  | -1.398 | -1.398 | 9.983   | 0.084    | 0.0845   | 2.13E-13 | 8.4      | 8.45     | 2.13E-11 | (3.584 to 15.506)   |
| cg03365111 | 11 | 2481857 | 2.888  | 0.196 | 2.901  | 0.065  | 0.065  | -0.462  | 0.4745   | 0.4745   | 0.646    | 47.45    | 47.45    | 64.6     | (36.599 to 58.413)  |
| cg16145209 | 11 | 2481909 | 2.142  | 0.128 | 2.201  | 0.457  | 0.457  | -3.267  | 0.3245   | 0.325    | 0.002    | 32.45    | 32.5     | 0.2      | (22.613 to 43.328)  |
| cg23968213 | 11 | 2481965 | 2.031  | 0.166 | 2.272  | 1.446  | 1.446  | -10.325 | 0.0775   | 0.0775   | 6.88E-14 | 7.75     | 7.75     | 6.88E-12 | (3.170 to 14.536)   |
| cg03170016 | 11 | 2482142 | 1.382  | 0.134 | 1.479  | 0.722  | 0.722  | -5.155  | 0.237    | 0.237    | 4.53E-06 | 23.7     | 23.7     | 0.000453 | (14.954 to 33.953)  |
| cg25741120 | 11 | 2482223 | 2.869  | 0.202 | 2.737  | -0.647 | -0.647 | 4.62    | 0.2605   | 0.2605   | 2.81E-05 | 26.05    | 26.05    | 0.00281  | (16.944 to 36.509)  |
| cg03118430 | 11 | 2482233 | 3.114  | 0.235 | 3.353  | 1.006  | 1.006  | -7.184  | 0.1595   | 0.16     | 3.44E-09 | 15.95    | 16       | 3.44E-07 | (8.776 to 25.131)   |
| cg26709929 | 11 | 2482240 | 2.711  | 0.287 | 2.96   | 0.859  | 0.859  | -6.134  | 0.1975   | 0.1975   | 1.45E-07 | 19.75    | 19.75    | 1.45E-05 | (11.700 to 29.513)  |

|            |    |         |        |       |        |        |        |         |          |          |          |          |          |          |                     |
|------------|----|---------|--------|-------|--------|--------|--------|---------|----------|----------|----------|----------|----------|----------|---------------------|
| cg17291157 | 11 | 2482284 | 2.36   | 0.227 | 2.474  | 0.498  | 0.498  | -3.559  | 0.31     | 0.3105   | 0.001    | 31       | 31.05    | 0.1      | (21.314 to 41.815)  |
| cg07210454 | 11 | 2482303 | 2.254  | 0.288 | 2.563  | 1.064  | 1.064  | -7.601  | 0.146    | 0.1465   | 7.81E-10 | 14.6     | 14.65    | 7.81E-08 | (7.772 to 23.504)   |
| cg13840782 | 11 | 2482394 | 3.042  | 0.246 | 2.797  | -0.987 | -0.987 | 7.047   | 0.1645   | 0.1645   | 5.60E-09 | 16.45    | 16.45    | 5.60E-07 | (9.124 to 25.679)   |
| cg09393494 | 11 | 2482401 | 2.347  | 0.167 | 2.192  | -0.92  | -0.92  | 6.573   | 0.181    | 0.181    | 3.04E-08 | 18.1     | 18.1     | 3.04E-06 | (10.407 to 27.633)  |
| cg25946538 | 11 | 2482531 | 1.631  | 0.123 | 1.422  | -1.683 | -1.683 | 12.022  | 0.0495   | 0.0495   | 4.44E-16 | 4.95     | 4.95     | 4.44E-14 | (1.651 to 10.362)   |
| cg11878045 | 11 | 2482536 | 1.894  | 0.153 | 1.478  | -2.685 | -2.685 | 19.176  | 0.005    | 0.005    | 0        | 0.5      | 0.5      | 0        | (0.046 to 1.761)    |
| cg25266888 | 11 | 2482594 | 2.264  | 0.219 | 2.008  | -1.161 | -1.161 | 8.29    | 0.1255   | 0.126    | 6.91E-11 | 12.55    | 12.6     | 6.91E-09 | (6.302 to 20.966)   |
| cg23801748 | 11 | 2482735 | 3.333  | 0.204 | 3.448  | 0.557  | 0.556  | -3.974  | 0.29     | 0.2905   | 0        | 29       | 29.05    | 0        | (19.541 to 39.705)  |
| cg27639104 | 11 | 2482929 | 3.264  | 0.24  | 3.346  | 0.335  | 0.335  | -2.393  | 0.3695   | 0.3695   | 0.021    | 36.95    | 36.95    | 2.1      | (26.700 to 47.939)  |
| cg24376802 | 11 | 2485050 | 2.301  | 0.137 | 2.332  | 0.226  | 0.226  | -1.615  | 0.411    | 0.411    | 0.113    | 41.1     | 41.1     | 11.3     | (30.568 to 52.134)  |
| cg26504274 | 11 | 2485409 | 3.557  | 0.214 | 3.818  | 1.21   | 1.21   | -8.643  | 0.116    | 0.116    | 2.02E-11 | 11.6     | 11.6     | 2.02E-09 | (5.636 to 19.736)   |
| cg01734338 | 11 | 2491231 | 1.889  | 0.247 | 1.89   | 0.003  | 0.003  | -0.02   | 0.499    | 0.499    | 0.984    | 49.9     | 49.9     | 98.4     | (38.972 to 60.807)  |
| cg09916212 | 11 | 2498390 | 3.184  | 0.282 | 2.805  | -1.327 | -1.327 | 9.478   | 0.0955   | 0.0955   | 1.16E-12 | 9.55     | 9.55     | 1.16E-10 | (4.273 to 17.019)   |
| cg01298120 | 11 | 2499341 | 3.167  | 0.182 | 3.399  | 1.263  | 1.263  | -9.023  | 0.106    | 0.1065   | 5.45E-12 | 10.6     | 10.65    | 5.45E-10 | (4.978 to 18.464)   |
| cg07618453 | 11 | 2502181 | -2.183 | 0.245 | -2.782 | -2.426 | -2.426 | 17.328  | 0.0095   | 0.0095   | 0        | 0.95     | 0.95     | 0        | (0.133 to 2.941)    |
| cg19670883 | 11 | 2502357 | -1.985 | 0.275 | -2.759 | -2.79  | -2.789 | 19.924  | 0.0035   | 0.004    | 0        | 0.35     | 0.4      | 0        | (0.030 to 1.415)    |
| cg05125641 | 11 | 2503306 | 2.209  | 0.198 | 1.919  | -1.452 | -1.452 | 10.372  | 0.0765   | 0.0765   | 5.91E-14 | 7.65     | 7.65     | 5.91E-12 | (3.117 to 14.408)   |
| cg17035132 | 11 | 2504160 | 2.395  | 0.138 | 2.595  | 1.439  | 1.439  | -10.276 | 0.0785   | 0.0785   | 8.08E-14 | 7.85     | 7.85     | 8.08E-12 | (3.227 to 14.672)   |
| cg06838584 | 11 | 2504581 | 2.926  | 0.309 | 3.223  | 0.951  | 0.951  | -6.792  | 0.173    | 0.173    | 1.39E-08 | 17.3     | 17.3     | 1.39E-06 | (9.800 to 26.720)   |
| cg23272088 | 11 | 2504813 | 2.913  | 0.297 | 3.54   | 2.091  | 2.091  | -14.935 | 0.021    | 0.021    | 0        | 2.1      | 2.1      | 0        | (0.454 to 5.393)    |
| cg11652182 | 11 | 2542384 | 2.981  | 0.213 | 3.138  | 0.73   | 0.73   | -5.217  | 0.2345   | 0.2345   | 3.66E-06 | 23.45    | 23.45    | 0.000366 | (14.734 to 33.664)  |
| cg04719766 | 11 | 2542580 | 2.98   | 0.206 | 2.593  | -1.862 | -1.862 | 13.297  | 0.0345   | 0.0345   | 0        | 3.45     | 3.45     | 0        | (0.964 to 7.874)    |
| cg17229197 | 11 | 2542688 | 2.696  | 0.195 | 2.932  | 1.196  | 1.196  | -8.544  | 0.1185   | 0.119    | 2.85E-11 | 11.85    | 11.9     | 2.85E-09 | (5.817 to 20.075)   |
| cg12949760 | 11 | 2542862 | -0.507 | 0.229 | -1.563 | -4.562 | -4.561 | 32.581  | 1.71E-05 | 1.77E-05 | 0        | 0.001705 | 0.001765 | 0        | (1.53E-06 to 0.013) |
| cg24073146 | 11 | 2543204 | 2.709  | 0.176 | 2.659  | -0.281 | -0.281 | 2.006   | 0.39     | 0.39     | 0.05     | 39       | 39       | 5        | (28.603 to 50.022)  |
| cg02097203 | 11 | 2548282 | -2.992 | 0.229 | -3.298 | -1.322 | -1.322 | 9.441   | 0.096    | 0.0965   | 1.31E-12 | 9.6      | 9.65     | 1.31E-10 | (4.327 to 17.133)   |
| cg12520982 | 11 | 2548920 | 1.877  | 0.144 | 2.122  | 1.688  | 1.688  | -12.058 | 0.049    | 0.049    | 4.44E-16 | 4.9      | 4.9      | 4.44E-14 | (1.628 to 10.286)   |
| cg18450293 | 11 | 2548955 | 2.944  | 0.256 | 3.006  | 0.238  | 0.238  | -1.697  | 0.4065   | 0.4065   | 0.096    | 40.65    | 40.65    | 9.6      | (30.154 to 51.692)  |
| cg25554751 | 11 | 2548989 | 2.758  | 0.148 | 2.622  | -0.913 | -0.913 | 6.518   | 0.183    | 0.183    | 3.70E-08 | 18.3     | 18.3     | 3.70E-06 | (10.564 to 27.865)  |
| cg04666029 | 11 | 2552843 | -2.43  | 0.117 | -2.22  | 1.774  | 1.773  | -12.666 | 0.041    | 0.0415   | 0        | 4.1      | 4.15     | 0        | (1.265 to 9.040)    |
| cg26512142 | 11 | 2554198 | -2.9   | 0.091 | -2.865 | 0.39   | 0.39   | -2.786  | 0.349    | 0.349    | 0.008    | 34.9     | 34.9     | 0.8      | (24.824 to 45.848)  |

|            |    |         |        |       |        |        |        |         |        |        |          |       |       |          |                     |
|------------|----|---------|--------|-------|--------|--------|--------|---------|--------|--------|----------|-------|-------|----------|---------------------|
| cg24089935 | 11 | 2554295 | -3.53  | 0.248 | -3.517 | 0.05   | 0.05   | -0.36   | 0.48   | 0.48   | 0.72     | 48    | 48    | 72       | (37.144 to 58.967)  |
| cg16465939 | 11 | 2554410 | -1.797 | 0.142 | -2.401 | -4.21  | -4.209 | 30.062  | 0      | 0      | 0        | 0     | 0     | 0        | (1.43E-05 to 0.038) |
| cg04608933 | 11 | 2554801 | 0.918  | 0.158 | 0.828  | -0.568 | -0.567 | 4.053   | 0.2865 | 0.2865 | 0        | 28.65 | 28.65 | 0        | (19.214 to 39.310)  |
| cg18729298 | 11 | 2555203 | -1.681 | 0.177 | -1.463 | 1.216  | 1.216  | -8.682  | 0.115  | 0.115  | 1.76E-11 | 11.5  | 11.5  | 1.76E-09 | (5.564 to 19.600)   |
| cg07824422 | 11 | 2555406 | -0.57  | 0.154 | -0.856 | -1.837 | -1.837 | 13.121  | 0.036  | 0.036  | 0        | 3.6   | 3.6   | 0        | (1.041 to 8.188)    |
| cg02258534 | 11 | 2555497 | 0.437  | 0.185 | 0.665  | 1.224  | 1.224  | -8.74   | 0.1135 | 0.1135 | 1.44E-11 | 11.35 | 11.35 | 1.44E-09 | (5.462 to 19.406)   |
| cg05898618 | 11 | 2555576 | 1.985  | 0.391 | 2.394  | 1.033  | 1.033  | -7.378  | 0.1535 | 0.1535 | 1.73E-09 | 15.35 | 15.35 | 1.73E-07 | (8.299 to 24.368)   |
| cg19255554 | 11 | 2556743 | 1.547  | 0.152 | 1.403  | -0.937 | -0.937 | 6.693   | 0.1765 | 0.1765 | 1.98E-08 | 17.65 | 17.65 | 1.98E-06 | (10.072 to 27.132)  |
| cg07640406 | 11 | 2558029 | 2.386  | 0.172 | 2.625  | 1.372  | 1.372  | -9.797  | 0.088  | 0.0885 | 3.96E-13 | 8.8   | 8.85  | 3.96E-11 | (3.826 to 16.051)   |
| cg27246251 | 11 | 2559736 | 2.316  | 0.129 | 2.436  | 0.92   | 0.92   | -6.571  | 0.181  | 0.181  | 3.06E-08 | 18.1  | 18.1  | 3.06E-06 | (10.412 to 27.640)  |
| cg02335306 | 11 | 2559880 | 2.904  | 0.183 | 3.114  | 1.141  | 1.141  | -8.148  | 0.1295 | 0.13   | 1.13E-10 | 12.95 | 13    | 1.13E-08 | (6.586 to 21.472)   |
| cg22296808 | 11 | 2560641 | 2.051  | 0.136 | 1.918  | -0.974 | -0.974 | 6.956   | 0.1675 | 0.1675 | 7.76E-09 | 16.75 | 16.75 | 7.76E-07 | (9.362 to 26.049)   |
| cg07549149 | 11 | 2560783 | 2.444  | 0.267 | 2.173  | -1.003 | -1.002 | 7.16    | 0.1605 | 0.1605 | 3.75E-09 | 16.05 | 16.05 | 3.75E-07 | (8.837 to 25.227)   |
| cg22047766 | 11 | 2560864 | 2.711  | 0.181 | 2.544  | -0.914 | -0.913 | 6.524   | 0.1825 | 0.183  | 3.63E-08 | 18.25 | 18.3  | 3.63E-06 | (10.547 to 27.840)  |
| cg03030994 | 11 | 2562310 | 2.347  | 0.176 | 2.46   | 0.637  | 0.637  | -4.549  | 0.2635 | 0.2635 | 3.56E-05 | 26.35 | 26.35 | 0.00356  | (17.220 to 36.855)  |
| cg26929889 | 11 | 2562496 | 3.129  | 0.183 | 3.173  | 0.239  | 0.239  | -1.704  | 0.406  | 0.406  | 0.095    | 40.6  | 40.6  | 9.5      | (30.116 to 51.651)  |
| cg19388050 | 11 | 2562647 | 3.175  | 0.252 | 3.183  | 0.031  | 0.031  | -0.222  | 0.4875 | 0.4875 | 0.826    | 48.75 | 48.75 | 82.6     | (37.888 to 59.719)  |
| cg17255148 | 11 | 2563802 | 2.612  | 0.229 | 2.442  | -0.738 | -0.738 | 5.272   | 0.232  | 0.232  | 3.03E-06 | 23.2  | 23.2  | 0.000303 | (14.539 to 33.407)  |
| cg26884837 | 11 | 2563897 | 2.364  | 0.293 | 1.9    | -1.567 | -1.567 | 11.194  | 0.0615 | 0.062  | 4.22E-15 | 6.15  | 6.2   | 4.22E-13 | (2.291 to 12.271)   |
| cg03905757 | 11 | 2566193 | 1.99   | 0.298 | 2.029  | 0.128  | 0.128  | -0.913  | 0.4495 | 0.4495 | 0.366    | 44.95 | 44.95 | 36.6     | (34.209 to 55.959)  |
| cg20850984 | 11 | 2569120 | 2.615  | 0.246 | 2.574  | -0.165 | -0.165 | 1.179   | 0.435  | 0.435  | 0.244    | 43.5  | 43.5  | 24.4     | (32.813 to 54.505)  |
| cg17494446 | 11 | 2569380 | 3.195  | 0.207 | 2.825  | -1.77  | -1.77  | 12.644  | 0.0415 | 0.0415 | 0        | 4.15  | 4.15  | 0        | (1.277 to 9.084)    |
| cg23545049 | 11 | 2569474 | 2.573  | 0.275 | 2.598  | 0.088  | 0.088  | -0.63   | 0.465  | 0.465  | 0.532    | 46.5  | 46.5  | 53.2     | (35.707 to 57.502)  |
| cg26639864 | 11 | 2569788 | 2.902  | 0.229 | 2.768  | -0.581 | -0.581 | 4.148   | 0.282  | 0.282  | 0        | 28.2  | 28.2  | 0        | (18.824 to 38.836)  |
| cg08419850 | 11 | 2569801 | 3.411  | 0.176 | 3.53   | 0.67   | 0.669  | -4.782  | 0.253  | 0.253  | 1.63E-05 | 25.3  | 25.3  | 0.00163  | (16.327 to 35.727)  |
| cg20768429 | 11 | 2569832 | 3.183  | 0.261 | 3.493  | 1.177  | 1.177  | -8.405  | 0.1225 | 0.1225 | 4.62E-11 | 12.25 | 12.25 | 4.62E-09 | (6.078 to 20.558)   |
| cg09197492 | 11 | 2571399 | 2.773  | 0.231 | 2.844  | 0.303  | 0.303  | -2.163  | 0.3815 | 0.3815 | 0.035    | 38.15 | 38.15 | 3.5      | (27.822 to 49.172)  |
| cg15074690 | 11 | 2571484 | 2.478  | 0.18  | 2.855  | 2.07   | 2.069  | -14.78  | 0.022  | 0.022  | 0        | 2.2   | 2.2   | 0        | (0.489 to 5.596)    |
| cg09390414 | 11 | 2571525 | 3.137  | 0.246 | 3.175  | 0.151  | 0.151  | -1.08   | 0.44   | 0.44   | 0.286    | 44    | 44    | 28.6     | (33.333 to 55.049)  |
| cg03820779 | 11 | 2573972 | 2.831  | 0.218 | 2.906  | 0.344  | 0.344  | -2.454  | 0.3665 | 0.3665 | 0.018    | 36.65 | 36.65 | 1.8      | (26.404 to 47.612)  |
| cg09254350 | 11 | 2574026 | 3.136  | 0.251 | 3.561  | 1.673  | 1.672  | -11.944 | 0.0505 | 0.0505 | 4.44E-16 | 5.05  | 5.05  | 4.44E-14 | (1.704 to 10.531)   |



|            |    |         |       |       |       |        |        |         |        |        |          |       |       |          |                    |
|------------|----|---------|-------|-------|-------|--------|--------|---------|--------|--------|----------|-------|-------|----------|--------------------|
| cg00382572 | 11 | 2574042 | 2.58  | 0.277 | 2.597 | 0.061  | 0.061  | -0.435  | 0.476  | 0.476  | 0.665    | 47.6  | 47.6  | 66.5     | (36.742 to 58.558) |
| cg14947466 | 11 | 2583705 | 2.382 | 0.156 | 2.361 | -0.133 | -0.133 | 0.953   | 0.447  | 0.447  | 0.345    | 44.7  | 44.7  | 34.5     | (33.998 to 55.740) |
| cg26344859 | 11 | 2584629 | 2.515 | 0.143 | 2.462 | -0.367 | -0.367 | 2.622   | 0.3575 | 0.3575 | 0.012    | 35.75 | 35.75 | 1.2      | (25.599 to 46.717) |
| cg12424548 | 11 | 2591932 | 1.919 | 0.242 | 1.551 | -1.502 | -1.502 | 10.728  | 0.0695 | 0.07   | 1.87E-14 | 6.95  | 7     | 1.87E-12 | (2.733 to 13.450)  |
| cg08007665 | 11 | 2593857 | 2.135 | 0.194 | 2.404 | 1.371  | 1.37   | -9.789  | 0.0885 | 0.0885 | 4.06E-13 | 8.85  | 8.85  | 4.06E-11 | (3.836 to 16.074)  |
| cg26750319 | 11 | 2593960 | 2.736 | 0.153 | 2.823 | 0.565  | 0.565  | -4.037  | 0.287  | 0.2875 | 0        | 28.7  | 28.75 | 0        | (19.281 to 39.392) |
| cg13536051 | 11 | 2594099 | 2.189 | 0.199 | 2.407 | 1.085  | 1.084  | -7.746  | 0.1415 | 0.142  | 4.68E-10 | 14.15 | 14.2  | 4.68E-08 | (7.443 to 22.954)  |
| cg20751395 | 11 | 2594153 | 2.607 | 0.159 | 2.667 | 0.37   | 0.37   | -2.642  | 0.3565 | 0.3565 | 0.011    | 35.65 | 35.65 | 1.1      | (25.504 to 46.611) |
| cg13145504 | 11 | 2594840 | 1.294 | 0.18  | 1.343 | 0.272  | 0.272  | -1.94   | 0.3935 | 0.3935 | 0.058    | 39.35 | 39.35 | 5.8      | (28.928 to 50.374) |
| cg24492694 | 11 | 2595605 | 3.002 | 0.376 | 3.291 | 0.761  | 0.761  | -5.438  | 0.225  | 0.225  | 1.70E-06 | 22.5  | 22.5  | 0.00017  | (13.961 to 32.637) |
| cg23049234 | 11 | 2595718 | 2.821 | 0.183 | 2.792 | -0.16  | -0.16  | 1.141   | 0.437  | 0.437  | 0.26     | 43.7  | 43.7  | 26       | (33.014 to 54.716) |
| cg12223985 | 11 | 2595800 | 2.971 | 0.211 | 2.903 | -0.318 | -0.318 | 2.271   | 0.376  | 0.376  | 0.028    | 37.6  | 37.6  | 2.8      | (27.295 to 48.595) |
| cg06047778 | 11 | 2596300 | 2.62  | 0.129 | 2.15  | -3.597 | -3.597 | 25.69   | 0.0005 | 0.0005 | 0        | 0.05  | 0.05  | 0        | (0.001 to 0.211)   |
| cg06960356 | 11 | 2596416 | 3.129 | 0.247 | 3.231 | 0.408  | 0.408  | -2.916  | 0.3425 | 0.3425 | 0.005    | 34.25 | 34.25 | 0.5      | (24.215 to 45.161) |
| cg01616349 | 11 | 2596468 | 2.371 | 0.164 | 2.393 | 0.131  | 0.131  | -0.936  | 0.448  | 0.448  | 0.354    | 44.8  | 44.8  | 35.4     | (34.088 to 55.834) |
| cg18865126 | 11 | 2596606 | 2.248 | 0.183 | 2.401 | 0.83   | 0.83   | -5.93   | 0.205  | 0.2055 | 3.00E-07 | 20.5  | 20.55 | 3.00E-05 | (12.336 to 30.412) |
| cg20124933 | 11 | 2597564 | 3.189 | 0.298 | 3.331 | 0.471  | 0.471  | -3.361  | 0.32   | 0.32   | 0.002    | 32    | 32    | 0.2      | (22.190 to 42.838) |
| cg20170839 | 11 | 2597721 | 2.695 | 0.143 | 2.496 | -1.372 | -1.371 | 9.795   | 0.088  | 0.0885 | 3.98E-13 | 8.8   | 8.85  | 3.98E-11 | (3.829 to 16.057)  |
| cg00243281 | 11 | 2597838 | 1.781 | 0.169 | 1.996 | 1.257  | 1.256  | -8.974  | 0.1075 | 0.1075 | 6.44E-12 | 10.75 | 10.75 | 6.44E-10 | (5.059 to 18.625)  |
| cg24609402 | 11 | 2598247 | 2.738 | 0.174 | 2.835 | 0.552  | 0.552  | -3.944  | 0.2915 | 0.2915 | 0        | 29.15 | 29.15 | 0        | (19.668 to 39.858) |
| cg06873192 | 11 | 2598347 | 2.207 | 0.147 | 2.313 | 0.709  | 0.709  | -5.064  | 0.241  | 0.241  | 6.22E-06 | 24.1  | 24.1  | 0.000622 | (15.284 to 34.384) |
| cg26411299 | 11 | 2598653 | 2.6   | 0.194 | 2.395 | -1.045 | -1.044 | 7.46    | 0.1505 | 0.151  | 1.29E-09 | 15.05 | 15.1  | 1.29E-07 | (8.103 to 24.050)  |
| cg25223664 | 11 | 2600975 | 1.765 | 0.16  | 2.036 | 1.675  | 1.675  | -11.965 | 0.05   | 0.05   | 4.44E-16 | 5     | 5     | 4.44E-14 | (1.690 to 10.486)  |
| cg13612693 | 11 | 2602171 | 2.398 | 0.138 | 2.113 | -2.052 | -2.051 | 14.651  | 0.023  | 0.023  | 0        | 2.3   | 2.3   | 0        | (0.520 to 5.771)   |
| cg16412789 | 11 | 2602926 | 3.334 | 0.205 | 3.356 | 0.104  | 0.104  | -0.746  | 0.4585 | 0.4585 | 0.459    | 45.85 | 45.85 | 45.9     | (35.089 to 56.867) |
| cg22195512 | 11 | 2602980 | 2.082 | 0.124 | 2.085 | 0.026  | 0.026  | -0.189  | 0.4895 | 0.4895 | 0.851    | 48.95 | 48.95 | 85.1     | (38.062 to 59.894) |
| cg06827779 | 11 | 2603011 | 2.533 | 0.185 | 2.591 | 0.312  | 0.312  | -2.229  | 0.378  | 0.378  | 0.03     | 37.8  | 37.8  | 3        | (27.498 to 48.818) |
| cg04211344 | 11 | 2603221 | 2.815 | 0.167 | 2.894 | 0.467  | 0.467  | -3.333  | 0.3215 | 0.3215 | 0.002    | 32.15 | 32.15 | 0.2      | (22.316 to 42.984) |
| cg06264108 | 11 | 2603429 | 3.276 | 0.183 | 3.071 | -1.107 | -1.107 | 7.908   | 0.137  | 0.137  | 2.64E-10 | 13.7  | 13.7  | 2.64E-08 | (7.089 to 22.350)  |
| cg23040992 | 11 | 2603590 | 2.654 | 0.19  | 2.779 | 0.649  | 0.649  | -4.634  | 0.2595 | 0.26   | 2.68E-05 | 25.95 | 26    | 0.00268  | (16.890 to 36.440) |
| cg19030519 | 11 | 2604365 | 1.964 | 0.124 | 2.101 | 1.094  | 1.094  | -7.812  | 0.1395 | 0.14   | 3.71E-10 | 13.95 | 14    | 3.71E-08 | (7.298 to 22.707)  |

|            |    |         |        |       |        |        |        |         |        |        |          |       |       |          |                    |
|------------|----|---------|--------|-------|--------|--------|--------|---------|--------|--------|----------|-------|-------|----------|--------------------|
| cg25175863 | 11 | 2604391 | 1.329  | 0.117 | 1.557  | 1.943  | 1.942  | -13.875 | 0.029  | 0.029  | 0        | 2.9   | 2.9   | 0        | (0.745 to 6.914)   |
| cg20921686 | 11 | 2604499 | 2.549  | 0.196 | 2.136  | -2.094 | -2.094 | 14.957  | 0.0205 | 0.021  | 0        | 2.05  | 2.1   | 0        | (0.449 to 5.364)   |
| cg12263990 | 11 | 2606365 | 2.733  | 0.158 | 3.003  | 1.696  | 1.696  | -12.111 | 0.048  | 0.048  | 2.22E-16 | 4.8   | 4.8   | 2.22E-14 | (1.592 to 10.171)  |
| cg08861541 | 11 | 2610149 | 3.12   | 0.196 | 3.025  | -0.48  | -0.479 | 3.424   | 0.317  | 0.317  | 0.001    | 31.7  | 31.7  | 0.1      | (21.908 to 42.510) |
| cg16222896 | 11 | 2610580 | 2.883  | 0.209 | 3.145  | 1.242  | 1.242  | -8.868  | 0.11   | 0.11   | 9.28E-12 | 11    | 11    | 9.28E-10 | (5.239 to 18.976)  |
| cg20828897 | 11 | 2610595 | 2.656  | 0.228 | 2.862  | 0.896  | 0.896  | -6.399  | 0.1875 | 0.1875 | 5.65E-08 | 18.75 | 18.75 | 5.65E-06 | (10.907 to 28.369) |
| cg26728427 | 11 | 2610741 | 2.681  | 0.161 | 2.7    | 0.118  | 0.118  | -0.839  | 0.4535 | 0.4535 | 0.405    | 45.35 | 45.35 | 40.5     | (34.596 to 56.359) |
| cg09315662 | 11 | 2612781 | 2.277  | 0.141 | 2.27   | -0.051 | -0.051 | 0.366   | 0.4795 | 0.4795 | 0.716    | 47.95 | 47.95 | 71.6     | (37.111 to 58.933) |
| cg21695475 | 11 | 2612825 | 2.45   | 0.18  | 2.536  | 0.476  | 0.475  | -3.396  | 0.3185 | 0.3185 | 0.001    | 31.85 | 31.85 | 0.1      | (22.035 to 42.658) |
| cg13742956 | 11 | 2612876 | 2.34   | 0.192 | 2.351  | 0.059  | 0.058  | -0.418  | 0.477  | 0.477  | 0.678    | 47.7  | 47.7  | 67.8     | (36.835 to 58.653) |
| cg19323901 | 11 | 2614062 | 2.269  | 0.135 | 2.361  | 0.676  | 0.675  | -4.825  | 0.251  | 0.2515 | 1.41E-05 | 25.1  | 25.15 | 0.00141  | (16.165 to 35.521) |
| cg14089425 | 11 | 2616834 | 2.217  | 0.445 | 2.379  | 0.36   | 0.359  | -2.568  | 0.3605 | 0.3605 | 0.013    | 36.05 | 36.05 | 1.3      | (25.860 to 47.008) |
| cg25786675 | 11 | 2621273 | 3.082  | 0.206 | 3.441  | 1.724  | 1.723  | -12.31  | 0.0455 | 0.0455 | 0        | 4.55  | 4.55  | 0        | (1.468 to 9.754)   |
| cg07040680 | 11 | 2621365 | 1.847  | 0.189 | 2.099  | 1.32   | 1.32   | -9.427  | 0.0965 | 0.0965 | 1.37E-12 | 9.65  | 9.65  | 1.37E-10 | (4.347 to 17.174)  |
| cg07003739 | 11 | 2640527 | 1.609  | 0.158 | 1.517  | -0.578 | -0.578 | 4.126   | 0.283  | 0.283  | 0        | 28.3  | 28.3  | 0        | (18.911 to 38.943) |
| cg02021157 | 11 | 2644078 | 2.209  | 0.176 | 2.512  | 1.712  | 1.711  | -12.225 | 0.0465 | 0.0465 | 2.22E-16 | 4.65  | 4.65  | 2.22E-14 | (1.520 to 9.932)   |
| cg03660952 | 11 | 2644418 | 0.333  | 0.189 | 0.385  | 0.273  | 0.273  | -1.95   | 0.393  | 0.393  | 0.057    | 39.3  | 39.3  | 5.7      | (28.881 to 50.322) |
| cg19095714 | 11 | 2645098 | 3.246  | 0.365 | 3.2    | -0.125 | -0.125 | 0.89    | 0.4505 | 0.4505 | 0.378    | 45.05 | 45.05 | 37.8     | (34.329 to 56.083) |
| cg08249467 | 11 | 2646113 | 2.71   | 0.257 | 3.247  | 2.07   | 2.069  | -14.78  | 0.022  | 0.022  | 0        | 2.2   | 2.2   | 0        | (0.489 to 5.596)   |
| cg24932449 | 11 | 2672613 | 2.494  | 0.221 | 2.753  | 1.162  | 1.162  | -8.302  | 0.1255 | 0.1255 | 6.63E-11 | 12.55 | 12.55 | 6.63E-09 | (6.279 to 20.924)  |
| cg18477587 | 11 | 2672740 | 2.356  | 0.191 | 2.516  | 0.83   | 0.829  | -5.924  | 0.2055 | 0.2055 | 3.06E-07 | 20.55 | 20.55 | 3.06E-05 | (12.355 to 30.439) |
| cg07556018 | 11 | 2677341 | -0.604 | 0.237 | -0.437 | 0.697  | 0.697  | -4.977  | 0.2445 | 0.2445 | 8.38E-06 | 24.45 | 24.45 | 0.000838 | (15.600 to 34.795) |
| cg13428066 | 11 | 2677768 | -0.923 | 0.216 | -1.126 | -0.934 | -0.934 | 6.668   | 0.1775 | 0.1775 | 2.17E-08 | 17.75 | 17.75 | 2.17E-06 | (10.140 to 27.234) |
| cg05753930 | 11 | 2678450 | 2.639  | 0.248 | 2.832  | 0.771  | 0.77   | -5.503  | 0.2225 | 0.2225 | 1.35E-06 | 22.25 | 22.25 | 0.000135 | (13.740 to 32.340) |
| cg18106482 | 11 | 2680314 | 3.188  | 0.225 | 3.676  | 2.152  | 2.152  | -15.369 | 0.018  | 0.018  | 0        | 1.8   | 1.8   | 0        | (0.367 to 4.854)   |
| cg06585606 | 11 | 2680854 | 3.109  | 0.245 | 2.698  | -1.661 | -1.66  | 11.859  | 0.0515 | 0.0515 | 4.44E-16 | 5.15  | 5.15  | 4.44E-14 | (1.764 to 10.720)  |
| cg06914593 | 11 | 2684842 | 2.671  | 0.137 | 2.876  | 1.481  | 1.481  | -10.58  | 0.0725 | 0.0725 | 3.00E-14 | 7.25  | 7.25  | 3.00E-12 | (2.888 to 13.843)  |
| cg26190483 | 11 | 2689695 | 3.44   | 0.2   | 3.227  | -1.053 | -1.053 | 7.519   | 0.149  | 0.149  | 1.05E-09 | 14.9  | 14.9  | 1.05E-07 | (7.963 to 23.820)  |
| cg22239603 | 11 | 2690304 | 2.748  | 0.168 | 2.618  | -0.767 | -0.766 | 5.474   | 0.2235 | 0.2235 | 1.49E-06 | 22.35 | 22.35 | 0.000149 | (13.838 to 32.472) |
| cg13203297 | 11 | 2691249 | 2.94   | 0.196 | 3.224  | 1.433  | 1.433  | -10.234 | 0.079  | 0.079  | 9.28E-14 | 7.9   | 7.9   | 9.28E-12 | (3.276 to 14.791)  |
| cg15422307 | 11 | 2693503 | 1.454  | 0.211 | 2.104  | 3.047  | 3.047  | -21.762 | 0.002  | 0.002  | 0        | 0.2   | 0.2   | 0        | (0.009 to 0.805)   |



|            |    |         |        |       |        |         |         |         |          |          |          |          |          |          |                         |
|------------|----|---------|--------|-------|--------|---------|---------|---------|----------|----------|----------|----------|----------|----------|-------------------------|
| cg02219360 | 11 | 2721409 | -0.003 | 0.143 | -1.837 | -12.734 | -12.731 | 90.939  | 0        | 0        | 0        | 0        | 0        | 0        | (1.60E-51 to 6.99E-23)  |
| cg20699737 | 11 | 2721428 | 0.054  | 0.149 | -2.085 | -14.253 | -14.251 | 101.79  | 0        | 0        | 0        | 0        | 0        | 0        | (1.71E-64 to 1.07E-28)  |
| cg26547719 | 11 | 2721437 | -0.015 | 0.126 | -1.528 | -11.877 | -11.875 | 84.82   | 2.22E-16 | 3.33E-16 | 0        | 2.22E-14 | 3.33E-14 | 0        | (7.61E-45 to 6.93E-20)  |
| cg07595203 | 11 | 2721480 | -0.474 | 0.124 | -2.51  | -16.212 | -16.209 | 115.776 | 0        | 0        | 0        | 0        | 0        | 0        | (2.36E-83 to 3.81E-37)  |
| cg09518720 | 11 | 2721591 | 0.392  | 0.216 | -1.361 | -8.04   | -8.038  | 57.414  | 8.3E-11  | 9.65E-11 | 0        | 8.3E-09  | 9.65E-09 | 0        | (1.37E-20 to 5.71E-09)  |
| cg14958441 | 11 | 2721610 | -0.374 | 0.084 | -1.596 | -14.456 | -14.453 | 103.238 | 0        | 0        | 0        | 0        | 0        | 0        | (2.46E-66 to 1.60E-29)  |
| cg27323091 | 11 | 2721619 | 0.058  | 0.1   | -0.959 | -10.08  | -10.078 | 71.985  | 7.75E-14 | 9.8E-14  | 0        | 7.75E-12 | 9.8E-12  | 0        | (2.45E-32 to 2.89E-14)  |
| cg01873334 | 11 | 2721632 | 0.558  | 0.141 | -1.295 | -12.986 | -12.983 | 92.737  | 0        | 0        | 0        | 0        | 0        | 0        | (1.43E-53 to 8.42E-24)  |
| cg05816130 | 11 | 2721799 | 0.125  | 0.1   | -1.513 | -16.207 | -16.204 | 115.743 | 0        | 0        | 0        | 0        | 0        | 0        | (2.63E-83 to 4.00E-37)  |
| cg14243741 | 11 | 2721817 | 0.379  | 0.13  | -1.677 | -15.674 | -15.671 | 111.937 | 0        | 0        | 0        | 0        | 0        | 0        | (6.15E-78 to 1.01E-34)  |
| cg21137515 | 11 | 2721857 | 0.06   | 0.097 | -1.824 | -19.241 | -19.238 | 137.412 | 0        | 0        | 0        | 0        | 0        | 0        | (2.79E-117 to 2.50E-52) |
| cg05740879 | 11 | 2721866 | 0.174  | 0.104 | -1.716 | -17.913 | -17.91  | 127.928 | 0        | 0        | 0        | 0        | 0        | 0        | (1.06E-101 to 2.34E-45) |
| cg01893176 | 11 | 2721952 | -0.383 | 0.086 | -2.128 | -20.029 | -20.026 | 143.039 | 0        | 0        | 0        | 0        | 0        | 0        | (4.73E-127 to 1.07E-56) |
| cg11993252 | 11 | 2721961 | 0.26   | 0.119 | -0.931 | -9.932  | -9.93   | 70.926  | 1.27E-13 | 1.6E-13  | 0        | 1.27E-11 | 1.6E-11  | 0        | (2.14E-31 to 7.67E-14)  |
| cg26094482 | 11 | 2722073 | -0.277 | 0.118 | -2.047 | -14.832 | -14.829 | 105.919 | 0        | 0        | 0        | 0        | 0        | 0        | (8.24E-70 to 4.43E-31)  |
| cg26908876 | 11 | 2722076 | -0.266 | 0.129 | -2.882 | -20.123 | -20.119 | 143.704 | 0        | 0        | 0        | 0        | 0        | 0        | (3.14E-128 to 3.17E-57) |
| cg03422070 | 11 | 2722082 | 0.19   | 0.116 | -2.312 | -21.423 | -21.419 | 152.994 | 0        | 0        | 0        | 0        | 0        | 0        | (2.72E-145 to 7.45E-65) |
| cg15651941 | 11 | 2722084 | -0.071 | 0.135 | -1.965 | -13.841 | -13.839 | 98.847  | 0        | 0        | 0        | 0        | 0        | 0        | (7.84E-61 to 4.67E-27)  |
| cg25306939 | 11 | 2722086 | 0.036  | 0.107 | -2.316 | -21.735 | -21.73  | 155.215 | 0        | 0        | 0        | 0        | 0        | 0        | (1.57E-149 to 9.49E-67) |
| cg06288089 | 11 | 2722119 | -0.106 | 0.089 | -2.302 | -24.355 | -24.351 | 173.933 | 0        | 0        | 0        | 0        | 0        | 0        | (1.19E-187 to 8.64E-84) |
| cg02798157 | 11 | 2722195 | -0.097 | 0.113 | -1.931 | -16.122 | -16.118 | 115.132 | 0        | 0        | 0        | 0        | 0        | 0        | (1.97E-82 to 9.85E-37)  |
| cg27604721 | 11 | 2722258 | 0.406  | 0.132 | -1.616 | -15.18  | -15.177 | 108.405 | 0        | 0        | 0        | 0        | 0        | 0        | (4.10E-73 to 1.47E-32)  |
| cg12433386 | 11 | 2722340 | 1.167  | 0.217 | -0.602 | -8.079  | -8.078  | 57.698  | 7.25E-11 | 8.4E-11  | 0        | 7.25E-09 | 8.4E-09  | 0        | (8.59E-21 to 4.62E-09)  |
| cg07123182 | 11 | 2722391 | 2.992  | 0.229 | 2.803  | -0.822  | -0.822  | 5.873   | 0.2075   | 0.2075   | 3.68E-07 | 20.75    | 20.75    | 3.68E-05 | (12.520 to 30.668)      |
| cg16556677 | 11 | 2722401 | 1.768  | 0.244 | 0.846  | -3.74   | -3.739  | 26.708  | 0        | 0        | 0        | 0        | 0        | 0        | (0.000 to 0.145)        |
| cg26963277 | 11 | 2722407 | 2.27   | 0.223 | 1.761  | -2.258  | -2.258  | 16.126  | 0.014    | 0.0145   | 0        | 1.4      | 1.45     | 0        | (0.251 to 4.020)        |
| cg11272547 | 11 | 2722440 | 2.5    | 0.164 | 2.277  | -1.344  | -1.344  | 9.601   | 0.0925   | 0.0925   | 7.63E-13 | 9.25     | 9.25     | 7.63E-11 | (4.095 to 16.639)       |
| cg03654058 | 11 | 2722539 | 2.232  | 0.274 | 1.853  | -1.369  | -1.368  | 9.775   | 0.0885   | 0.089    | 4.26E-13 | 8.85     | 8.9      | 4.26E-11 | (3.856 to 16.117)       |
| cg06809295 | 11 | 2722625 | 2.649  | 0.158 | 2.586  | -0.4    | -0.4    | 2.855   | 0.3455   | 0.3455   | 0.006    | 34.55    | 34.55    | 0.6      | (24.502 to 45.486)      |
| cg19678029 | 11 | 2722663 | 2.698  | 0.19  | 2.735  | 0.194   | 0.194   | -1.384  | 0.4235   | 0.4235   | 0.173    | 42.35    | 42.35    | 17.3     | (31.752 to 53.391)      |
| cg04762676 | 11 | 2722713 | 2.408  | 0.205 | 2.276  | -0.637  | -0.637  | 4.552   | 0.2635   | 0.2635   | 3.53E-05 | 26.35    | 26.35    | 0.00353  | (17.209 to 36.842)      |

|            |    |         |        |       |        |        |        |         |          |          |          |          |          |          |                        |
|------------|----|---------|--------|-------|--------|--------|--------|---------|----------|----------|----------|----------|----------|----------|------------------------|
| cg03512098 | 11 | 2730129 | 3.434  | 0.196 | 3.366  | -0.346 | -0.346 | 2.469   | 0.3655   | 0.3655   | 0.017    | 36.55    | 36.55    | 1.7      | (26.332 to 47.533)     |
| cg19764489 | 11 | 2730616 | 1.695  | 0.233 | 1.054  | -2.723 | -2.722 | 19.446  | 0.0045   | 0.0045   | 0        | 0.45     | 0.45     | 0        | (0.040 to 1.629)       |
| cg26438846 | 11 | 2731392 | 2.601  | 0.3   | 2.756  | 0.511  | 0.511  | -3.647  | 0.306    | 0.306    | 0.001    | 30.6     | 30.6     | 0.1      | (20.932 to 41.365)     |
| cg07592519 | 11 | 2735101 | 3.136  | 0.257 | 3.142  | 0.025  | 0.025  | -0.18   | 0.49     | 0.49     | 0.858    | 49       | 49       | 85.8     | (38.113 to 59.945)     |
| cg17227621 | 11 | 2741033 | 2.846  | 0.157 | 3.122  | 1.744  | 1.744  | -12.454 | 0.0435   | 0.044    | 0        | 4.35     | 4.4      | 0        | (1.383 to 9.462)       |
| cg15782852 | 11 | 2742507 | 2.626  | 0.182 | 2.288  | -1.846 | -1.846 | 13.185  | 0.0355   | 0.0355   | 0        | 3.55     | 3.55     | 0        | (1.012 to 8.073)       |
| cg16811455 | 11 | 2742553 | 1.708  | 0.158 | 2.112  | 2.534  | 2.533  | -18.096 | 0.0075   | 0.0075   | 0        | 0.75     | 0.75     | 0        | (0.087 to 2.388)       |
| cg17305275 | 11 | 2746675 | 2.563  | 0.281 | 2.877  | 1.111  | 1.11   | -7.931  | 0.136    | 0.136    | 2.44E-10 | 13.6     | 13.6     | 2.44E-08 | (7.041 to 22.267)      |
| cg24725201 | 11 | 2753818 | 2.931  | 0.174 | 3.161  | 1.305  | 1.305  | -9.322  | 0.099    | 0.099    | 1.97E-12 | 9.9      | 9.9      | 1.97E-10 | (4.506 to 17.506)      |
| cg15686157 | 11 | 2753885 | 1.798  | 0.178 | 1.672  | -0.701 | -0.701 | 5.009   | 0.243    | 0.2435   | 7.50E-06 | 24.3     | 24.35    | 0.00075  | (15.482 to 34.641)     |
| cg04907802 | 11 | 2753950 | 3.026  | 0.21  | 2.904  | -0.579 | -0.579 | 4.137   | 0.2825   | 0.2825   | 0        | 28.25    | 28.25    | 0        | (18.867 to 38.889)     |
| cg04894537 | 11 | 2763171 | -1.115 | 0.175 | -2.52  | -7.941 | -7.939 | 56.707  | 1.18E-10 | 1.36E-10 | 0        | 1.18E-08 | 1.36E-08 | 0        | (4.38E-20 to 9.64E-09) |
| cg01917852 | 11 | 2772759 | 2.107  | 0.251 | 2.646  | 2.126  | 2.125  | -15.18  | 0.0195   | 0.0195   | 0        | 1.95     | 1.95     | 0        | (0.403 to 5.083)       |
| cg16434897 | 11 | 2772799 | 1.988  | 0.212 | 2.423  | 2.032  | 2.032  | -14.513 | 0.024    | 0.024    | 0        | 2.4      | 2.4      | 0        | (0.555 to 5.963)       |
| cg13579167 | 11 | 2772852 | 3.049  | 0.195 | 3.439  | 1.974  | 1.974  | -14.098 | 0.027    | 0.027    | 0        | 2.7      | 2.7      | 0        | (0.673 to 6.568)       |
| cg11585942 | 11 | 2774756 | 2.385  | 0.149 | 2.403  | 0.119  | 0.119  | -0.85   | 0.453    | 0.453    | 0.399    | 45.3     | 45.3     | 39.9     | (34.537 to 56.299)     |
| cg25356736 | 11 | 2775022 | 0.452  | 0.227 | 0.203  | -1.087 | -1.086 | 7.759   | 0.1415   | 0.1415   | 4.47E-10 | 14.15    | 14.15    | 4.47E-08 | (7.415 to 22.906)      |
| cg19975301 | 11 | 2779993 | 2.729  | 0.177 | 2.817  | 0.492  | 0.492  | -3.515  | 0.3125   | 0.3125   | 0.001    | 31.25    | 31.25    | 0.1      | (21.507 to 42.041)     |
| cg05624382 | 11 | 2780050 | 2.85   | 0.173 | 2.804  | -0.263 | -0.263 | 1.878   | 0.397    | 0.397    | 0.066    | 39.7     | 39.7     | 6.6      | (29.243 to 50.713)     |
| cg11249934 | 11 | 2782519 | 1.322  | 0.188 | 0.808  | -2.711 | -2.71  | 19.36   | 0.0045   | 0.0045   | 0        | 0.45     | 0.45     | 0        | (0.042 to 1.670)       |
| cg06889525 | 11 | 2782615 | 2.5    | 0.147 | 2.713  | 1.435  | 1.435  | -10.251 | 0.079    | 0.079    | 8.79E-14 | 7.9      | 7.9      | 8.79E-12 | (3.256 to 14.742)      |
| cg13893637 | 11 | 2783554 | 2.015  | 0.185 | 2.224  | 1.12   | 1.119  | -7.996  | 0.134    | 0.1345   | 1.94E-10 | 13.4     | 13.45    | 1.94E-08 | (6.902 to 22.028)      |
| cg15467785 | 11 | 2783777 | 2.498  | 0.221 | 2.906  | 1.826  | 1.826  | -13.042 | 0.037    | 0.037    | 0        | 3.7      | 3.7      | 0        | (1.077 to 8.332)       |
| cg15910264 | 11 | 2783880 | 2.388  | 0.169 | 2.305  | -0.484 | -0.484 | 3.456   | 0.3155   | 0.3155   | 0.001    | 31.55    | 31.55    | 0.1      | (21.767 to 42.345)     |
| cg06850651 | 11 | 2785580 | 2.198  | 0.289 | 2.582  | 1.317  | 1.316  | -9.402  | 0.097    | 0.097    | 1.49E-12 | 9.7      | 9.7      | 1.49E-10 | (4.384 to 17.253)      |
| cg23750514 | 11 | 2790418 | 1.667  | 0.275 | 2.169  | 1.805  | 1.804  | -12.889 | 0.0385   | 0.0385   | 0        | 3.85     | 3.85     | 0        | (1.150 to 8.615)       |
| cg05438727 | 11 | 2800047 | -1.034 | 0.176 | -1.947 | -5.136 | -5.135 | 36.676  | 2.43E-06 | 2.55E-06 | 0        | 0.000243 | 0.000255 | 0        | (2.42E-08 to 0.002)    |
| cg12427469 | 11 | 2809574 | 2.667  | 0.147 | 2.688  | 0.148  | 0.148  | -1.057  | 0.4415   | 0.4415   | 0.296    | 44.15    | 44.15    | 29.6     | (33.453 to 55.174)     |
| cg06233503 | 11 | 2812674 | -1.582 | 0.194 | -1.411 | 0.872  | 0.872  | -6.227  | 0.1935   | 0.194    | 1.04E-07 | 19.35    | 19.4     | 1.04E-05 | (11.419 to 29.112)     |
| cg23903244 | 11 | 2812987 | -1.954 | 0.5   | -1.898 | 0.112  | 0.112  | -0.802  | 0.4555   | 0.4555   | 0.426    | 45.55    | 45.55    | 42.6     | (34.791 to 56.560)     |
| cg19728223 | 11 | 2813121 | -2.157 | 0.409 | -1.814 | 0.829  | 0.828  | -5.918  | 0.2055   | 0.206    | 3.13E-07 | 20.55    | 20.6     | 3.13E-05 | (12.376 to 30.468)     |

|            |    |         |        |       |        |        |        |         |          |          |          |         |          |          |                     |
|------------|----|---------|--------|-------|--------|--------|--------|---------|----------|----------|----------|---------|----------|----------|---------------------|
| cg17820828 | 11 | 2813298 | 0.222  | 0.393 | 0.53   | 0.776  | 0.776  | -5.543  | 0.2205   | 0.221    | 1.17E-06 | 22.05   | 22.1     | 0.000117 | (13.603 to 32.155)  |
| cg21752270 | 11 | 2813528 | 1.469  | 0.168 | 1.743  | 1.619  | 1.619  | -11.563 | 0.056    | 0.056    | 1.33E-15 | 5.6     | 5.6      | 1.33E-13 | (1.984 to 11.391)   |
| cg12901038 | 11 | 2815078 | 2.705  | 0.133 | 2.727  | 0.164  | 0.164  | -1.168  | 0.4355   | 0.4355   | 0.248    | 43.55   | 43.55    | 24.8     | (32.870 to 54.565)  |
| cg14384214 | 11 | 2817181 | 2.593  | 0.261 | 3.075  | 1.826  | 1.825  | -13.039 | 0.037    | 0.037    | 0        | 3.7     | 3.7      | 0        | (1.079 to 8.337)    |
| cg24478595 | 11 | 2817646 | 2.896  | 0.15  | 2.895  | -0.007 | -0.007 | 0.05    | 0.497    | 0.497    | 0.961    | 49.7    | 49.7     | 96.1     | (38.814 to 60.650)  |
| cg16778148 | 11 | 2817922 | 2.572  | 0.173 | 2.737  | 0.944  | 0.944  | -6.742  | 0.175    | 0.175    | 1.66E-08 | 17.5    | 17.5     | 1.66E-06 | (9.937 to 26.927)   |
| cg26879282 | 11 | 2817991 | 3.007  | 0.25  | 2.854  | -0.604 | -0.604 | 4.316   | 0.274    | 0.2745   | 7.69E-05 | 27.4    | 27.45    | 0.00769  | (18.141 to 37.999)  |
| cg01689159 | 11 | 2818128 | 2.22   | 0.118 | 2.462  | 2.024  | 2.023  | -14.451 | 0.024    | 0.0245   | 0        | 2.4     | 2.45     | 0        | (0.571 to 6.050)    |
| cg00325528 | 11 | 2819073 | 2.283  | 0.122 | 2.393  | 0.891  | 0.891  | -6.364  | 0.1885   | 0.1885   | 6.41E-08 | 18.85   | 18.85    | 6.41E-06 | (11.009 to 28.519)  |
| cg16419342 | 11 | 2821200 | 2.808  | 0.188 | 3.161  | 1.857  | 1.857  | -13.263 | 0.0345   | 0.0345   | 0        | 3.45    | 3.45     | 0        | (0.978 to 7.935)    |
| cg04008557 | 11 | 2826328 | 2.349  | 0.117 | 2.224  | -1.056 | -1.056 | 7.54    | 0.148    | 0.148    | 9.70E-10 | 14.8    | 14.8     | 9.70E-08 | (7.913 to 23.737)   |
| cg27050114 | 11 | 2826795 | 3.169  | 0.325 | 2.806  | -1.109 | -1.108 | 7.917   | 0.1365   | 0.1365   | 2.56E-10 | 13.65   | 13.65    | 2.56E-08 | (7.071 to 22.319)   |
| cg12851635 | 11 | 2826951 | 3.143  | 0.203 | 3.405  | 1.277  | 1.277  | -9.121  | 0.104    | 0.104    | 3.89E-12 | 10.4    | 10.4     | 3.89E-10 | (4.819 to 18.146)   |
| cg13253153 | 11 | 2826988 | 2.84   | 0.282 | 2.796  | -0.152 | -0.152 | 1.085   | 0.44     | 0.44     | 0.283    | 44      | 44       | 28.3     | (33.305 to 55.020)  |
| cg26671281 | 11 | 2828214 | 1.623  | 0.16  | 1.201  | -2.608 | -2.607 | 18.622  | 0.006    | 0.006    | 0        | 0.6     | 0.6      | 0        | (0.064 to 2.062)    |
| cg04759114 | 11 | 2828274 | 2.05   | 0.161 | 1.714  | -2.059 | -2.058 | 14.703  | 0.0225   | 0.0225   | 0        | 2.25    | 2.25     | 0        | (0.507 to 5.700)    |
| cg16609872 | 11 | 2828364 | 1.544  | 0.165 | 1.546  | 0.013  | 0.013  | -0.091  | 0.495    | 0.495    | 0.928    | 49.5    | 49.5     | 92.8     | (38.592 to 60.427)  |
| cg25173341 | 11 | 2828525 | 1.927  | 1.068 | -0.564 | -2.309 | -2.309 | 16.492  | 0.0125   | 0.0125   | 0        | 1.25    | 1.25     | 0        | (0.208 to 3.661)    |
| cg16324958 | 11 | 2828568 | 2.776  | 0.27  | 3.22   | 1.629  | 1.628  | -11.632 | 0.055    | 0.055    | 1.11E-15 | 5.5     | 5.5      | 1.11E-13 | (1.931 to 11.232)   |
| cg07979757 | 11 | 2828652 | 1.905  | 0.293 | 1.448  | -1.544 | -1.544 | 11.029  | 0.0645   | 0.0645   | 7.11E-15 | 6.45    | 6.45     | 7.11E-13 | (2.440 to 12.679)   |
| cg19923326 | 11 | 2828778 | 1.859  | 0.2   | 1.46   | -1.974 | -1.973 | 14.094  | 0.027    | 0.027    | 0        | 2.7     | 2.7      | 0        | (0.674 to 6.574)    |
| cg04635504 | 11 | 2829241 | 2.294  | 0.151 | 2.073  | -1.448 | -1.447 | 10.338  | 0.077    | 0.077    | 6.59E-14 | 7.7     | 7.7      | 6.59E-12 | (3.155 to 14.500)   |
| cg03571121 | 11 | 2832861 | 1.953  | 0.151 | 2.039  | 0.567  | 0.567  | -4.047  | 0.2865   | 0.287    | 0        | 28.65   | 28.7     | 0        | (19.236 to 39.337)  |
| cg03155200 | 11 | 2833259 | -0.046 | 0.334 | -1.513 | -4.353 | -4.352 | 31.084  | 3.41E-05 | 3.52E-05 | 0        | 0.00341 | 0.003515 | 0        | (5.67E-06 to 0.025) |
| cg03197835 | 11 | 2835996 | 2.087  | 0.259 | 2.583  | 1.901  | 1.901  | -13.578 | 0.0315   | 0.0315   | 0        | 3.15    | 3.15     | 0        | (0.851 to 7.396)    |
| cg26958174 | 11 | 2840699 | 2.611  | 0.161 | 2.678  | 0.418  | 0.417  | -2.982  | 0.339    | 0.339    | 0.004    | 33.9    | 33.9     | 0.4      | (23.910 to 44.815)  |
| cg19852660 | 11 | 2846681 | 0.888  | 0.161 | 0.768  | -0.736 | -0.736 | 5.257   | 0.2325   | 0.2325   | 3.18E-06 | 23.25   | 23.25    | 0.000318 | (14.591 to 33.475)  |
| cg13859639 | 11 | 2846716 | -0.39  | 0.143 | -0.649 | -1.802 | -1.802 | 12.869  | 0.039    | 0.039    | 0        | 3.9     | 3.9      | 0        | (1.160 to 8.653)    |
| cg17416793 | 11 | 2846932 | -0.261 | 0.205 | -0.365 | -0.502 | -0.502 | 3.587   | 0.309    | 0.309    | 0.001    | 30.9    | 30.9     | 0.1      | (21.192 to 41.671)  |
| cg17333973 | 11 | 2847019 | -0.529 | 0.137 | -0.7   | -1.247 | -1.247 | 8.905   | 0.109    | 0.1095   | 8.18E-12 | 10.9    | 10.95    | 8.18E-10 | (5.175 to 18.853)   |
| cg06485603 | 11 | 2847258 | -2.336 | 0.282 | -3.662 | -4.652 | -4.651 | 33.225  | 1.26E-05 | 1.31E-05 | 0        | 0.00126 | 0.001305 | 0        | (8.24E-07 to 0.010) |

|            |    |         |        |       |        |        |        |        |          |          |          |          |          |          |                        |
|------------|----|---------|--------|-------|--------|--------|--------|--------|----------|----------|----------|----------|----------|----------|------------------------|
| cg12141659 | 11 | 2847462 | -1.508 | 0.208 | -3.003 | -7.097 | -7.095 | 50.681 | 2.35E-09 | 2.63E-09 | 0        | 2.35E-07 | 2.63E-07 | 0        | (4.89E-16 to 6.55E-07) |
| cg10151367 | 11 | 2847642 | -2.063 | 0.22  | -3.079 | -4.57  | -4.569 | 32.637 | 1.66E-05 | 1.72E-05 | 0        | 0.00166  | 0.00172  | 0        | (1.45E-06 to 0.013)    |
| cg21130221 | 11 | 2848310 | -0.405 | 0.24  | -0.802 | -1.636 | -1.635 | 11.681 | 0.054    | 0.0545   | 8.88E-16 | 5.4      | 5.45     | 8.88E-14 | (1.893 to 11.119)      |
| cg18272633 | 11 | 2848492 | 0.981  | 0.194 | 0.88   | -0.519 | -0.519 | 3.704  | 0.303    | 0.303    | 0.001    | 30.3     | 30.3     | 0.1      | (20.688 to 41.076)     |

**Supplementary Table 9. Performance of CH-test in detecting hypomethylation at the cardinal loci in an MLMD sample.** The table presents 450k DNA methylation data across *KCNQ1* region in BWS-MLMD4 sample. The point estimate represents the estimated percentage of the control population that would be expected to obtain lower score than the case and 95% confidence interval of point estimates were calculated from the noncentrality parameter from a noncentral t-distribution along with the point and interval estimates of the effect size. Here, ILMNID = Illumina Infinium HumanMethylation450 array probe ID, Chr = chromosome, Map information = genomic location (hg19), Mean = Control mean, and SD = control standard deviation, adjusted-p = Adjusted p-value using false discovery rate method,  $z_{cc}$  = point estimate of the effect size.

| ILMNID     | Chr | Map Information | Control group |       | Case score | Significance test |         | Estimated percentage of the control population obtaining a lower score than the case |                    | Adjusted p | $z_{cc}$ | Estimated effect size (95%CI) |
|------------|-----|-----------------|---------------|-------|------------|-------------------|---------|--------------------------------------------------------------------------------------|--------------------|------------|----------|-------------------------------|
|            |     |                 | Mean          | SD    |            | t-value           | p-value | Point                                                                                | (95%CI)            |            |          |                               |
| cg00000924 | 11  | 2720463         | 0.104         | 0.108 | -0.93      | -9.52             | 0       | 0                                                                                    | (0.000 to 0.000)   | 0          | -9.615   | (-11.490 to -7.642)           |
| cg00243281 | 11  | 2597838         | 1.784         | 0.169 | 1.429      | -2.08             | 0.021   | 2.1                                                                                  | (0.472 to 5.499)   | 0.239      | -2.101   | (-2.596 to -1.598)            |
| cg00283576 | 11  | 2465351         | -2.991        | 0.158 | -2.769     | 1.388             | 0.086   | 8.6                                                                                  | (3.676 to 15.716)  | 0.377      | 1.402    | (1.006 to 1.790)              |
| cg00325528 | 11  | 2819073         | 2.286         | 0.122 | 2.231      | -0.446            | 0.329   | 32.9                                                                                 | (22.982 to 43.753) | 0.483      | -0.45    | (-0.739 to -0.157)            |
| cg00382572 | 11  | 2574042         | 2.583         | 0.277 | 2.879      | 1.059             | 0.147   | 14.7                                                                                 | (7.867 to 23.662)  | 0.428      | 1.069    | (0.717 to 1.414)              |
| cg01178971 | 11  | 2464851         | 1.297         | 0.278 | 1.042      | -0.907            | 0.184   | 18.4                                                                                 | (10.676 to 28.031) | 0.446      | -0.916   | (-1.244 to -0.582)            |
| cg01298120 | 11  | 2499341         | 3.17          | 0.182 | 3.305      | 0.739             | 0.232   | 23.2                                                                                 | (14.526 to 33.389) | 0.462      | 0.746    | (0.429 to 1.057)              |
| cg01616349 | 11  | 2596468         | 2.374         | 0.164 | 2.308      | -0.402            | 0.345   | 34.5                                                                                 | (24.434 to 45.409) | 0.485      | -0.406   | (-0.692 to -0.115)            |
| cg01689159 | 11  | 2818128         | 2.223         | 0.118 | 2.337      | 0.956             | 0.172   | 17.2                                                                                 | (9.714 to 26.589)  | 0.44       | 0.965    | (0.625 to 1.298)              |
| cg01693193 | 11  | 2705153         | 2.055         | 0.181 | 2.29       | 1.285             | 0.102   | 10.2                                                                                 | (4.725 to 17.956)  | 0.394      | 1.298    | (0.917 to 1.672)              |

|            |    |         |        |       |        |         |       |      |                    |       |         |                     |
|------------|----|---------|--------|-------|--------|---------|-------|------|--------------------|-------|---------|---------------------|
| cg01734338 | 11 | 2491231 | 1.892  | 0.247 | 1.935  | 0.173   | 0.432 | 43.2 | (32.535 to 54.215) | 0.495 | 0.174   | (-0.106 to 0.453)   |
| cg01873334 | 11 | 2721632 | 0.562  | 0.141 | -0.294 | -6.01   | 0     | 0    | (0.000 to 0.000)   | 0     | -6.069  | (-7.272 to -4.837)  |
| cg01893176 | 11 | 2721952 | -0.375 | 0.086 | -1.249 | -10.08  | 0     | 0    | (0.000 to 0.000)   | 0     | -10.18  | (-12.162 to -8.093) |
| cg01917852 | 11 | 2772759 | 2.11   | 0.251 | 2.127  | 0.068   | 0.473 | 47.3 | (36.482 to 58.294) | 0.498 | 0.068   | (-0.209 to 0.346)   |
| cg02021157 | 11 | 2644078 | 2.212  | 0.176 | 2.281  | 0.389   | 0.349 | 34.9 | (24.860 to 45.889) | 0.486 | 0.393   | (0.103 to 0.679)    |
| cg02097203 | 11 | 2548282 | -2.99  | 0.23  | -3.03  | -0.171  | 0.432 | 43.2 | (32.582 to 54.263) | 0.495 | -0.173  | (-0.451 to 0.107)   |
| cg02180189 | 11 | 2710486 | 1.308  | 0.209 | 0.861  | -2.114  | 0.02  | 2    | (0.419 to 5.185)   | 0.232 | -2.135  | (-2.636 to -1.627)  |
| cg02219360 | 11 | 2721409 | 0.003  | 0.142 | -1.073 | -7.507  | 0     | 0    | (0.000 to 0.000)   | 0     | -7.581  | (-9.069 to -6.016)  |
| cg02258534 | 11 | 2555497 | 0.441  | 0.184 | 0.856  | 2.229   | 0.015 | 1.5  | (0.280 to 4.239)   | 0.209 | 2.251   | (1.724 to 2.771)    |
| cg02335306 | 11 | 2559880 | 2.907  | 0.183 | 2.982  | 0.407   | 0.343 | 34.3 | (24.270 to 45.223) | 0.485 | 0.411   | (0.120 to 0.698)    |
| cg02798157 | 11 | 2722195 | -0.09  | 0.112 | -0.959 | -7.672  | 0     | 0    | (0.000 to 0.000)   | 0     | -7.748  | (-9.267 to -6.150)  |
| cg03030994 | 11 | 2562310 | 2.35   | 0.176 | 2.602  | 1.421   | 0.081 | 8.1  | (3.378 to 15.029)  | 0.371 | 1.435   | (1.035 to 1.828)    |
| cg03118430 | 11 | 2482233 | 3.116  | 0.235 | 3.126  | 0.041   | 0.484 | 48.4 | (37.500 to 59.327) | 0.499 | 0.042   | (-0.236 to 0.319)   |
| cg03155200 | 11 | 2833259 | -0.039 | 0.332 | 0.47   | 1.516   | 0.068 | 6.8  | (2.632 to 13.189)  | 0.353 | 1.531   | (1.118 to 1.938)    |
| cg03170016 | 11 | 2482142 | 1.385  | 0.134 | 1.034  | -2.588  | 0.006 | 0.6  | (0.070 to 2.145)   | 0.142 | -2.614  | (-3.196 to -2.025)  |
| cg03197835 | 11 | 2835996 | 2.09   | 0.259 | 2.358  | 1.026   | 0.155 | 15.5 | (8.417 to 24.558)  | 0.432 | 1.036   | (0.688 to 1.378)    |
| cg03365111 | 11 | 2481857 | 2.891  | 0.195 | 2.754  | -0.694  | 0.245 | 24.5 | (15.671 to 34.885) | 0.466 | -0.701  | (-1.008 to -0.388)  |
| cg03371125 | 11 | 2464845 | 2.297  | 0.151 | 2.374  | 0.504   | 0.308 | 30.8 | (21.137 to 41.606) | 0.479 | 0.509   | (0.212 to 0.802)    |
| cg03401726 | 11 | 2721248 | 0.214  | 0.118 | -0.578 | -6.645  | 0     | 0    | (0.000 to 0.000)   | 0     | -6.711  | (-8.034 to -5.321)  |
| cg03411938 | 11 | 2700003 | 0.426  | 0.163 | 0.62   | 1.181   | 0.122 | 12.2 | (6.028 to 20.467)  | 0.411 | 1.192   | (0.825 to 1.552)    |
| cg03422070 | 11 | 2722082 | 0.195  | 0.115 | -1.1   | -11.128 | 0     | 0    | (0.000 to 0.000)   | 0     | -11.239 | (-13.424 to -8.939) |
| cg03512098 | 11 | 2730129 | 3.436  | 0.196 | 3.262  | -0.882  | 0.191 | 19.1 | (11.207 to 28.806) | 0.448 | -0.891  | (-1.216 to -0.559)  |
| cg03571121 | 11 | 2832861 | 1.956  | 0.151 | 2.082  | 0.826   | 0.206 | 20.6 | (12.428 to 30.541) | 0.454 | 0.835   | (0.509 to 1.154)    |
| cg03600094 | 11 | 2481475 | 1.998  | 0.222 | 2.234  | 1.052   | 0.149 | 14.9 | (7.974 to 23.837)  | 0.429 | 1.063   | (0.712 to 1.407)    |
| cg03654058 | 11 | 2722539 | 2.236  | 0.274 | 2.108  | -0.46   | 0.324 | 32.4 | (22.542 to 43.246) | 0.482 | -0.464  | (-0.754 to -0.170)  |
| cg03660952 | 11 | 2644418 | 0.338  | 0.189 | 0.293  | -0.234  | 0.408 | 40.8 | (30.296 to 51.844) | 0.492 | -0.236  | (-0.516 to 0.046)   |
| cg03820779 | 11 | 2573972 | 2.834  | 0.217 | 2.757  | -0.348  | 0.365 | 36.5 | (26.264 to 47.458) | 0.488 | -0.351  | (-0.635 to -0.064)  |
| cg03905757 | 11 | 2566193 | 1.994  | 0.298 | 1.747  | -0.819  | 0.208 | 20.8 | (12.602 to 30.782) | 0.455 | -0.827  | (-1.145 to -0.502)  |
| cg04008557 | 11 | 2826328 | 2.352  | 0.117 | 2.367  | 0.129   | 0.449 | 44.9 | (34.157 to 55.905) | 0.496 | 0.13    | (-0.149 to 0.408)   |
| cg04055211 | 11 | 2459151 | 2.363  | 0.22  | 2.526  | 0.738   | 0.232 | 23.2 | (14.555 to 33.428) | 0.462 | 0.745   | (0.428 to 1.056)    |
| cg04104132 | 11 | 2465440 | -1.672 | 0.162 | -1.769 | -0.592  | 0.278 | 27.8 | (18.505 to 38.447) | 0.474 | -0.598  | (-0.896 to -0.294)  |



|            |    |         |        |       |        |         |       |      |                    |       |         |                     |
|------------|----|---------|--------|-------|--------|---------|-------|------|--------------------|-------|---------|---------------------|
| cg04204548 | 11 | 2465887 | -3.118 | 0.218 | -3.869 | -3.414  | 0.001 | 0.1  | (0.001 to 0.336)   | 0.044 | -3.448  | (-4.180 to -2.710)  |
| cg04211344 | 11 | 2603221 | 2.818  | 0.167 | 2.815  | -0.013  | 0.495 | 49.5 | (38.570 to 60.405) | 0.5   | -0.013  | (-0.291 to 0.264)   |
| cg04608933 | 11 | 2554801 | 0.922  | 0.158 | 0.907  | -0.092  | 0.464 | 46.4 | (35.574 to 57.365) | 0.497 | -0.093  | (-0.370 to 0.186)   |
| cg04635504 | 11 | 2829241 | 2.297  | 0.151 | 2.468  | 1.122   | 0.134 | 13.4 | (6.869 to 21.969)  | 0.42  | 1.133   | (0.773 to 1.486)    |
| cg04666029 | 11 | 2552843 | -2.426 | 0.117 | -1.883 | 4.582   | 0     | 0    | (0.000 to 0.012)   | 0.004 | 4.628   | (3.671 to 5.562)    |
| cg04719766 | 11 | 2542580 | 2.983  | 0.206 | 3.086  | 0.493   | 0.312 | 31.2 | (21.477 to 42.006) | 0.48  | 0.498   | (0.202 to 0.790)    |
| cg04759114 | 11 | 2828274 | 2.053  | 0.161 | 2.001  | -0.318  | 0.376 | 37.6 | (27.300 to 48.600) | 0.489 | -0.321  | (-0.604 to -0.035)  |
| cg04762676 | 11 | 2722713 | 2.411  | 0.204 | 2.09   | -1.556  | 0.063 | 6.3  | (2.367 to 12.479)  | 0.346 | -1.571  | (-1.983 to -1.151)  |
| cg04894537 | 11 | 2763171 | -1.106 | 0.175 | -0.272 | 4.705   | 0     | 0    | (0.000 to 0.008)   | 0.003 | 4.752   | (3.771 to 5.709)    |
| cg04902871 | 11 | 2464954 | 1.482  | 0.271 | 1.279  | -0.743  | 0.231 | 23.1 | (14.419 to 33.248) | 0.462 | -0.75   | (-1.062 to -0.433)  |
| cg04907802 | 11 | 2753950 | 3.029  | 0.209 | 3.115  | 0.406   | 0.343 | 34.3 | (24.287 to 45.242) | 0.485 | 0.41    | (0.120 to 0.697)    |
| cg05125641 | 11 | 2503306 | 2.212  | 0.198 | 1.993  | -1.095  | 0.139 | 13.9 | (7.274 to 22.667)  | 0.423 | -1.106  | (-1.456 to -0.750)  |
| cg05302416 | 11 | 2466037 | -2.424 | 0.255 | -2.675 | -0.973  | 0.168 | 16.8 | (9.384 to 26.082)  | 0.438 | -0.983  | (-1.317 to -0.641)  |
| cg05418487 | 11 | 2466889 | -3.5   | 0.164 | -3.454 | 0.279   | 0.391 | 39.1 | (28.668 to 50.093) | 0.491 | 0.282   | (-0.002 to 0.563)   |
| cg05438727 | 11 | 2800047 | -1.024 | 0.176 | -1.11  | -0.478  | 0.317 | 31.7 | (21.950 to 42.558) | 0.481 | -0.483  | (-0.774 to -0.188)  |
| cg05624382 | 11 | 2780050 | 2.853  | 0.173 | 2.799  | -0.311  | 0.378 | 37.8 | (27.523 to 48.845) | 0.489 | -0.315  | (-0.597 to -0.029)  |
| cg05740879 | 11 | 2721866 | 0.179  | 0.104 | -0.859 | -9.878  | 0     | 0    | (0.000 to 0.000)   | 0     | -9.977  | (-11.920 to -7.931) |
| cg05753930 | 11 | 2678450 | 2.642  | 0.248 | 2.105  | -2.149  | 0.018 | 1.8  | (0.372 to 4.884)   | 0.225 | -2.17   | (-2.677 to -1.656)  |
| cg05760393 | 11 | 2466141 | -4.031 | 0.394 | -4.235 | -0.513  | 0.305 | 30.5 | (20.871 to 41.293) | 0.479 | -0.518  | (-0.811 to -0.220)  |
| cg05816130 | 11 | 2721799 | 0.13   | 0.1   | -0.803 | -9.27   | 0     | 0    | (0.000 to 0.000)   | 0     | -9.362  | (-11.189 to -7.440) |
| cg05898618 | 11 | 2555576 | 1.989  | 0.391 | 2.823  | 2.111   | 0.02  | 2    | (0.423 to 5.210)   | 0.232 | 2.132   | (1.625 to 2.633)    |
| cg06047778 | 11 | 2596300 | 2.623  | 0.129 | 2.585  | -0.287  | 0.388 | 38.8 | (28.370 to 49.769) | 0.49  | -0.29   | (-0.572 to -0.006)  |
| cg06159548 | 11 | 2481370 | 2.067  | 0.151 | 2.05   | -0.114  | 0.455 | 45.5 | (34.725 to 56.493) | 0.497 | -0.115  | (-0.393 to 0.163)   |
| cg06233503 | 11 | 2812674 | -1.574 | 0.195 | -1.238 | 1.713   | 0.047 | 4.7  | (1.515 to 9.913)   | 0.314 | 1.73    | (1.287 to 2.166)    |
| cg06264108 | 11 | 2603429 | 3.279  | 0.183 | 3.292  | 0.068   | 0.473 | 47.3 | (36.456 to 58.267) | 0.498 | 0.069   | (-0.209 to 0.346)   |
| cg06288089 | 11 | 2722119 | -0.1   | 0.089 | -1.162 | -11.834 | 0     | 0    | (0.000 to 0.000)   | 0     | -11.951 | (-14.273 to -9.508) |
| cg06294475 | 11 | 2698623 | -0.903 | 0.336 | -0.338 | 1.665   | 0.051 | 5.1  | (1.740 to 10.646)  | 0.324 | 1.682   | (1.246 to 2.111)    |
| cg06485603 | 11 | 2847258 | -2.332 | 0.283 | -1.837 | 1.729   | 0.045 | 4.5  | (1.445 to 9.678)   | 0.311 | 1.746   | (1.300 to 2.185)    |
| cg06533200 | 11 | 2466138 | -4.251 | 0.344 | -4.497 | -0.709  | 0.241 | 24.1 | (15.297 to 34.402) | 0.465 | -0.716  | (-1.024 to -0.402)  |
| cg06585606 | 11 | 2680854 | 3.111  | 0.245 | 3.15   | 0.156   | 0.439 | 43.9 | (33.171 to 54.880) | 0.495 | 0.157   | (-0.123 to 0.435)   |
| cg06809295 | 11 | 2722625 | 2.653  | 0.158 | 2.299  | -2.222  | 0.015 | 1.5  | (0.286 to 4.286)   | 0.211 | -2.245  | (-2.764 to -1.718)  |

|            |    |         |        |       |        |        |       |      |                    |       |        |                    |
|------------|----|---------|--------|-------|--------|--------|-------|------|--------------------|-------|--------|--------------------|
| cg06827779 | 11 | 2603011 | 2.536  | 0.185 | 2.527  | -0.048 | 0.481 | 48.1 | (37.229 to 59.053) | 0.499 | -0.049 | (-0.326 to 0.229)  |
| cg06838584 | 11 | 2504581 | 2.929  | 0.309 | 2.871  | -0.185 | 0.427 | 42.7 | (32.086 to 53.743) | 0.494 | -0.187 | (-0.465 to 0.094)  |
| cg06850651 | 11 | 2785580 | 2.201  | 0.289 | 2.658  | 1.565  | 0.062 | 6.2  | (2.308 to 12.316)  | 0.344 | 1.58   | (1.159 to 1.994)   |
| cg06873192 | 11 | 2598347 | 2.21   | 0.147 | 2.036  | -1.175 | 0.123 | 12.3 | (6.108 to 20.612)  | 0.412 | -1.187 | (-1.546 to -0.820) |
| cg06889525 | 11 | 2782615 | 2.503  | 0.147 | 2.651  | 0.996  | 0.162 | 16.2 | (8.953 to 25.411)  | 0.435 | 1.006  | (0.662 to 1.344)   |
| cg06914593 | 11 | 2684842 | 2.674  | 0.137 | 2.686  | 0.087  | 0.466 | 46.6 | (35.753 to 57.549) | 0.498 | 0.088  | (-0.190 to 0.365)  |
| cg06960356 | 11 | 2596416 | 3.132  | 0.247 | 3.201  | 0.278  | 0.391 | 39.1 | (28.704 to 50.131) | 0.491 | 0.281  | (-0.003 to 0.562)  |
| cg07003739 | 11 | 2640527 | 1.612  | 0.158 | 1.581  | -0.191 | 0.425 | 42.5 | (31.872 to 53.516) | 0.494 | -0.192 | (-0.471 to 0.088)  |
| cg07040680 | 11 | 2621365 | 1.85   | 0.189 | 2.059  | 1.093  | 0.14  | 14   | (7.312 to 22.731)  | 0.424 | 1.104  | (0.748 to 1.453)   |
| cg07072281 | 11 | 2713432 | 2.302  | 0.145 | 2.363  | 0.416  | 0.34  | 34   | (23.972 to 44.885) | 0.484 | 0.42   | (0.129 to 0.707)   |
| cg07123182 | 11 | 2722391 | 2.995  | 0.228 | 2.686  | -1.341 | 0.093 | 9.3  | (4.127 to 16.709)  | 0.385 | -1.355 | (-1.736 to -0.966) |
| cg07127259 | 11 | 2466042 | -3.106 | 0.254 | -3.109 | -0.011 | 0.496 | 49.6 | (38.648 to 60.484) | 0.5   | -0.011 | (-0.288 to 0.266)  |
| cg07210454 | 11 | 2482303 | 2.257  | 0.288 | 2.527  | 0.927  | 0.179 | 17.9 | (10.284 to 27.449) | 0.443 | 0.936  | (0.599 to 1.266)   |
| cg07549149 | 11 | 2560783 | 2.447  | 0.267 | 2.413  | -0.125 | 0.45  | 45   | (34.303 to 56.056) | 0.496 | -0.127 | (-0.404 to 0.152)  |
| cg07556018 | 11 | 2677341 | -0.595 | 0.236 | 0.392  | 4.132  | 0     | 0    | (0.000 to 0.048)   | 0.012 | 4.174  | (3.302 to 5.040)   |
| cg07592519 | 11 | 2735101 | 3.139  | 0.257 | 2.989  | -0.577 | 0.283 | 28.3 | (18.924 to 38.958) | 0.475 | -0.583 | (-0.881 to -0.280) |
| cg07595203 | 11 | 2721480 | -0.466 | 0.124 | -1.374 | -7.263 | 0     | 0    | (0.000 to 0.000)   | 0     | -7.335 | (-8.776 to -5.819) |
| cg07618453 | 11 | 2502181 | -2.178 | 0.246 | -2.119 | 0.24   | 0.406 | 40.6 | (30.061 to 51.593) | 0.492 | 0.243  | (-0.040 to 0.523)  |
| cg07640406 | 11 | 2558029 | 2.389  | 0.172 | 2.357  | -0.19  | 0.425 | 42.5 | (31.908 to 53.554) | 0.494 | -0.191 | (-0.470 to 0.089)  |
| cg07683142 | 11 | 2704514 | 2.354  | 0.193 | 2.024  | -1.694 | 0.048 | 4.8  | (1.600 to 10.196)  | 0.318 | -1.711 | (-2.144 to -1.270) |
| cg07824422 | 11 | 2555406 | -0.561 | 0.153 | -0.268 | 1.891  | 0.032 | 3.2  | (0.878 to 7.513)   | 0.278 | 1.91   | (1.439 to 2.375)   |
| cg07979757 | 11 | 2828652 | 1.908  | 0.293 | 2.129  | 0.746  | 0.23  | 23   | (14.336 to 33.137) | 0.462 | 0.754  | (0.436 to 1.065)   |
| cg08007665 | 11 | 2593857 | 2.139  | 0.194 | 2.213  | 0.379  | 0.353 | 35.3 | (25.196 to 46.267) | 0.486 | 0.383  | (0.094 to 0.668)   |
| cg08160246 | 11 | 2709914 | 1.374  | 0.12  | 1.29   | -0.691 | 0.246 | 24.6 | (15.758 to 34.998) | 0.466 | -0.698 | (-1.004 to -0.385) |
| cg08249467 | 11 | 2646113 | 2.713  | 0.257 | 2.778  | 0.252  | 0.401 | 40.1 | (29.641 to 51.142) | 0.492 | 0.254  | (-0.029 to 0.535)  |
| cg08359167 | 11 | 2721351 | 0.076  | 0.122 | -0.664 | -6.017 | 0     | 0    | (0.000 to 0.000)   | 0     | -6.077 | (-7.281 to -4.844) |
| cg08419850 | 11 | 2569801 | 3.414  | 0.176 | 3.249  | -0.93  | 0.179 | 17.9 | (10.222 to 27.357) | 0.443 | -0.939 | (-1.269 to -0.602) |
| cg08446215 | 11 | 2721366 | 0.169  | 0.142 | -0.999 | -8.119 | 0     | 0    | (0.000 to 0.000)   | 0     | -8.2   | (-9.805 to -6.511) |
| cg08861541 | 11 | 2610149 | 3.123  | 0.196 | 3.118  | -0.023 | 0.491 | 49.1 | (38.197 to 60.031) | 0.499 | -0.023 | (-0.300 to 0.254)  |
| cg08895013 | 11 | 2468332 | -2.792 | 0.155 | -2.845 | -0.34  | 0.368 | 36.8 | (26.527 to 47.749) | 0.488 | -0.343 | (-0.627 to -0.056) |
| cg09197492 | 11 | 2571399 | 2.776  | 0.231 | 2.386  | -1.672 | 0.05  | 5    | (1.708 to 10.545)  | 0.322 | -1.688 | (-2.118 to -1.251) |

|            |    |         |        |       |        |        |       |      |                    |       |        |                    |
|------------|----|---------|--------|-------|--------|--------|-------|------|--------------------|-------|--------|--------------------|
| cg09254350 | 11 | 2574026 | 3.139  | 0.251 | 2.977  | -0.641 | 0.262 | 26.2 | (17.105 to 36.710) | 0.47  | -0.648 | (-0.950 to -0.340) |
| cg09315662 | 11 | 2612781 | 2.28   | 0.141 | 2.031  | -1.757 | 0.043 | 4.3  | (1.330 to 9.276)   | 0.305 | -1.774 | (-2.217 to -1.324) |
| cg09336947 | 11 | 2465950 | -3.314 | 0.538 | -3.469 | -0.285 | 0.388 | 38.8 | (28.441 to 49.846) | 0.49  | -0.288 | (-0.570 to -0.004) |
| cg09390414 | 11 | 2571525 | 3.14   | 0.246 | 2.994  | -0.587 | 0.28  | 28   | (18.648 to 38.622) | 0.474 | -0.593 | (-0.891 to -0.289) |
| cg09393494 | 11 | 2482401 | 2.35   | 0.167 | 2.34   | -0.058 | 0.477 | 47.7 | (36.836 to 58.654) | 0.498 | -0.059 | (-0.336 to 0.219)  |
| cg09518720 | 11 | 2721591 | 0.397  | 0.215 | -0.597 | -4.571 | 0     | 0    | (0.000 to 0.013)   | 0.005 | -4.617 | (-5.548 to -3.662) |
| cg09916212 | 11 | 2498390 | 3.186  | 0.282 | 2.883  | -1.065 | 0.146 | 14.6 | (7.762 to 23.487)  | 0.427 | -1.076 | (-1.421 to -0.723) |
| cg10151367 | 11 | 2847642 | -2.058 | 0.221 | -2.301 | -1.089 | 0.141 | 14.1 | (7.369 to 22.828)  | 0.424 | -1.1   | (-1.449 to -0.745) |
| cg10425885 | 11 | 2458734 | 2.357  | 0.142 | 2.328  | -0.201 | 0.421 | 42.1 | (31.476 to 53.098) | 0.494 | -0.203 | (-0.482 to 0.078)  |
| cg10673351 | 11 | 2471097 | 2.515  | 0.183 | 2.651  | 0.734  | 0.233 | 23.3 | (14.652 to 33.556) | 0.463 | 0.741  | (0.425 to 1.051)   |
| cg10678459 | 11 | 2465103 | 1.961  | 0.243 | 1.581  | -1.553 | 0.063 | 6.3  | (2.383 to 12.523)  | 0.346 | -1.569 | (-1.980 to -1.149) |
| cg11025829 | 11 | 2465136 | -1.14  | 0.16  | -1.174 | -0.212 | 0.416 | 41.6 | (31.072 to 52.670) | 0.493 | -0.214 | (-0.494 to 0.067)  |
| cg11249934 | 11 | 2782519 | 1.325  | 0.188 | 1.032  | -1.544 | 0.065 | 6.5  | (2.445 to 12.693)  | 0.348 | -1.559 | (-1.969 to -1.141) |
| cg11272547 | 11 | 2722440 | 2.503  | 0.164 | 2.135  | -2.224 | 0.015 | 1.5  | (0.284 to 4.276)   | 0.21  | -2.246 | (-2.765 to -1.720) |
| cg11297256 | 11 | 2720810 | 0.473  | 0.157 | -0.65  | -7.099 | 0     | 0    | (0.000 to 0.000)   | 0     | -7.169 | (-8.579 to -5.687) |
| cg11342234 | 11 | 2710838 | 0.694  | 0.185 | 0.375  | -1.703 | 0.047 | 4.7  | (1.560 to 10.065)  | 0.316 | -1.72  | (-2.155 to -1.278) |
| cg11363972 | 11 | 2465249 | 0.358  | 0.176 | 0.105  | -1.428 | 0.08  | 8    | (3.322 to 14.899)  | 0.37  | -1.442 | (-1.835 to -1.041) |
| cg11585942 | 11 | 2774756 | 2.388  | 0.149 | 2.61   | 1.468  | 0.074 | 7.4  | (2.988 to 14.094)  | 0.362 | 1.483  | (1.076 to 1.882)   |
| cg11652182 | 11 | 2542384 | 2.984  | 0.213 | 3.125  | 0.655  | 0.258 | 25.8 | (16.720 to 36.226) | 0.469 | 0.662  | (0.352 to 0.965)   |
| cg11875582 | 11 | 2718307 | 2.287  | 0.325 | 2.494  | 0.628  | 0.266 | 26.6 | (17.474 to 37.173) | 0.471 | 0.634  | (0.327 to 0.936)   |
| cg11878045 | 11 | 2482536 | 1.897  | 0.153 | 1.757  | -0.904 | 0.185 | 18.5 | (10.743 to 28.130) | 0.446 | -0.913 | (-1.240 to -0.579) |
| cg11993252 | 11 | 2721961 | 0.265  | 0.118 | -0.55  | -6.819 | 0     | 0    | (0.000 to 0.000)   | 0     | -6.887 | (-8.244 to -5.461) |
| cg12077660 | 11 | 2721243 | 0.103  | 0.114 | -0.651 | -6.536 | 0     | 0    | (0.000 to 0.000)   | 0     | -6.601 | (-7.903 to -5.266) |
| cg12141659 | 11 | 2847462 | -1.5   | 0.209 | -1.456 | 0.21   | 0.417 | 41.7 | (31.168 to 52.772) | 0.493 | 0.212  | (-0.070 to 0.491)  |
| cg12223985 | 11 | 2595800 | 2.974  | 0.211 | 3.111  | 0.645  | 0.261 | 26.1 | (17.001 to 36.581) | 0.47  | 0.651  | (0.343 to 0.954)   |
| cg12263990 | 11 | 2606365 | 2.736  | 0.158 | 2.442  | -1.843 | 0.036 | 3.6  | (1.023 to 8.115)   | 0.288 | -1.861 | (-2.318 to -1.397) |
| cg12424548 | 11 | 2591932 | 1.922  | 0.242 | 1.703  | -0.896 | 0.187 | 18.7 | (10.919 to 28.387) | 0.447 | -0.904 | (-1.231 to -0.571) |
| cg12427469 | 11 | 2809574 | 2.67   | 0.147 | 2.647  | -0.153 | 0.439 | 43.9 | (33.261 to 54.974) | 0.495 | -0.155 | (-0.433 to 0.125)  |
| cg12433386 | 11 | 2722340 | 1.17   | 0.217 | 0.629  | -2.475 | 0.008 | 0.8  | (0.110 to 2.681)   | 0.162 | -2.499 | (-3.062 to -1.930) |
| cg12520982 | 11 | 2548920 | 1.88   | 0.144 | 2.136  | 1.764  | 0.042 | 4.2  | (1.303 to 9.178)   | 0.304 | 1.781  | (1.330 to 2.225)   |
| cg12578166 | 11 | 2466909 | -1.928 | 0.127 | -1.989 | -0.476 | 0.318 | 31.8 | (22.019 to 42.639) | 0.481 | -0.481 | (-0.772 to -0.186) |

|            |    |         |        |       |        |         |       |      |                    |       |         |                     |
|------------|----|---------|--------|-------|--------|---------|-------|------|--------------------|-------|---------|---------------------|
| cg12851635 | 11 | 2826951 | 3.146  | 0.203 | 3.237  | 0.445   | 0.329 | 32.9 | (23.004 to 43.778) | 0.483 | 0.45    | (0.157 to 0.739)    |
| cg12901038 | 11 | 2815078 | 2.708  | 0.133 | 2.623  | -0.634  | 0.264 | 26.4 | (17.290 to 36.942) | 0.471 | -0.641  | (-0.943 to -0.333)  |
| cg12949760 | 11 | 2542862 | -0.499 | 0.228 | -0.12  | 1.645   | 0.053 | 5.3  | (1.846 to 10.974)  | 0.328 | 1.661   | (1.228 to 2.087)    |
| cg13071812 | 11 | 2466788 | -2.891 | 0.112 | -2.869 | 0.195   | 0.423 | 42.3 | (31.700 to 53.335) | 0.494 | 0.197   | (-0.084 to 0.476)   |
| cg13145504 | 11 | 2594840 | 1.297  | 0.18  | 1.069  | -1.252  | 0.108 | 10.8 | (5.110 to 18.724)  | 0.4   | -1.265  | (-1.634 to -0.888)  |
| cg13203297 | 11 | 2691249 | 2.943  | 0.196 | 3.253  | 1.566   | 0.062 | 6.2  | (2.298 to 12.290)  | 0.344 | 1.582   | (1.161 to 1.996)    |
| cg13253153 | 11 | 2826988 | 2.843  | 0.282 | 3.1    | 0.905   | 0.185 | 18.5 | (10.716 to 28.089) | 0.446 | 0.914   | (0.580 to 1.242)    |
| cg13298691 | 11 | 2470675 | 3.49   | 0.286 | 3.468  | -0.077  | 0.469 | 46.9 | (36.127 to 57.932) | 0.498 | -0.078  | (-0.355 to 0.200)   |
| cg13428066 | 11 | 2677768 | -0.914 | 0.216 | -0.284 | 2.892   | 0.003 | 0.3  | (0.019 to 1.137)   | 0.097 | 2.921   | (2.278 to 3.557)    |
| cg13444966 | 11 | 2705357 | 2.798  | 0.259 | 3.214  | 1.586   | 0.06  | 6    | (2.177 to 11.950)  | 0.34  | 1.602   | (1.178 to 2.019)    |
| cg13536051 | 11 | 2594099 | 2.192  | 0.199 | 2.139  | -0.263  | 0.397 | 39.7 | (29.243 to 50.713) | 0.491 | -0.266  | (-0.546 to 0.018)   |
| cg13577072 | 11 | 2715286 | 1.418  | 0.159 | 1.59   | 1.072   | 0.144 | 14.4 | (7.649 to 23.299)  | 0.426 | 1.083   | (0.729 to 1.429)    |
| cg13579167 | 11 | 2772852 | 3.052  | 0.195 | 3.71   | 3.335   | 0.001 | 0.1  | (0.002 to 0.408)   | 0.05  | 3.369   | (2.645 to 4.086)    |
| cg13612693 | 11 | 2602171 | 2.401  | 0.138 | 2.279  | -0.881  | 0.191 | 19.1 | (11.219 to 28.823) | 0.448 | -0.89   | (-1.215 to -0.559)  |
| cg13742956 | 11 | 2612876 | 2.343  | 0.192 | 2.389  | 0.236   | 0.407 | 40.7 | (30.214 to 51.756) | 0.492 | 0.238   | (-0.044 to 0.518)   |
| cg13840782 | 11 | 2482394 | 3.045  | 0.246 | 2.872  | -0.696  | 0.245 | 24.5 | (15.623 to 34.823) | 0.466 | -0.703  | (-1.010 to -0.390)  |
| cg13859639 | 11 | 2846716 | -0.382 | 0.142 | 0.074  | 3.182   | 0.001 | 0.1  | (0.005 to 0.590)   | 0.064 | 3.214   | (2.518 to 3.903)    |
| cg13880539 | 11 | 2696589 | 2.905  | 0.234 | 3.205  | 1.27    | 0.105 | 10.5 | (4.900 to 18.308)  | 0.397 | 1.283   | (0.904 to 1.655)    |
| cg13893637 | 11 | 2783554 | 2.019  | 0.185 | 2.139  | 0.645   | 0.261 | 26.1 | (16.985 to 36.560) | 0.47  | 0.652   | (0.344 to 0.955)    |
| cg14089425 | 11 | 2616834 | 2.221  | 0.445 | 1.949  | -0.605  | 0.274 | 27.4 | (18.123 to 37.977) | 0.473 | -0.611  | (-0.911 to -0.306)  |
| cg14243741 | 11 | 2721817 | 0.384  | 0.129 | -0.645 | -7.865  | 0     | 0    | (0.000 to 0.000)   | 0     | -7.944  | (-9.500 to -6.306)  |
| cg14384214 | 11 | 2817181 | 2.596  | 0.261 | 2.952  | 1.348   | 0.092 | 9.2  | (4.057 to 16.557)  | 0.384 | 1.362   | (0.972 to 1.744)    |
| cg14392746 | 11 | 2721207 | -0.151 | 0.118 | -1.192 | -8.737  | 0     | 0    | (0.000 to 0.000)   | 0     | -8.824  | (-10.547 to -7.010) |
| cg14408823 | 11 | 2458481 | 1.834  | 0.157 | 2.166  | 2.092   | 0.021 | 2.1  | (0.453 to 5.389)   | 0.236 | 2.113   | (1.608 to 2.610)    |
| cg14947466 | 11 | 2583705 | 2.385  | 0.156 | 2.284  | -0.639  | 0.263 | 26.3 | (17.169 to 36.791) | 0.47  | -0.645  | (-0.947 to -0.337)  |
| cg14958441 | 11 | 2721610 | -0.366 | 0.083 | -1.041 | -8.019  | 0     | 0    | (0.000 to 0.000)   | 0     | -8.099  | (-9.685 to -6.431)  |
| cg15033776 | 11 | 2463739 | 3.001  | 0.309 | 2.525  | -1.522  | 0.067 | 6.7  | (2.591 to 13.081)  | 0.352 | -1.537  | (-1.945 to -1.123)  |
| cg15074690 | 11 | 2571484 | 2.481  | 0.18  | 2.548  | 0.369   | 0.357 | 35.7 | (25.553 to 46.666) | 0.487 | 0.372   | (0.084 to 0.657)    |
| cg15422307 | 11 | 2693503 | 1.457  | 0.211 | 1.641  | 0.861   | 0.197 | 19.7 | (11.649 to 29.442) | 0.451 | 0.87    | (0.541 to 1.193)    |
| cg15467785 | 11 | 2783777 | 2.501  | 0.221 | 2.712  | 0.942   | 0.175 | 17.5 | (9.973 to 26.982)  | 0.442 | 0.952   | (0.613 to 1.283)    |
| cg15651941 | 11 | 2722084 | -0.065 | 0.135 | -1.556 | -10.945 | 0     | 0    | (0.000 to 0.000)   | 0     | -11.053 | (-13.203 to -8.791) |

|            |    |         |        |       |        |        |       |      |                    |       |        |                    |
|------------|----|---------|--------|-------|--------|--------|-------|------|--------------------|-------|--------|--------------------|
| cg15686157 | 11 | 2753885 | 1.801  | 0.178 | 1.914  | 0.627  | 0.267 | 26.7 | (17.491 to 37.194) | 0.471 | 0.634  | (0.327 to 0.935)   |
| cg15782852 | 11 | 2742507 | 2.629  | 0.181 | 2.48   | -0.817 | 0.209 | 20.9 | (12.652 to 30.852) | 0.455 | -0.825 | (-1.143 to -0.500) |
| cg15861694 | 11 | 2706745 | 2.24   | 0.128 | 1.947  | -2.263 | 0.014 | 1.4  | (0.247 to 3.986)   | 0.203 | -2.285 | (-2.811 to -1.752) |
| cg15910264 | 11 | 2783880 | 2.391  | 0.169 | 2.258  | -0.78  | 0.22  | 22   | (13.510 to 32.029) | 0.459 | -0.788 | (-1.103 to -0.467) |
| cg15932136 | 11 | 2465028 | 0.469  | 0.193 | 0.228  | -1.239 | 0.111 | 11.1 | (5.274 to 19.044)  | 0.402 | -1.251 | (-1.619 to -0.876) |
| cg16145209 | 11 | 2481909 | 2.145  | 0.128 | 2.259  | 0.875  | 0.193 | 19.3 | (11.352 to 29.015) | 0.449 | 0.884  | (0.553 to 1.208)   |
| cg16222896 | 11 | 2610580 | 2.886  | 0.209 | 3.127  | 1.147  | 0.129 | 12.9 | (6.505 to 21.328)  | 0.416 | 1.158  | (0.795 to 1.514)   |
| cg16324958 | 11 | 2828568 | 2.779  | 0.27  | 3.169  | 1.432  | 0.079 | 7.9  | (3.284 to 14.809)  | 0.369 | 1.446  | (1.045 to 1.841)   |
| cg16412789 | 11 | 2602926 | 3.337  | 0.205 | 3.456  | 0.577  | 0.283 | 28.3 | (18.948 to 38.987) | 0.475 | 0.582  | (0.280 to 0.880)   |
| cg16419342 | 11 | 2821200 | 2.811  | 0.188 | 2.761  | -0.268 | 0.395 | 39.5 | (29.074 to 50.532) | 0.491 | -0.27  | (-0.551 to 0.013)  |
| cg16434897 | 11 | 2772799 | 1.992  | 0.212 | 2.25   | 1.206  | 0.117 | 11.7 | (5.697 to 19.851)  | 0.407 | 1.217  | (0.847 to 1.581)   |
| cg16465939 | 11 | 2554410 | -1.79  | 0.143 | -1.663 | 0.882  | 0.191 | 19.1 | (11.208 to 28.807) | 0.448 | 0.891  | (0.559 to 1.216)   |
| cg16556677 | 11 | 2722401 | 1.771  | 0.244 | 1.341  | -1.746 | 0.044 | 4.4  | (1.375 to 9.436)   | 0.307 | -1.763 | (-2.204 to -1.314) |
| cg16609872 | 11 | 2828364 | 1.548  | 0.165 | 1.674  | 0.761  | 0.225 | 22.5 | (13.962 to 32.639) | 0.46  | 0.769  | (0.450 to 1.082)   |
| cg16739686 | 11 | 2721336 | 0.138  | 0.154 | -0.969 | -7.112 | 0     | 0    | (0.000 to 0.000)   | 0     | -7.183 | (-8.595 to -5.698) |
| cg16778148 | 11 | 2817922 | 2.575  | 0.173 | 2.51   | -0.373 | 0.356 | 35.6 | (25.414 to 46.511) | 0.486 | -0.376 | (-0.662 to -0.088) |
| cg16811455 | 11 | 2742553 | 1.712  | 0.158 | 2.009  | 1.864  | 0.034 | 3.4  | (0.957 to 7.847)   | 0.284 | 1.883  | (1.415 to 2.343)   |
| cg17035132 | 11 | 2504160 | 2.398  | 0.138 | 2.292  | -0.763 | 0.224 | 22.4 | (13.914 to 32.574) | 0.46  | -0.771 | (-1.084 to -0.452) |
| cg17128405 | 11 | 2700832 | 2.755  | 0.302 | 2.463  | -0.957 | 0.172 | 17.2 | (9.678 to 26.535)  | 0.44  | -0.967 | (-1.300 to -0.627) |
| cg17227621 | 11 | 2741033 | 2.849  | 0.157 | 2.96   | 0.703  | 0.243 | 24.3 | (15.428 to 34.572) | 0.465 | 0.71   | (0.397 to 1.018)   |
| cg17229197 | 11 | 2542688 | 2.699  | 0.195 | 2.183  | -2.617 | 0.006 | 0.6  | (0.062 to 2.023)   | 0.137 | -2.643 | (-3.231 to -2.049) |
| cg17255148 | 11 | 2563802 | 2.615  | 0.228 | 2.743  | 0.552  | 0.292 | 29.2 | (19.673 to 39.864) | 0.476 | 0.558  | (0.257 to 0.853)   |
| cg17291157 | 11 | 2482284 | 2.364  | 0.227 | 2.417  | 0.234  | 0.408 | 40.8 | (30.301 to 51.849) | 0.492 | 0.236  | (-0.046 to 0.516)  |
| cg17305275 | 11 | 2746675 | 2.566  | 0.28  | 2.86   | 1.038  | 0.152 | 15.2 | (8.219 to 24.238)  | 0.431 | 1.048  | (0.699 to 1.390)   |
| cg17333973 | 11 | 2847019 | -0.52  | 0.136 | 0.051  | 4.161  | 0     | 0    | (0.000 to 0.044)   | 0.011 | 4.203  | (3.325 to 5.074)   |
| cg17341170 | 11 | 2481545 | 2.697  | 0.149 | 2.897  | 1.333  | 0.094 | 9.4  | (4.210 to 16.885)  | 0.387 | 1.347  | (0.959 to 1.727)   |
| cg17402907 | 11 | 2697109 | 2.789  | 0.385 | 3.241  | 1.161  | 0.126 | 12.6 | (6.295 to 20.952)  | 0.414 | 1.173  | (0.808 to 1.530)   |
| cg17416793 | 11 | 2846932 | -0.253 | 0.205 | 0.262  | 2.494  | 0.008 | 0.8  | (0.102 to 2.580)   | 0.158 | 2.519  | (1.946 to 3.085)   |
| cg17494446 | 11 | 2569380 | 3.198  | 0.207 | 3.578  | 1.82   | 0.037 | 3.7  | (1.097 to 8.409)   | 0.292 | 1.838  | (1.378 to 2.291)   |
| cg17575811 | 11 | 2466409 | -2.758 | 0.227 | -2.838 | -0.348 | 0.365 | 36.5 | (26.255 to 47.447) | 0.488 | -0.351 | (-0.636 to -0.064) |
| cg17820828 | 11 | 2813298 | 0.227  | 0.391 | -0.063 | -0.734 | 0.233 | 23.3 | (14.633 to 33.531) | 0.462 | -0.742 | (-1.052 to -0.425) |

|            |    |         |        |       |        |        |       |      |                    |       |        |                    |
|------------|----|---------|--------|-------|--------|--------|-------|------|--------------------|-------|--------|--------------------|
| cg18016139 | 11 | 2470969 | 2.798  | 0.19  | 2.978  | 0.936  | 0.177 | 17.7 | (10.099 to 27.172) | 0.442 | 0.945  | (0.608 to 1.276)   |
| cg18106482 | 11 | 2680314 | 3.19   | 0.225 | 3.065  | -0.551 | 0.292 | 29.2 | (19.700 to 39.896) | 0.476 | -0.557 | (-0.852 to -0.256) |
| cg18272633 | 11 | 2848492 | 0.985  | 0.194 | 1.071  | 0.442  | 0.33  | 33   | (23.108 to 43.897) | 0.483 | 0.447  | (0.154 to 0.735)   |
| cg18450293 | 11 | 2548955 | 2.947  | 0.256 | 3.487  | 2.087  | 0.021 | 2.1  | (0.461 to 5.437)   | 0.237 | 2.107  | (1.604 to 2.604)   |
| cg18477587 | 11 | 2672740 | 2.359  | 0.191 | 2.591  | 1.207  | 0.117 | 11.7 | (5.678 to 19.817)  | 0.407 | 1.219  | (0.848 to 1.582)   |
| cg18729298 | 11 | 2555203 | -1.673 | 0.178 | -1.985 | -1.736 | 0.044 | 4.4  | (1.416 to 9.578)   | 0.309 | -1.753 | (-2.193 to -1.306) |
| cg18759359 | 11 | 2700935 | 2.868  | 0.2   | 2.56   | -1.527 | 0.067 | 6.7  | (2.555 to 12.987)  | 0.351 | -1.543 | (-1.951 to -1.127) |
| cg18865126 | 11 | 2596606 | 2.251  | 0.183 | 2.397  | 0.789  | 0.217 | 21.7 | (13.293 to 31.734) | 0.458 | 0.797  | (0.475 to 1.113)   |
| cg19095714 | 11 | 2645098 | 3.249  | 0.365 | 2.535  | -1.937 | 0.029 | 2.9  | (0.760 to 6.983)   | 0.268 | -1.956 | (-2.428 to -1.477) |
| cg19255554 | 11 | 2556743 | 1.55   | 0.152 | 1.69   | 0.91   | 0.184 | 18.4 | (10.617 to 27.943) | 0.445 | 0.919  | (0.585 to 1.247)   |
| cg19323901 | 11 | 2614062 | 2.272  | 0.135 | 2.196  | -0.561 | 0.289 | 28.9 | (19.401 to 39.536) | 0.476 | -0.567 | (-0.863 to -0.265) |
| cg19388050 | 11 | 2562647 | 3.178  | 0.252 | 3.16   | -0.07  | 0.472 | 47.2 | (36.402 to 58.213) | 0.498 | -0.071 | (-0.348 to 0.207)  |
| cg19670883 | 11 | 2502357 | -1.979 | 0.276 | -1.934 | 0.163  | 0.436 | 43.6 | (32.894 to 54.591) | 0.495 | 0.165  | (-0.115 to 0.443)  |
| cg19672982 | 11 | 2715154 | 2.705  | 0.232 | 3.14   | 1.857  | 0.035 | 3.5  | (0.979 to 7.939)   | 0.285 | 1.875  | (1.409 to 2.334)   |
| cg19678029 | 11 | 2722663 | 2.701  | 0.19  | 2.697  | -0.022 | 0.491 | 49.1 | (38.221 to 60.054) | 0.499 | -0.023 | (-0.300 to 0.255)  |
| cg19698309 | 11 | 2464959 | 2.626  | 0.184 | 2.508  | -0.636 | 0.264 | 26.4 | (17.239 to 36.878) | 0.47  | -0.643 | (-0.945 to -0.335) |
| cg19728223 | 11 | 2813121 | -2.152 | 0.411 | -2.432 | -0.675 | 0.252 | 25.2 | (16.192 to 35.554) | 0.468 | -0.681 | (-0.987 to -0.370) |
| cg19764489 | 11 | 2730616 | 1.699  | 0.233 | 1.51   | -0.801 | 0.214 | 21.4 | (13.023 to 31.365) | 0.456 | -0.809 | (-1.125 to -0.486) |
| cg19779211 | 11 | 2465491 | -2.104 | 0.17  | -2.072 | 0.184  | 0.427 | 42.7 | (32.115 to 53.772) | 0.494 | 0.186  | (-0.095 to 0.464)  |
| cg19852660 | 11 | 2846681 | 0.892  | 0.161 | 1.096  | 1.258  | 0.107 | 10.7 | (5.045 to 18.596)  | 0.399 | 1.27   | (0.893 to 1.641)   |
| cg19923326 | 11 | 2828778 | 1.862  | 0.2   | 2.115  | 1.248  | 0.109 | 10.9 | (5.168 to 18.837)  | 0.4   | 1.26   | (0.884 to 1.629)   |
| cg19936757 | 11 | 2452218 | 1.298  | 0.146 | 1.273  | -0.17  | 0.433 | 43.3 | (32.636 to 54.320) | 0.495 | -0.172 | (-0.450 to 0.109)  |
| cg19975301 | 11 | 2779993 | 2.732  | 0.177 | 2.619  | -0.632 | 0.265 | 26.5 | (17.366 to 37.037) | 0.471 | -0.638 | (-0.940 to -0.331) |
| cg20124933 | 11 | 2597564 | 3.192  | 0.298 | 3.051  | -0.468 | 0.321 | 32.1 | (22.289 to 42.953) | 0.481 | -0.472 | (-0.762 to -0.178) |
| cg20170839 | 11 | 2597721 | 2.698  | 0.143 | 2.718  | 0.139  | 0.445 | 44.5 | (33.781 to 55.516) | 0.496 | 0.141  | (-0.139 to 0.418)  |
| cg20402210 | 11 | 2697527 | 1.947  | 0.129 | 2.117  | 1.304  | 0.099 | 9.9  | (4.519 to 17.534)  | 0.391 | 1.317  | (0.933 to 1.693)   |
| cg20406758 | 11 | 2703128 | 1.917  | 0.228 | 1.705  | -0.923 | 0.18  | 18   | (10.352 to 27.550) | 0.444 | -0.932 | (-1.262 to -0.596) |
| cg20429584 | 11 | 2461432 | 2.686  | 0.207 | 2.719  | 0.157  | 0.438 | 43.8 | (33.106 to 54.812) | 0.495 | 0.159  | (-0.121 to 0.437)  |
| cg20533553 | 11 | 2464822 | 1.832  | 0.167 | 1.964  | 0.785  | 0.218 | 21.8 | (13.382 to 31.855) | 0.458 | 0.793  | (0.472 to 1.109)   |
| cg20689362 | 11 | 2694005 | 2.276  | 0.117 | 2.181  | -0.799 | 0.214 | 21.4 | (13.060 to 31.415) | 0.457 | -0.807 | (-1.124 to -0.484) |
| cg20699737 | 11 | 2721428 | 0.06   | 0.148 | -0.847 | -6.065 | 0     | 0    | (0.000 to 0.000)   | 0     | -6.126 | (-7.338 to -4.883) |

|            |    |         |        |       |        |         |       |      |                    |       |         |                     |
|------------|----|---------|--------|-------|--------|---------|-------|------|--------------------|-------|---------|---------------------|
| cg20751395 | 11 | 2594153 | 2.61   | 0.159 | 2.472  | -0.857  | 0.198 | 19.8 | (11.746 to 29.580) | 0.451 | -0.865  | (-1.188 to -0.537)  |
| cg20768429 | 11 | 2569832 | 3.186  | 0.261 | 3.462  | 1.049   | 0.15  | 15   | (8.029 to 23.928)  | 0.429 | 1.059   | (0.709 to 1.403)    |
| cg20828897 | 11 | 2610595 | 2.659  | 0.228 | 2.712  | 0.23    | 0.41  | 41   | (30.447 to 52.005) | 0.492 | 0.232   | (-0.050 to 0.512)   |
| cg20850984 | 11 | 2569120 | 2.619  | 0.246 | 2.642  | 0.092   | 0.463 | 46.3 | (35.544 to 57.335) | 0.497 | 0.093   | (-0.185 to 0.371)   |
| cg20921686 | 11 | 2604499 | 2.552  | 0.195 | 2.876  | 1.64    | 0.054 | 5.4  | (1.870 to 11.049)  | 0.329 | 1.656   | (1.224 to 2.081)    |
| cg21130221 | 11 | 2848310 | -0.397 | 0.239 | -0.062 | 1.389   | 0.086 | 8.6  | (3.668 to 15.696)  | 0.377 | 1.403   | (1.007 to 1.791)    |
| cg21137515 | 11 | 2721857 | 0.066  | 0.097 | -0.941 | -10.324 | 0     | 0    | (0.000 to 0.000)   | 0     | -10.426 | (-12.456 to -8.290) |
| cg21190593 | 11 | 2451058 | 1.113  | 0.268 | 0.882  | -0.851  | 0.2   | 20   | (11.885 to 29.777) | 0.452 | -0.859  | (-1.181 to -0.531)  |
| cg21695475 | 11 | 2612825 | 2.453  | 0.18  | 2.546  | 0.511   | 0.306 | 30.6 | (20.932 to 41.365) | 0.479 | 0.516   | (0.218 to 0.809)    |
| cg21752270 | 11 | 2813528 | 1.472  | 0.168 | 1.809  | 1.988   | 0.026 | 2.6  | (0.643 to 6.422)   | 0.257 | 2.008   | (1.520 to 2.488)    |
| cg22047766 | 11 | 2560864 | 2.714  | 0.18  | 2.571  | -0.785  | 0.218 | 21.8 | (13.383 to 31.856) | 0.458 | -0.793  | (-1.108 to -0.472)  |
| cg22195512 | 11 | 2602980 | 2.085  | 0.124 | 1.917  | -1.346  | 0.092 | 9.2  | (4.079 to 16.605)  | 0.384 | -1.359  | (-1.742 to -0.970)  |
| cg22239603 | 11 | 2690304 | 2.751  | 0.167 | 2.803  | 0.305   | 0.381 | 38.1 | (27.761 to 49.105) | 0.49  | 0.308   | (0.022 to 0.590)    |
| cg22296808 | 11 | 2560641 | 2.054  | 0.136 | 2.217  | 1.188   | 0.12  | 12   | (5.929 to 20.284)  | 0.41  | 1.2     | (0.832 to 1.561)    |
| cg23040992 | 11 | 2603590 | 2.657  | 0.19  | 2.692  | 0.183   | 0.428 | 42.8 | (32.136 to 53.795) | 0.494 | 0.185   | (-0.095 to 0.464)   |
| cg23049234 | 11 | 2595718 | 2.824  | 0.183 | 2.874  | 0.268   | 0.395 | 39.5 | (29.048 to 50.503) | 0.491 | 0.271   | (-0.013 to 0.552)   |
| cg23267890 | 11 | 2464970 | 0.42   | 0.196 | 0.222  | -1.003  | 0.16  | 16   | (8.837 to 25.228)  | 0.435 | -1.013  | (-1.351 to -0.667)  |
| cg23272088 | 11 | 2504813 | 2.916  | 0.296 | 2.272  | -2.153  | 0.018 | 1.8  | (0.366 to 4.846)   | 0.224 | -2.175  | (-2.682 to -1.660)  |
| cg23545049 | 11 | 2569474 | 2.576  | 0.275 | 2.671  | 0.341   | 0.367 | 36.7 | (26.489 to 47.707) | 0.488 | 0.345   | (0.058 to 0.628)    |
| cg23623667 | 11 | 2465485 | -2.406 | 0.248 | -2.643 | -0.946  | 0.174 | 17.4 | (9.902 to 26.875)  | 0.441 | -0.955  | (-1.287 to -0.617)  |
| cg23750514 | 11 | 2790418 | 1.67   | 0.275 | 2.162  | 1.769   | 0.042 | 4.2  | (1.282 to 9.102)   | 0.303 | 1.787   | (1.334 to 2.232)    |
| cg23801748 | 11 | 2482735 | 3.336  | 0.204 | 3.085  | -1.221  | 0.114 | 11.4 | (5.494 to 19.468)  | 0.405 | -1.233  | (-1.599 to -0.861)  |
| cg23903244 | 11 | 2812987 | -1.949 | 0.502 | -2.208 | -0.511  | 0.306 | 30.6 | (20.926 to 41.358) | 0.479 | -0.516  | (-0.809 to -0.218)  |
| cg23968213 | 11 | 2481965 | 2.034  | 0.166 | 2.04   | 0.035   | 0.486 | 48.6 | (37.730 to 59.560) | 0.499 | 0.035   | (-0.242 to 0.313)   |
| cg24073146 | 11 | 2543204 | 2.712  | 0.176 | 2.784  | 0.406   | 0.343 | 34.3 | (24.281 to 45.235) | 0.485 | 0.41    | (0.120 to 0.697)    |
| cg24079038 | 11 | 2465279 | -0.404 | 0.17  | -0.672 | -1.558  | 0.063 | 6.3  | (2.349 to 12.430)  | 0.345 | -1.574  | (-1.987 to -1.154)  |
| cg24089935 | 11 | 2554295 | -3.528 | 0.248 | -3.453 | 0.299   | 0.383 | 38.3 | (27.961 to 49.324) | 0.49  | 0.302   | (0.017 to 0.584)    |
| cg24376802 | 11 | 2485050 | 2.305  | 0.137 | 2.192  | -0.819  | 0.208 | 20.8 | (12.592 to 30.769) | 0.455 | -0.827  | (-1.146 to -0.502)  |
| cg24478595 | 11 | 2817646 | 2.899  | 0.15  | 2.908  | 0.065   | 0.474 | 47.4 | (36.579 to 58.393) | 0.498 | 0.066   | (-0.212 to 0.343)   |
| cg24492694 | 11 | 2595605 | 3.005  | 0.375 | 2.902  | -0.272  | 0.394 | 39.4 | (28.935 to 50.381) | 0.491 | -0.274  | (-0.555 to 0.010)   |
| cg24609402 | 11 | 2598247 | 2.741  | 0.174 | 2.694  | -0.267  | 0.395 | 39.5 | (29.089 to 50.548) | 0.491 | -0.27   | (-0.551 to 0.014)   |

|            |    |         |        |       |        |         |       |      |                    |       |         |                      |
|------------|----|---------|--------|-------|--------|---------|-------|------|--------------------|-------|---------|----------------------|
| cg24725201 | 11 | 2753818 | 2.934  | 0.174 | 3.048  | 0.65    | 0.259 | 25.9 | (16.849 to 36.388) | 0.469 | 0.657   | (0.348 to 0.960)     |
| cg24932449 | 11 | 2672613 | 2.497  | 0.221 | 2.408  | -0.402  | 0.345 | 34.5 | (24.426 to 45.399) | 0.485 | -0.406  | (-0.693 to -0.116)   |
| cg25173341 | 11 | 2828525 | 1.931  | 1.066 | 2.528  | 0.554   | 0.291 | 29.1 | (19.629 to 39.812) | 0.476 | 0.559   | (0.258 to 0.855)     |
| cg25175863 | 11 | 2604391 | 1.332  | 0.117 | 1.484  | 1.291   | 0.101 | 10.1 | (4.659 to 17.823)  | 0.393 | 1.304   | (0.922 to 1.679)     |
| cg25204743 | 11 | 2715837 | 0.661  | 0.176 | 0.333  | -1.838  | 0.036 | 3.6  | (1.038 to 8.175)   | 0.289 | -1.857  | (-2.312 to -1.393)   |
| cg25223664 | 11 | 2600975 | 1.768  | 0.16  | 1.936  | 1.038   | 0.152 | 15.2 | (8.223 to 24.244)  | 0.431 | 1.048   | (0.698 to 1.390)     |
| cg25266888 | 11 | 2482594 | 2.268  | 0.219 | 1.867  | -1.813  | 0.038 | 3.8  | (1.123 to 8.509)   | 0.294 | -1.831  | (-2.283 to -1.372)   |
| cg25306939 | 11 | 2722086 | 0.042  | 0.107 | -1.348 | -12.894 | 0     | 0    | (0.000 to 0.000)   | 0     | -13.022 | (-15.549 to -10.363) |
| cg25356736 | 11 | 2775022 | 0.457  | 0.227 | 0.594  | 0.599   | 0.276 | 27.6 | (18.306 to 38.203) | 0.473 | 0.605   | (0.300 to 0.904)     |
| cg25513073 | 11 | 2481641 | 2.143  | 0.146 | 2.057  | -0.585  | 0.281 | 28.1 | (18.702 to 38.687) | 0.474 | -0.591  | (-0.889 to -0.287)   |
| cg25554751 | 11 | 2548989 | 2.761  | 0.147 | 2.582  | -1.202  | 0.118 | 11.8 | (5.742 to 19.936)  | 0.408 | -1.214  | (-1.577 to -0.844)   |
| cg25741120 | 11 | 2482223 | 2.872  | 0.202 | 2.611  | -1.284  | 0.103 | 10.3 | (4.742 to 17.991)  | 0.395 | -1.297  | (-1.670 to -0.916)   |
| cg25786675 | 11 | 2621273 | 3.084  | 0.206 | 3.029  | -0.267  | 0.395 | 39.5 | (29.091 to 50.549) | 0.491 | -0.27   | (-0.551 to 0.014)    |
| cg25946538 | 11 | 2482531 | 1.634  | 0.123 | 1.438  | -1.584  | 0.06  | 6    | (2.189 to 11.985)  | 0.34  | -1.6    | (-2.016 to -1.176)   |
| cg25976755 | 11 | 2481495 | 2.814  | 0.189 | 2.916  | 0.534   | 0.298 | 29.8 | (20.219 to 40.518) | 0.478 | 0.539   | (0.240 to 0.834)     |
| cg26094482 | 11 | 2722073 | -0.27  | 0.118 | -1.261 | -8.344  | 0     | 0    | (0.000 to 0.000)   | 0     | -8.427  | (-10.075 to -6.693)  |
| cg26104781 | 11 | 2721383 | 0.225  | 0.151 | -0.858 | -7.093  | 0     | 0    | (0.000 to 0.000)   | 0     | -7.164  | (-8.572 to -5.682)   |
| cg26190483 | 11 | 2689695 | 3.442  | 0.2   | 3.351  | -0.453  | 0.326 | 32.6 | (22.742 to 43.477) | 0.482 | -0.458  | (-0.747 to -0.164)   |
| cg26344859 | 11 | 2584629 | 2.518  | 0.143 | 2.463  | -0.381  | 0.352 | 35.2 | (25.124 to 46.186) | 0.486 | -0.385  | (-0.671 to -0.096)   |
| cg26411299 | 11 | 2598653 | 2.603  | 0.194 | 2.716  | 0.574   | 0.284 | 28.4 | (19.020 to 39.074) | 0.475 | 0.58    | (0.277 to 0.877)     |
| cg26417642 | 11 | 2466095 | -3.592 | 0.222 | -3.176 | 1.851   | 0.035 | 3.5  | (0.997 to 8.009)   | 0.287 | 1.87    | (1.404 to 2.328)     |
| cg26438846 | 11 | 2731392 | 2.604  | 0.3   | 2.528  | -0.251  | 0.401 | 40.1 | (29.663 to 51.166) | 0.492 | -0.254  | (-0.534 to 0.029)    |
| cg26504274 | 11 | 2485409 | 3.559  | 0.214 | 3.269  | -1.346  | 0.092 | 9.2  | (4.079 to 16.604)  | 0.384 | -1.359  | (-1.742 to -0.970)   |
| cg26512142 | 11 | 2554198 | -2.898 | 0.091 | -2.911 | -0.137  | 0.446 | 44.6 | (33.871 to 55.608) | 0.496 | -0.138  | (-0.416 to 0.141)    |
| cg26524638 | 11 | 2481449 | 2.718  | 0.192 | 2.966  | 1.278   | 0.104 | 10.4 | (4.815 to 18.138)  | 0.396 | 1.29    | (0.910 to 1.663)     |
| cg26547719 | 11 | 2721437 | -0.009 | 0.126 | -0.793 | -6.184  | 0     | 0    | (0.000 to 0.000)   | 0     | -6.245  | (-7.480 to -4.979)   |
| cg26639864 | 11 | 2569788 | 2.905  | 0.229 | 3.394  | 2.114   | 0.02  | 2    | (0.420 to 5.187)   | 0.232 | 2.135   | (1.627 to 2.636)     |
| cg26671281 | 11 | 2828214 | 1.626  | 0.16  | 1.836  | 1.302   | 0.099 | 9.9  | (4.540 to 17.578)  | 0.391 | 1.315   | (0.932 to 1.691)     |
| cg26709929 | 11 | 2482240 | 2.714  | 0.287 | 2.539  | -0.604  | 0.274 | 27.4 | (18.138 to 37.995) | 0.473 | -0.611  | (-0.910 to -0.306)   |
| cg26728427 | 11 | 2610741 | 2.684  | 0.161 | 2.849  | 1.016   | 0.157 | 15.7 | (8.594 to 24.843)  | 0.433 | 1.026   | (0.679 to 1.366)     |
| cg26750319 | 11 | 2593960 | 2.739  | 0.153 | 2.724  | -0.091  | 0.464 | 46.4 | (35.594 to 57.386) | 0.497 | -0.092  | (-0.369 to 0.186)    |



|            |    |         |        |       |        |         |       |      |                    |       |         |                     |
|------------|----|---------|--------|-------|--------|---------|-------|------|--------------------|-------|---------|---------------------|
| cg26879282 | 11 | 2817991 | 3.01   | 0.25  | 2.964  | -0.18   | 0.429 | 42.9 | (32.263 to 53.929) | 0.494 | -0.182  | (-0.460 to 0.099)   |
| cg26884837 | 11 | 2563897 | 2.367  | 0.293 | 2.653  | 0.964   | 0.17  | 17   | (9.544 to 26.329)  | 0.439 | 0.974   | (0.633 to 1.308)    |
| cg26908876 | 11 | 2722076 | -0.259 | 0.128 | -1.54  | -9.906  | 0     | 0    | (0.000 to 0.000)   | 0     | -10.005 | (-11.954 to -7.953) |
| cg26929889 | 11 | 2562496 | 3.132  | 0.183 | 2.839  | -1.59   | 0.059 | 5.9  | (2.154 to 11.886)  | 0.339 | -1.605  | (-2.023 to -1.181)  |
| cg26958174 | 11 | 2840699 | 2.614  | 0.161 | 2.431  | -1.128  | 0.132 | 13.2 | (6.777 to 21.809)  | 0.419 | -1.139  | (-1.493 to -0.779)  |
| cg26963277 | 11 | 2722407 | 2.274  | 0.224 | 1.842  | -1.912  | 0.031 | 3.1  | (0.823 to 7.273)   | 0.273 | -1.931  | (-2.398 to -1.456)  |
| cg27050114 | 11 | 2826795 | 3.172  | 0.325 | 3.157  | -0.048  | 0.481 | 48.1 | (37.253 to 59.077) | 0.499 | -0.048  | (-0.325 to 0.230)   |
| cg27119222 | 11 | 2720229 | 0.321  | 0.145 | -1.235 | -10.634 | 0     | 0    | (0.000 to 0.000)   | 0     | -10.739 | (-12.829 to -8.540) |
| cg27246251 | 11 | 2559736 | 2.32   | 0.129 | 2.224  | -0.74   | 0.231 | 23.1 | (14.494 to 33.347) | 0.462 | -0.747  | (-1.058 to -0.430)  |
| cg27323091 | 11 | 2721619 | 0.064  | 0.099 | -0.585 | -6.463  | 0     | 0    | (0.000 to 0.000)   | 0     | -6.527  | (-7.816 to -5.207)  |
| cg27364242 | 11 | 2471064 | 1.837  | 0.135 | 2.213  | 2.759   | 0.004 | 0.4  | (0.034 to 1.510)   | 0.115 | 2.787   | (2.167 to 3.399)    |
| cg27604721 | 11 | 2722258 | 0.411  | 0.132 | -0.572 | -7.399  | 0     | 0    | (0.000 to 0.000)   | 0     | -7.473  | (-8.940 to -5.930)  |
| cg27639104 | 11 | 2482929 | 3.267  | 0.24  | 2.848  | -1.733  | 0.045 | 4.5  | (1.426 to 9.613)   | 0.31  | -1.751  | (-2.190 to -1.304)  |

**Supplementary Table 10. Performance of CH-test in detecting hypomethylation at the SNRPN locus in MLMD samples.** The table presents 450k DNA methylation data across *SNRPN* region in BWS-MLMD4 and TND-MLMD5 samples. The point estimate represents the estimated percentage of the control population that would be expected to obtain lower score than the case and 95% confidence interval of point estimates were calculated from the noncentrality parameter from a noncentral t-distribution along with the point and interval estimates of the effect size. Here, ILMNID = Illumina Infinium HumanMethylation450 array probe ID, Chr = chromosome, Map information = genomic location (hg19), Mean = Control mean, and SD = control standard deviation, adjusted-p = Adjusted p-value using false discovery rate method,  $z_{cc}$  = point estimate of the effect size.

| Case ID   | ILMNID     | Chr | Map Information | Control group |       | Case score | Significance test |          | Estimated percentage of the control population obtaining a lower score than the case |                     | Estimated effect size |          |                    |
|-----------|------------|-----|-----------------|---------------|-------|------------|-------------------|----------|--------------------------------------------------------------------------------------|---------------------|-----------------------|----------|--------------------|
|           |            |     |                 | Mean          | SD    |            | t-value           | p-value  | Point                                                                                | (95%CI)             | Adjusted p            | $z_{cc}$ | (95%CI)            |
| BWS-MLMD4 | cg22259765 | 15  | 25119502        | -0.7          | 0.261 | -0.179     | 1.977             | 0.027    | 2.7                                                                                  | (0.666 to 6.533)    | 0.26                  | 1.997    | (1.511 to 2.475)   |
| TND-MLMD5 | cg22259765 | 15  | 25119502        | -0.164        | 0.291 | 0.16       | 1.104             | 0.138    | 13.8                                                                                 | (7.143 to 22.443)   | 0.422                 | 1.115    | (0.757 to 1.465)   |
| BWS-MLMD4 | cg27644292 | 15  | 25123287        | 0.333         | 0.353 | -1.11      | -4.045            | 9.25E-05 | 0.00925                                                                              | (4.01E-05 to 0.062) | 0.014                 | -4.085   | (-4.935 to -3.230) |
| TND-MLMD5 | cg27644292 | 15  | 25123287        | 0.653         | 0.479 | -1.121     | -3.666            | 0        | 0                                                                                    | (0.000 to 0.176)    | 0.045                 | -3.702   | (-4.481 to -2.918) |
| BWS-MLMD4 | cg08560373 | 15  | 25123381        | -0.975        | 0.344 | -1.842     | -2.495            | 0.008    | 0.8                                                                                  | (0.102 to 2.578)    | 0.158                 | -2.52    | (-3.086 to -1.947) |
| TND-MLMD5 | cg08560373 | 15  | 25123381        | -0.652        | 0.516 | -1.942     | -2.476            | 0.008    | 0.8                                                                                  | (0.110 to 2.676)    | 0.194                 | -2.5     | (-3.063 to -1.931) |
| BWS-MLMD4 | cg25657700 | 15  | 25123491        | 0.409         | 0.207 | -0.509     | -4.399            | 2.93E-05 | 0.00293                                                                              | (4.58E-06 to 0.022) | 0.007                 | -4.443   | (-5.342 to -3.520) |
| TND-MLMD5 | cg25657700 | 15  | 25123491        | 0.717         | 0.247 | -0.453     | -4.688            | 1.12E-05 | 0.00112                                                                              | (6.41E-07 to 0.009) | 0.005                 | -4.735   | (-5.689 to -3.758) |
| BWS-MLMD4 | cg24993443 | 15  | 25123549        | -0.197        | 0.389 | -0.84      | -1.634            | 0.054    | 5.4                                                                                  | (1.903 to 11.148)   | 0.33                  | -1.65    | (-2.074 to -1.219) |
| TND-MLMD5 | cg24993443 | 15  | 25123549        | 0.025         | 0.529 | -0.94      | -1.807            | 0.038    | 3.8                                                                                  | (1.144 to 8.590)    | 0.314                 | -1.825   | (-2.275 to -1.366) |
| BWS-MLMD4 | cg21870668 | 15  | 25123731        | -0.298        | 0.244 | -1.205     | -3.67             | 0        | 0                                                                                    | (0.000 to 0.174)    | 0.028                 | -3.707   | (-4.486 to -2.922) |
| TND-MLMD5 | cg21870668 | 15  | 25123731        | 0.164         | 0.311 | -0.974     | -3.622            | 0        | 0                                                                                    | (0.000 to 0.198)    | 0.048                 | -3.658   | (-4.428 to -2.881) |
| BWS-MLMD4 | cg21061553 | 15  | 25124213        | 1.975         | 0.345 | 2.264      | 0.827             | 0.206    | 20.6                                                                                 | (12.403 to 30.506)  | 0.454                 | 0.836    | (0.510 to 1.155)   |
| TND-MLMD5 | cg21061553 | 15  | 25124213        | 2.269         | 0.387 | 2.583      | 0.804             | 0.213    | 21.3                                                                                 | (12.948 to 31.261)  | 0.454                 | 0.812    | (0.488 to 1.129)   |
| BWS-MLMD4 | cg12509344 | 15  | 25127701        | 2.655         | 0.295 | 2.693      | 0.128             | 0.449    | 44.9                                                                                 | (34.207 to 55.957)  | 0.496                 | 0.129    | (-0.150 to 0.407)  |
| TND-MLMD5 | cg12509344 | 15  | 25127701        | 2.664         | 0.252 | 2.645      | -0.075            | 0.47     | 47                                                                                   | (36.204 to 58.010)  | 0.497                 | -0.076   | (-0.353 to 0.202)  |
| BWS-MLMD4 | cg23075611 | 15  | 25145254        | -0.378        | 0.142 | -1.039     | -4.621            | 1.40E-05 | 0.0014                                                                               | (1.02E-06 to 0.011) | 0.004                 | -4.667   | (-5.608 to -3.703) |
| TND-MLMD5 | cg23075611 | 15  | 25145254        | -0.027        | 0.158 | -0.921     | -5.615            | 4.57E-07 | 4.57E-05                                                                             | (5.31E-10 to 0.000) | 0.00038               | -5.67    | (-6.798 to -4.515) |
| BWS-MLMD4 | cg09206878 | 15  | 25165585        | 1.496         | 0.256 | 1.533      | 0.145             | 0.443    | 44.3                                                                                 | (33.572 to 55.298)  | 0.496                 | 0.146    | (-0.133 to 0.424)  |

|           |            |    |          |        |       |        |         |          |          |                        |          |         |                      |
|-----------|------------|----|----------|--------|-------|--------|---------|----------|----------|------------------------|----------|---------|----------------------|
| TND-MLMD5 | cg09206878 | 15 | 25165585 | 1.757  | 0.237 | 2.405  | 2.705   | 0.005    | 0.5      | (0.043 to 1.692)       | 0.156    | 2.732   | (2.122 to 3.334)     |
| BWS-MLMD4 | cg11152012 | 15 | 25196084 | 0.54   | 0.147 | 0.29   | -1.685  | 0.049    | 4.9      | (1.643 to 10.336)      | 0.319    | -1.702  | (-2.134 to -1.263)   |
| TND-MLMD5 | cg11152012 | 15 | 25196084 | 0.713  | 0.176 | 0.584  | -0.724  | 0.236    | 23.6     | (14.898 to 33.881)     | 0.461    | -0.731  | (-1.041 to -0.416)   |
| BWS-MLMD4 | cg21746532 | 15 | 25198793 | 2.171  | 0.402 | 2.731  | 1.379   | 0.087    | 8.7      | (3.762 to 15.908)      | 0.378    | 1.392   | (0.998 to 1.779)     |
| TND-MLMD5 | cg21746532 | 15 | 25198793 | 2.289  | 0.223 | 2.698  | 1.818   | 0.038    | 3.8      | (1.105 to 8.442)       | 0.312    | 1.836   | (1.376 to 2.289)     |
| BWS-MLMD4 | cg01432432 | 15 | 25199028 | 2.931  | 0.259 | 2.938  | 0.029   | 0.489    | 48.9     | (37.980 to 59.811)     | 0.499    | 0.029   | (-0.248 to 0.306)    |
| TND-MLMD5 | cg01432432 | 15 | 25199028 | 2.936  | 0.185 | 3.597  | 3.547   | 0        | 0        | (0.001 to 0.240)       | 0.055    | 3.582   | (2.820 to 4.339)     |
| BWS-MLMD4 | cg08372135 | 15 | 25199057 | 3.143  | 0.245 | 3.681  | 2.171   | 0.017    | 1.7      | (0.343 to 4.693)       | 0.22     | 2.193   | (1.675 to 2.703)     |
| TND-MLMD5 | cg08372135 | 15 | 25199057 | 3.038  | 0.214 | 3.02   | -0.088  | 0.465    | 46.5     | (35.728 to 57.524)     | 0.497    | -0.088  | (-0.366 to 0.190)    |
| BWS-MLMD4 | cg03858387 | 15 | 25199164 | 1.483  | 0.173 | 1.711  | 1.304   | 0.099    | 9.9      | (4.516 to 17.529)      | 0.391    | 1.317   | (0.933 to 1.694)     |
| TND-MLMD5 | cg03858387 | 15 | 25199164 | 1.571  | 0.207 | 1.99   | 2.001   | 0.025    | 2.5      | (0.615 to 6.278)       | 0.278    | 2.021   | (1.532 to 2.504)     |
| BWS-MLMD4 | cg02152271 | 15 | 25199270 | 2.38   | 0.328 | 2.122  | -0.778  | 0.22     | 22       | (13.564 to 32.102)     | 0.459    | -0.786  | (-1.100 to -0.465)   |
| TND-MLMD5 | cg02152271 | 15 | 25199270 | 2.433  | 0.165 | 2.378  | -0.334  | 0.37     | 37       | (26.741 to 47.985)     | 0.486    | -0.337  | (-0.621 to -0.051)   |
| BWS-MLMD4 | cg18506672 | 15 | 25200253 | -0.132 | 0.104 | -1.413 | -12.226 | 1.11E-16 | 1.11E-14 | (1.66E-47 to 4.43E-21) | 5.37E-13 | -12.347 | (-14.745 to -9.824)  |
| TND-MLMD5 | cg18506672 | 15 | 25200253 | 0.082  | 0.179 | -2.012 | -11.598 | 6.66E-16 | 6.66E-14 | (9.11E-43 to 5.94E-19) | 1.77E-12 | -11.713 | (-13.989 to -9.318)  |
| BWS-MLMD4 | cg02125271 | 15 | 25200406 | 0.887  | 0.139 | -0.47  | -9.694  | 2.80E-13 | 2.80E-11 | (6.49E-30 to 3.56E-13) | 7.68E-10 | -9.79   | (-11.698 to -7.782)  |
| TND-MLMD5 | cg02125271 | 15 | 25200406 | 0.931  | 0.139 | -1.141 | -14.718 | 0        | 0        | (9.54E-69 to 1.33E-30) | 0        | -14.864 | (-17.744 to -11.832) |
| BWS-MLMD4 | cg26875073 | 15 | 25200490 | 0.17   | 0.179 | -1.382 | -8.593  | 1.20E-11 | 1.20E-09 | (1.62E-23 to 2.72E-10) | 2.52E-08 | -8.678  | (-10.374 to -6.894)  |
| TND-MLMD5 | cg26875073 | 15 | 25200490 | 0.021  | 0.215 | -1.646 | -7.689  | 2.86E-10 | 2.86E-08 | (7.86E-19 to 3.56E-08) | 4.21E-07 | -7.765  | (-9.288 to -6.164)   |
| BWS-MLMD4 | cg22159025 | 15 | 25201020 | -0.45  | 0.189 | -1.972 | -7.965  | 1.08E-10 | 1.08E-08 | (3.29E-20 to 8.46E-09) | 1.99E-07 | -8.045  | (-9.620 to -6.387)   |
| TND-MLMD5 | cg22159025 | 15 | 25201020 | -0.236 | 0.245 | -1.781 | -6.232  | 5.13E-08 | 5.13E-06 | (2.37E-12 to 2.60E-05) | 5.29E-05 | -6.294  | (-7.539 to -5.019)   |
| BWS-MLMD4 | cg22555495 | 15 | 25201224 | -0.168 | 0.086 | -1.165 | -11.464 | 8.88E-16 | 8.88E-14 | (8.61E-42 to 1.63E-18) | 3.69E-12 | -11.578 | (-13.828 to -9.210)  |
| TND-MLMD5 | cg22555495 | 15 | 25201224 | 0.374  | 0.136 | -1.033 | -10.268 | 4.15E-14 | 4.15E-12 | (1.50E-33 to 8.23E-15) | 9.59E-11 | -10.37  | (-12.389 to -8.245)  |
| BWS-MLMD4 | cg01614564 | 15 | 25201429 | 0.165  | 0.104 | -0.706 | -8.295  | 3.39E-11 | 3.39E-09 | (6.45E-22 to 1.43E-09) | 6.74E-08 | -8.378  | (-10.017 to -6.653)  |
| TND-MLMD5 | cg01614564 | 15 | 25201429 | 0.662  | 0.096 | -0.567 | -12.642 | 0        | 0        | (8.75E-51 to 1.50E-22) | 0        | -12.768 | (-15.246 to -10.160) |
| BWS-MLMD4 | cg13073261 | 15 | 25201732 | -0.01  | 0.129 | -1.306 | -9.926  | 1.29E-13 | 1.29E-11 | (2.31E-31 to 7.94E-14) | 3.71E-10 | -10.025 | (-11.978 to -7.970)  |
| TND-MLMD5 | cg13073261 | 15 | 25201732 | 0.002  | 0.17  | -1.325 | -7.726  | 2.51E-10 | 2.51E-08 | (5.18E-19 to 2.94E-08) | 3.71E-07 | -7.803  | (-9.332 to -6.193)   |
| BWS-MLMD4 | cg20775837 | 15 | 25203270 | 2.194  | 0.321 | 2.293  | 0.304   | 0.381    | 38.1     | (27.797 to 49.144)     | 0.49     | 0.307   | (0.021 to 0.589)     |
| TND-MLMD5 | cg20775837 | 15 | 25203270 | 2.175  | 0.245 | 2.668  | 1.994   | 0.026    | 2.6      | (0.630 to 6.354)       | 0.279    | 2.014   | (1.526 to 2.495)     |
| BWS-MLMD4 | cg14851390 | 15 | 25215375 | 2.34   | 0.253 | 2.214  | -0.496  | 0.311    | 31.1     | (21.377 to 41.889)     | 0.48     | -0.501  | (-0.793 to -0.205)   |
| TND-MLMD5 | cg14851390 | 15 | 25215375 | 2.247  | 0.232 | 2.564  | 1.354   | 0.091    | 9.1      | (3.999 to 16.432)      | 0.39     | 1.368   | (0.977 to 1.751)     |

|           |            |    |          |       |       |       |        |          |          |                     |       |        |                    |
|-----------|------------|----|----------|-------|-------|-------|--------|----------|----------|---------------------|-------|--------|--------------------|
| BWS-MLMD4 | cg25705379 | 15 | 25221513 | 1.87  | 0.224 | 2.061 | 0.841  | 0.202    | 20.2     | (12.093 to 30.071)  | 0.453 | 0.85   | (0.522 to 1.170)   |
| TND-MLMD5 | cg25705379 | 15 | 25221513 | 2.107 | 0.193 | 2.401 | 1.508  | 0.069    | 6.9      | (2.691 to 13.342)   | 0.366 | 1.523  | (1.110 to 1.928)   |
| BWS-MLMD4 | cg04195863 | 15 | 25223574 | 1.786 | 0.205 | 2.25  | 2.246  | 0.015    | 1.5      | (0.263 to 4.112)    | 0.206 | 2.268  | (1.738 to 2.791)   |
| TND-MLMD5 | cg04195863 | 15 | 25223574 | 2.013 | 0.273 | 2.599 | 2.12   | 0.02     | 2        | (0.410 to 5.129)    | 0.256 | 2.142  | (1.632 to 2.643)   |
| BWS-MLMD4 | cg26582085 | 15 | 25225929 | 2.559 | 0.286 | 3.089 | 1.835  | 0.036    | 3.6      | (1.047 to 8.211)    | 0.29  | 1.854  | (1.391 to 2.309)   |
| TND-MLMD5 | cg26582085 | 15 | 25225929 | 2.909 | 0.275 | 2.683 | -0.814 | 0.21     | 21       | (12.716 to 30.942)  | 0.453 | -0.822 | (-1.140 to -0.498) |
| BWS-MLMD4 | cg26724572 | 15 | 25226703 | 2.829 | 0.281 | 2.83  | 0.002  | 0.499    | 49.9     | (38.991 to 60.827)  | 0.5   | 0.002  | (-0.275 to 0.280)  |
| TND-MLMD5 | cg26724572 | 15 | 25226703 | 2.827 | 0.183 | 2.745 | -0.44  | 0.331    | 33.1     | (23.168 to 43.966)  | 0.48  | -0.445 | (-0.733 to -0.152) |
| BWS-MLMD4 | cg11166999 | 15 | 25226929 | 3.24  | 0.353 | 3.194 | -0.131 | 0.448    | 44.8     | (34.104 to 55.850)  | 0.496 | -0.132 | (-0.410 to 0.147)  |
| TND-MLMD5 | cg11166999 | 15 | 25226929 | 3.266 | 0.257 | 3.307 | 0.16   | 0.437    | 43.7     | (33.011 to 54.713)  | 0.494 | 0.161  | (-0.118 to 0.440)  |
| BWS-MLMD4 | cg22934878 | 15 | 25227003 | 3.078 | 0.232 | 3.312 | 1.001  | 0.161    | 16.1     | (8.863 to 25.269)   | 0.435 | 1.011  | (0.666 to 1.349)   |
| TND-MLMD5 | cg22934878 | 15 | 25227003 | 3.126 | 0.157 | 2.956 | -1.069 | 0.145    | 14.5     | (7.700 to 23.384)   | 0.426 | -1.079 | (-1.426 to -0.726) |
| BWS-MLMD4 | cg05894557 | 15 | 25227036 | 2.074 | 0.22  | 2.67  | 2.679  | 0.005    | 0.5      | (0.048 to 1.782)    | 0.127 | 2.706  | (2.101 to 3.304)   |
| TND-MLMD5 | cg05894557 | 15 | 25227036 | 2.137 | 0.236 | 3.297 | 4.873  | 5.97E-06 | 0.000597 | (1.72E-07 to 0.005) | 0.003 | 4.921  | (3.909 to 5.909)   |
| BWS-MLMD4 | cg14853933 | 15 | 25228929 | 1.533 | 0.244 | 2.415 | 3.573  | 0        | 0        | (0.001 to 0.225)    | 0.034 | 3.608  | (2.841 to 4.369)   |
| TND-MLMD5 | cg14853933 | 15 | 25228929 | 1.738 | 0.277 | 2.299 | 2.002  | 0.025    | 2.5      | (0.614 to 6.276)    | 0.278 | 2.021  | (1.532 to 2.504)   |
| BWS-MLMD4 | cg26410550 | 15 | 25229256 | 2.176 | 0.352 | 2.643 | 1.313  | 0.098    | 9.8      | (4.420 to 17.328)   | 0.39  | 1.326  | (0.941 to 1.704)   |
| TND-MLMD5 | cg26410550 | 15 | 25229256 | 2.259 | 0.204 | 3.001 | 3.597  | 0        | 0        | (0.001 to 0.211)    | 0.05  | 3.633  | (2.861 to 4.399)   |
| BWS-MLMD4 | cg02891726 | 15 | 25229522 | 2.482 | 0.193 | 3.041 | 2.866  | 0.003    | 0.3      | (0.021 to 1.202)    | 0.1   | 2.895  | (2.256 to 3.527)   |
| TND-MLMD5 | cg02891726 | 15 | 25229522 | 2.262 | 0.142 | 2.311 | 0.343  | 0.366    | 36.6     | (26.411 to 47.620)  | 0.485 | 0.347  | (0.060 to 0.631)   |

**Supplementary Table 11. Performance of CH-test in detecting hypomethylation at the GNAS locus in MLMD samples.** The table presents 450k DNA methylation data across *GNAS* region in TND-MLMD2 and BWS-MLMD4 samples. The point estimate represents the estimated percentage of the control population that would be expected to obtain lower score than the case and 95% confidence interval of point estimates were calculated from the noncentrality parameter from a noncentral t-distribution along with the point and interval estimates of the effect size. Here, ILMNID = Illumina Infinium HumanMethylation450 array probe ID, Chr = chromosome, Map information = genomic location (hg19), Mean = Control mean, and SD = control standard deviation, adjusted-p = Adjusted p-value using false discovery rate method,  $Z_{cc}$  = point estimate of the effect size.

| Case ID   | ILMNID     | Chr | Map Information | Control group |       | Case score | Significance test |          | Estimated percentage of the control population obtaining a lower score than the case |                     | Adjusted p | $Z_{cc}$ | Estimated effect size (95%CI) |
|-----------|------------|-----|-----------------|---------------|-------|------------|-------------------|----------|--------------------------------------------------------------------------------------|---------------------|------------|----------|-------------------------------|
|           |            |     |                 | Mean          | SD    |            | t-value           | p-value  | Point                                                                                | (95%CI)             |            |          |                               |
| BWS-MLMD4 | cg07050493 | 20  | 57392572        | 2.521         | 0.163 | 2.539      | 0.113             | 0.455    | 45.5                                                                                 | (34.778 to 56.547)  | 0.497      | 0.114    | (-0.165 to 0.391)             |
| TND-MLMD2 | cg07050493 | 20  | 57392572        | 2.713         | 0.158 | 2.821      | 0.678             | 0.25     | 25                                                                                   | (16.094 to 35.430)  | 0.457      | 0.685    | (0.374 to 0.991)              |
| BWS-MLMD4 | cg13869899 | 20  | 57392884        | 2.731         | 0.192 | 2.973      | 1.246             | 0.109    | 10.9                                                                                 | (5.185 to 18.871)   | 0.401      | 1.259    | (0.883 to 1.627)              |
| TND-MLMD2 | cg13869899 | 20  | 57392884        | 2.606         | 0.099 | 2.29       | -3.153            | 0.001    | 0.1                                                                                  | (0.005 to 0.630)    | 0.054      | -3.185   | (-3.869 to -2.495)            |
| BWS-MLMD4 | cg14977365 | 20  | 57392898        | 2.703         | 0.265 | 2.77       | 0.25              | 0.402    | 40.2                                                                                 | (29.718 to 51.225)  | 0.492      | 0.252    | (-0.031 to 0.533)             |
| TND-MLMD2 | cg14977365 | 20  | 57392898        | 2.703         | 0.248 | 2.468      | -0.938            | 0.176    | 17.6                                                                                 | (10.056 to 27.108)  | 0.428      | -0.947   | (-1.278 to -0.610)            |
| BWS-MLMD4 | cg25188071 | 20  | 57393277        | 2.371         | 0.215 | 1.799      | -2.637            | 0.006    | 0.6                                                                                  | (0.057 to 1.943)    | 0.134      | -2.663   | (-3.254 to -2.066)            |
| TND-MLMD2 | cg25188071 | 20  | 57393277        | 2.439         | 0.235 | 2.232      | -0.872            | 0.194    | 19.4                                                                                 | (11.417 to 29.108)  | 0.436      | -0.881   | (-1.205 to -0.550)            |
| BWS-MLMD4 | cg21983491 | 20  | 57393380        | 1.26          | 0.119 | 1.175      | -0.699            | 0.244    | 24.4                                                                                 | (15.533 to 34.708)  | 0.466      | -0.706   | (-1.014 to -0.393)            |
| TND-MLMD2 | cg21983491 | 20  | 57393380        | 1.455         | 0.096 | 1.597      | 1.46              | 0.075    | 7.5                                                                                  | (3.058 to 14.264)   | 0.342      | 1.474    | (1.069 to 1.872)              |
| BWS-MLMD4 | cg11954355 | 20  | 57393844        | -0.554        | 0.25  | -0.93      | -1.49             | 0.071    | 7.1                                                                                  | (2.822 to 13.677)   | 0.358      | -1.505   | (-1.908 to -1.095)            |
| TND-MLMD2 | cg11954355 | 20  | 57393844        | -0.086        | 0.294 | -0.511     | -1.43             | 0.08     | 8                                                                                    | (3.304 to 14.856)   | 0.348      | -1.444   | (-1.838 to -1.043)            |
| BWS-MLMD4 | cg03030267 | 20  | 57394000        | 1.19          | 0.405 | 0.808      | -0.935            | 0.177    | 17.7                                                                                 | (10.119 to 27.202)  | 0.442      | -0.944   | (-1.275 to -0.607)            |
| TND-MLMD2 | cg03030267 | 20  | 57394000        | 1.604         | 0.361 | 1.002      | -1.653            | 0.052    | 5.2                                                                                  | (1.801 to 10.836)   | 0.302      | -1.67    | (-2.097 to -1.235)            |
| BWS-MLMD4 | cg15428904 | 20  | 57394097        | 2.268         | 0.262 | 2.566      | 1.131             | 0.132    | 13.2                                                                                 | (6.728 to 21.723)   | 0.418      | 1.143    | (0.782 to 1.496)              |
| TND-MLMD2 | cg15428904 | 20  | 57394097        | 2.514         | 0.2   | 2.576      | 0.302             | 0.382    | 38.2                                                                                 | (27.843 to 49.195)  | 0.486      | 0.305    | (0.020 to 0.587)              |
| BWS-MLMD4 | cg10309886 | 20  | 57407747        | -1.724        | 0.191 | -1.008     | 3.702             | 0        | 0                                                                                    | (0.000 to 0.160)    | 0.027      | 3.739    | (2.948 to 4.524)              |
| TND-MLMD2 | cg10309886 | 20  | 57407747        | -1.419        | 0.296 | -0.105     | 4.396             | 2.96E-05 | 0.00296                                                                              | (4.69E-06 to 0.022) | 0.007      | 4.439    | (3.518 to 5.338)              |
| BWS-MLMD4 | cg03613625 | 20  | 57408174        | 1.036         | 0.143 | 1.328      | 2.021             | 0.024    | 2.4                                                                                  | (0.576 to 6.078)    | 0.251      | 2.041    | (1.548 to 2.526)              |
| TND-MLMD2 | cg03613625 | 20  | 57408174        | 1.392         | 0.126 | 1.673      | 2.201             | 0.016    | 1.6                                                                                  | (0.309 to 4.452)    | 0.187      | 2.223    | (1.700 to 2.739)              |

|           |            |    |          |        |       |        |        |          |          |                        |          |        |                    |
|-----------|------------|----|----------|--------|-------|--------|--------|----------|----------|------------------------|----------|--------|--------------------|
| BWS-MLMD4 | cg23699918 | 20 | 57408730 | 0.266  | 0.1   | 0.581  | 3.132  | 0.001    | 0.1      | (0.006 to 0.662)       | 0.069    | 3.164  | (2.477 to 3.844)   |
| TND-MLMD2 | cg23699918 | 20 | 57408730 | 0.769  | 0.059 | 1.186  | 6.999  | 3.32E-09 | 3.32E-07 | (1.34E-15 to 1.03E-06) | 4.05E-06 | 7.069  | (5.606 to 8.460)   |
| BWS-MLMD4 | cg00636769 | 20 | 57408795 | 1.857  | 0.282 | 2.155  | 1.043  | 0.151    | 15.1     | (8.127 to 24.088)      | 0.43     | 1.054  | (0.703 to 1.397)   |
| TND-MLMD2 | cg00636769 | 20 | 57408795 | 2.129  | 0.274 | 2.44   | 1.123  | 0.133    | 13.3     | (6.846 to 21.930)      | 0.402    | 1.135  | (0.775 to 1.487)   |
| BWS-MLMD4 | cg26873158 | 20 | 57409309 | 1.967  | 0.211 | 2.108  | 0.661  | 0.256    | 25.6     | (16.549 to 36.009)     | 0.469    | 0.668  | (0.358 to 0.972)   |
| TND-MLMD2 | cg26873158 | 20 | 57409309 | 2.159  | 0.175 | 2.501  | 1.932  | 0.03     | 3        | (0.772 to 7.039)       | 0.244    | 1.951  | (1.473 to 2.422)   |
| BWS-MLMD4 | cg16682926 | 20 | 57411775 | 2.798  | 0.237 | 3.063  | 1.103  | 0.138    | 13.8     | (7.151 to 22.458)      | 0.422    | 1.114  | (0.757 to 1.465)   |
| TND-MLMD2 | cg16682926 | 20 | 57411775 | 2.732  | 0.172 | 2.948  | 1.249  | 0.109    | 10.9     | (5.151 to 18.805)      | 0.382    | 1.261  | (0.885 to 1.630)   |
| BWS-MLMD4 | cg04780380 | 20 | 57412945 | 1.223  | 0.479 | 1.438  | 0.442  | 0.33     | 33       | (23.108 to 43.897)     | 0.483    | 0.447  | (0.154 to 0.735)   |
| TND-MLMD2 | cg04780380 | 20 | 57412945 | 1.738  | 0.304 | 1.873  | 0.44   | 0.331    | 33.1     | (23.161 to 43.959)     | 0.477    | 0.445  | (0.152 to 0.734)   |
| BWS-MLMD4 | cg07964163 | 20 | 57413417 | 0.977  | 0.21  | 1.077  | 0.472  | 0.32     | 32       | (22.154 to 42.796)     | 0.481    | 0.476  | (0.182 to 0.767)   |
| TND-MLMD2 | cg07964163 | 20 | 57413417 | 1.233  | 0.174 | 1.704  | 2.676  | 0.005    | 0.5      | (0.048 to 1.794)       | 0.106    | 2.703  | (2.098 to 3.301)   |
| BWS-MLMD4 | cg10459054 | 20 | 57413436 | 2.476  | 0.178 | 2.6    | 0.692  | 0.246    | 24.6     | (15.718 to 34.946)     | 0.466    | 0.699  | (0.387 to 1.006)   |
| TND-MLMD2 | cg10459054 | 20 | 57413436 | 2.49   | 0.139 | 2.762  | 1.928  | 0.03     | 3        | (0.781 to 7.083)       | 0.245    | 1.947  | (1.470 to 2.417)   |
| BWS-MLMD4 | cg27642181 | 20 | 57413694 | 2.91   | 0.181 | 2.917  | 0.035  | 0.486    | 48.6     | (37.731 to 59.561)     | 0.499    | 0.035  | (-0.242 to 0.313)  |
| TND-MLMD2 | cg27642181 | 20 | 57413694 | 2.943  | 0.184 | 2.842  | -0.542 | 0.295    | 29.5     | (19.961 to 40.210)     | 0.469    | -0.548 | (-0.843 to -0.248) |
| BWS-MLMD4 | cg17071192 | 20 | 57413698 | 2.795  | 0.216 | 3.037  | 1.108  | 0.137    | 13.7     | (7.080 to 22.335)      | 0.421    | 1.119  | (0.761 to 1.470)   |
| TND-MLMD2 | cg17071192 | 20 | 57413698 | 2.871  | 0.175 | 2.833  | -0.214 | 0.416    | 41.6     | (31.016 to 52.611)     | 0.491    | -0.216 | (-0.495 to 0.066)  |
| BWS-MLMD4 | cg07434855 | 20 | 57413700 | 2.192  | 0.208 | 2.094  | -0.468 | 0.321    | 32.1     | (22.280 to 42.943)     | 0.481    | -0.472 | (-0.763 to -0.178) |
| TND-MLMD2 | cg07434855 | 20 | 57413700 | 2.16   | 0.143 | 1.799  | -2.494 | 0.008    | 0.8      | (0.102 to 2.584)       | 0.133    | -2.518 | (-3.084 to -1.946) |
| BWS-MLMD4 | cg04132853 | 20 | 57414039 | 0.284  | 0.18  | 0.541  | 1.417  | 0.081    | 8.1      | (3.411 to 15.106)      | 0.371    | 1.431  | (1.032 to 1.824)   |
| TND-MLMD2 | cg04132853 | 20 | 57414039 | 0.752  | 0.127 | 1.768  | 7.934  | 1.20E-10 | 1.20E-08 | (4.73E-20 to 9.98E-09) | 1.81E-07 | 8.013  | (6.362 to 9.583)   |
| BWS-MLMD4 | cg25090051 | 20 | 57414059 | 0.017  | 0.163 | 0.389  | 2.264  | 0.014    | 1.4      | (0.246 to 3.979)       | 0.203    | 2.286  | (1.753 to 2.812)   |
| TND-MLMD2 | cg25090051 | 20 | 57414059 | 0.428  | 0.12  | 1.165  | 6.068  | 9.20E-08 | 9.20E-06 | (1.06E-11 to 5.18E-05) | 8.03E-05 | 6.128  | (4.885 to 7.341)   |
| BWS-MLMD4 | cg00732970 | 20 | 57414162 | -0.583 | 0.107 | -0.4   | 1.697  | 0.048    | 4.8      | (1.589 to 10.159)      | 0.317    | 1.714  | (1.273 to 2.147)   |
| TND-MLMD2 | cg00732970 | 20 | 57414162 | 0.123  | 0.11  | 0.971  | 7.599  | 3.94E-10 | 3.94E-08 | (2.15E-18 to 5.61E-08) | 5.42E-07 | 7.675  | (6.091 to 9.180)   |
| BWS-MLMD4 | cg17696847 | 20 | 57414217 | -0.118 | 0.218 | -0.071 | 0.214  | 0.416    | 41.6     | (31.011 to 52.606)     | 0.493    | 0.216  | (-0.065 to 0.496)  |
| TND-MLMD2 | cg17696847 | 20 | 57414217 | 0.365  | 0.143 | 1.045  | 4.716  | 1.02E-05 | 0.00102  | (5.29E-07 to 0.008)    | 0.004    | 4.763  | (3.780 to 5.721)   |
| BWS-MLMD4 | cg23732978 | 20 | 57414274 | 0.423  | 0.624 | 1.201  | 1.235  | 0.111    | 11.1     | (5.319 to 19.132)      | 0.402    | 1.248  | (0.873 to 1.615)   |
| TND-MLMD2 | cg23732978 | 20 | 57414274 | 0.749  | 0.64  | 1.266  | 0.8    | 0.214    | 21.4     | (13.048 to 31.398)     | 0.444    | 0.807  | (0.485 to 1.124)   |
| BWS-MLMD4 | cg20019489 | 20 | 57414351 | 0.727  | 0.318 | 0.924  | 0.614  | 0.271    | 27.1     | (17.858 to 37.650)     | 0.472    | 0.62   | (0.315 to 0.921)   |

|           |            |    |          |        |       |        |        |          |          |                        |          |        |                    |
|-----------|------------|----|----------|--------|-------|--------|--------|----------|----------|------------------------|----------|--------|--------------------|
| TND-MLMD2 | cg20019489 | 20 | 57414351 | 1.16   | 0.217 | 1.949  | 3.605  | 0        | 0        | (0.001 to 0.207)       | 0.028    | 3.64   | (2.867 to 4.408)   |
| BWS-MLMD4 | cg02274728 | 20 | 57414407 | 0.044  | 0.126 | 0.402  | 2.818  | 0.003    | 0.3      | (0.026 to 1.333)       | 0.107    | 2.846  | (2.216 to 3.469)   |
| TND-MLMD2 | cg02274728 | 20 | 57414407 | 0.49   | 0.137 | 1.382  | 6.447  | 2.39E-08 | 2.39E-06 | (3.19E-13 to 1.03E-05) | 2.46E-05 | 6.511  | (5.194 to 7.796)   |
| BWS-MLMD4 | cg12054318 | 20 | 57414529 | 0.081  | 0.1   | 0.221  | 1.39   | 0.085    | 8.5      | (3.660 to 15.679)      | 0.377    | 1.403  | (1.008 to 1.792)   |
| TND-MLMD2 | cg12054318 | 20 | 57414529 | 0.433  | 0.15  | 1.253  | 5.423  | 8.94E-07 | 8.94E-05 | (2.55E-09 to 0.001)    | 0.001    | 5.477  | (4.358 to 6.568)   |
| BWS-MLMD4 | cg11996914 | 20 | 57414578 | 0.15   | 0.109 | -0.171 | -2.904 | 0.003    | 0.3      | (0.018 to 1.107)       | 0.095    | -2.933 | (-3.572 to -2.288) |
| TND-MLMD2 | cg11996914 | 20 | 57414578 | 0.202  | 0.127 | 0.589  | 3.03   | 0.002    | 0.2      | (0.010 to 0.837)       | 0.064    | 3.06   | (2.392 to 3.722)   |
| BWS-MLMD4 | cg21330323 | 20 | 57414596 | -0.006 | 0.108 | -0.343 | -3.097 | 0.002    | 0.2      | (0.007 to 0.718)       | 0.073    | -3.128 | (-3.801 to -2.448) |
| TND-MLMD2 | cg21330323 | 20 | 57414596 | 0.06   | 0.144 | 0.28   | 1.516  | 0.068    | 6.8      | (2.637 to 13.201)      | 0.331    | 1.531  | (1.117 to 1.937)   |
| BWS-MLMD4 | cg06163629 | 20 | 57414884 | 0.045  | 0.144 | -0.182 | -1.555 | 0.063    | 6.3      | (2.370 to 12.488)      | 0.346    | -1.571 | (-1.983 to -1.151) |
| TND-MLMD2 | cg06163629 | 20 | 57414884 | -0.011 | 0.14  | 0.46   | 3.343  | 0.001    | 0.1      | (0.002 to 0.401)       | 0.041    | 3.376  | (2.652 to 4.095)   |
| BWS-MLMD4 | cg14597908 | 20 | 57414960 | -0.2   | 0.084 | -0.287 | -1.024 | 0.155    | 15.5     | (8.451 to 24.613)      | 0.432    | -1.035 | (-1.375 to -0.687) |
| TND-MLMD2 | cg14597908 | 20 | 57414960 | 0.211  | 0.128 | 0.783  | 4.404  | 2.89E-05 | 0.00289  | (4.45E-06 to 0.021)    | 0.007    | 4.447  | (3.524 to 5.348)   |
| BWS-MLMD4 | cg00765653 | 20 | 57415144 | 0.265  | 0.128 | -0.013 | -2.147 | 0.018    | 1.8      | (0.374 to 4.897)       | 0.225    | -2.168 | (-2.675 to -1.655) |
| TND-MLMD2 | cg00765653 | 20 | 57415144 | 0.314  | 0.122 | 0.753  | 3.548  | 0        | 0        | (0.001 to 0.240)       | 0.03     | 3.583  | (2.820 to 4.340)   |
| BWS-MLMD4 | cg14728235 | 20 | 57415177 | 0.234  | 0.123 | -0.025 | -2.079 | 0.021    | 2.1      | (0.474 to 5.512)       | 0.239    | -2.099 | (-2.594 to -1.597) |
| TND-MLMD2 | cg14728235 | 20 | 57415177 | 0.356  | 0.13  | 0.669  | 2.386  | 0.01     | 1        | (0.156 to 3.175)       | 0.152    | 2.41   | (1.856 to 2.957)   |
| BWS-MLMD4 | cg05558390 | 20 | 57415377 | -0.753 | 0.146 | -0.931 | -1.207 | 0.117    | 11.7     | (5.679 to 19.817)      | 0.407    | -1.219 | (-1.582 to -0.848) |
| TND-MLMD2 | cg05558390 | 20 | 57415377 | -0.669 | 0.186 | -0.142 | 2.81   | 0.004    | 0.4      | (0.027 to 1.357)       | 0.088    | 2.838  | (2.209 to 3.459)   |
| BWS-MLMD4 | cg19296354 | 20 | 57415697 | -0.04  | 0.132 | 0.065  | 0.782  | 0.219    | 21.9     | (13.461 to 31.963)     | 0.458    | 0.79   | (0.469 to 1.105)   |
| TND-MLMD2 | cg19296354 | 20 | 57415697 | 0.331  | 0.173 | 0.976  | 3.7    | 0        | 0        | (0.000 to 0.161)       | 0.024    | 3.736  | (2.946 to 4.521)   |
| BWS-MLMD4 | cg24975842 | 20 | 57416221 | -0.197 | 0.118 | -0.409 | -1.786 | 0.04     | 4        | (1.217 to 8.867)       | 0.299    | -1.804 | (-2.252 to -1.349) |
| TND-MLMD2 | cg24975842 | 20 | 57416221 | -0.022 | 0.182 | 0.347  | 2.012  | 0.025    | 2.5      | (0.594 to 6.173)       | 0.226    | 2.032  | (1.540 to 2.515)   |
| BWS-MLMD4 | cg18619398 | 20 | 57416506 | -0.095 | 0.104 | -0.055 | 0.386  | 0.351    | 35.1     | (24.971 to 46.014)     | 0.486    | 0.39   | (0.100 to 0.675)   |
| TND-MLMD2 | cg18619398 | 20 | 57416506 | 0.112  | 0.132 | 0.469  | 2.684  | 0.005    | 0.5      | (0.047 to 1.764)       | 0.104    | 2.711  | (2.105 to 3.310)   |
| BWS-MLMD4 | cg00952145 | 20 | 57417152 | -0.651 | 0.097 | -0.59  | 0.615  | 0.271    | 27.1     | (17.844 to 37.632)     | 0.472    | 0.621  | (0.315 to 0.921)   |
| TND-MLMD2 | cg00952145 | 20 | 57417152 | -0.238 | 0.161 | 0.438  | 4.16   | 6.39E-05 | 0.00639  | (1.96E-05 to 0.044)    | 0.011    | 4.202  | (3.324 to 5.073)   |
| BWS-MLMD4 | cg20582984 | 20 | 57417233 | 0.252  | 0.127 | 0.198  | -0.423 | 0.337    | 33.7     | (23.744 to 44.626)     | 0.484    | -0.427 | (-0.715 to -0.135) |
| TND-MLMD2 | cg20582984 | 20 | 57417233 | 0.874  | 0.165 | 1.675  | 4.804  | 7.56E-06 | 0.000756 | (2.83E-07 to 0.006)    | 0.003    | 4.852  | (3.852 to 5.827)   |
| BWS-MLMD4 | cg18949315 | 20 | 57418015 | -0.035 | 0.139 | -0.119 | -0.598 | 0.276    | 27.6     | (18.338 to 38.241)     | 0.473    | -0.603 | (-0.903 to -0.299) |
| TND-MLMD2 | cg18949315 | 20 | 57418015 | 0.391  | 0.119 | 1.298  | 7.521  | 5.20E-10 | 5.20E-08 | (5.15E-18 to 8.32E-08) | 7.05E-07 | 7.595  | (6.028 to 9.086)   |

|           |            |    |          |        |       |        |        |          |          |                        |          |        |                     |
|-----------|------------|----|----------|--------|-------|--------|--------|----------|----------|------------------------|----------|--------|---------------------|
| BWS-MLMD4 | cg14943539 | 20 | 57420942 | 1.126  | 0.231 | 1.088  | -0.161 | 0.436    | 43.6     | (32.958 to 54.657)     | 0.495    | -0.163 | (-0.441 to 0.117)   |
| TND-MLMD2 | cg14943539 | 20 | 57420942 | 1.522  | 0.159 | 1.802  | 1.753  | 0.043    | 4.3      | (1.345 to 9.329)       | 0.281    | 1.771  | (1.321 to 2.213)    |
| BWS-MLMD4 | cg21779904 | 20 | 57425157 | -0.414 | 0.109 | -0.004 | 3.73   | 0        | 0        | (0.000 to 0.149)       | 0.025    | 3.767  | (2.971 to 4.557)    |
| TND-MLMD2 | cg21779904 | 20 | 57425157 | -0.014 | 0.187 | 0.498  | 2.712  | 0.005    | 0.5      | (0.041 to 1.667)       | 0.101    | 2.739  | (2.128 to 3.343)    |
| BWS-MLMD4 | cg03547757 | 20 | 57425515 | 1.422  | 0.196 | 1.3    | -0.617 | 0.27     | 27       | (17.790 to 37.565)     | 0.472    | -0.623 | (-0.923 to -0.317)  |
| TND-MLMD2 | cg03547757 | 20 | 57425515 | 1.64   | 0.21  | 1.191  | -2.116 | 0.02     | 2        | (0.417 to 5.168)       | 0.204    | -2.137 | (-2.638 to -1.629)  |
| BWS-MLMD4 | cg18935491 | 20 | 57425979 | 0.244  | 0.122 | -0.341 | -4.731 | 9.66E-06 | 0.000966 | (4.74E-07 to 0.007)    | 0.003    | -4.778 | (-5.740 to -3.793)  |
| TND-MLMD2 | cg18935491 | 20 | 57425979 | 0.186  | 0.158 | -0.769 | -5.977 | 1.27E-07 | 1.27E-05 | (2.37E-11 to 7.52E-05) | 0        | -6.037 | (-7.233 to -4.811)  |
| BWS-MLMD4 | cg24203465 | 20 | 57425986 | 0.049  | 0.097 | -0.165 | -2.192 | 0.017    | 1.7      | (0.319 to 4.527)       | 0.216    | -2.214 | (-2.728 to -1.693)  |
| TND-MLMD2 | cg24203465 | 20 | 57425986 | 0.417  | 0.149 | -0.739 | -7.704 | 2.72E-10 | 2.72E-08 | (6.63E-19 to 3.29E-08) | 3.87E-07 | -7.781 | (-9.306 to -6.176)  |
| BWS-MLMD4 | cg26102503 | 20 | 57425994 | -0.171 | 0.148 | -0.419 | -1.663 | 0.051    | 5.1      | (1.753 to 10.687)      | 0.324    | -1.679 | (-2.108 to -1.243)  |
| TND-MLMD2 | cg26102503 | 20 | 57425994 | 0.293  | 0.21  | -1.036 | -6.259 | 4.66E-08 | 4.66E-06 | (1.85E-12 to 2.32E-05) | 4.50E-05 | -6.321 | (-7.571 to -5.041)  |
| BWS-MLMD4 | cg03344105 | 20 | 57426131 | -0.131 | 0.083 | -0.517 | -4.582 | 1.60E-05 | 0.0016   | (1.34E-06 to 0.012)    | 0.004    | -4.627 | (-5.561 to -3.670)  |
| TND-MLMD2 | cg03344105 | 20 | 57426131 | 0.307  | 0.158 | -0.932 | -7.772 | 2.14E-10 | 2.14E-08 | (3.07E-19 to 2.33E-08) | 3.07E-07 | -7.849 | (-9.388 to -6.230)  |
| BWS-MLMD4 | cg14660776 | 20 | 57426138 | -0.376 | 0.082 | -0.633 | -3.125 | 0.001    | 0.1      | (0.006 to 0.674)       | 0.069    | -3.156 | (-3.834 to -2.471)  |
| TND-MLMD2 | cg14660776 | 20 | 57426138 | -0.019 | 0.134 | -1.298 | -9.459 | 6.17E-13 | 6.17E-11 | (1.74E-28 to 1.57E-12) | 1.29E-09 | -9.553 | (-11.416 to -7.593) |
| BWS-MLMD4 | cg19592829 | 20 | 57426215 | -0.07  | 0.082 | -0.333 | -3.191 | 0.001    | 0.1      | (0.005 to 0.577)       | 0.063    | -3.223 | (-3.914 to -2.526)  |
| TND-MLMD2 | cg19592829 | 20 | 57426215 | 0.288  | 0.12  | -0.464 | -6.185 | 6.07E-08 | 6.07E-06 | (3.67E-12 to 3.18E-05) | 5.68E-05 | -6.246 | (-7.482 to -4.980)  |
| BWS-MLMD4 | cg20401058 | 20 | 57426240 | -0.317 | 0.105 | -0.965 | -6.102 | 8.16E-08 | 8.16E-06 | (7.79E-12 to 4.50E-05) | 7.70E-05 | -6.162 | (-7.382 to -4.912)  |
| TND-MLMD2 | cg20401058 | 20 | 57426240 | 0.149  | 0.199 | -1.383 | -7.641 | 3.39E-10 | 3.39E-08 | (1.34E-18 to 4.53E-08) | 4.71E-07 | -7.718 | (-9.231 to -6.125)  |
| BWS-MLMD4 | cg11669839 | 20 | 57426322 | -0.418 | 0.093 | -0.81  | -4.172 | 6.15E-05 | 0.00615  | (1.82E-05 to 0.043)    | 0.011    | -4.213 | (-5.087 to -3.334)  |
| TND-MLMD2 | cg11669839 | 20 | 57426322 | -0.011 | 0.129 | -1.069 | -8.146 | 5.73E-11 | 5.73E-09 | (3.90E-21 to 3.23E-09) | 9.03E-08 | -8.227 | (-9.837 to -6.533)  |
| BWS-MLMD4 | cg17841572 | 20 | 57426368 | -0.311 | 0.094 | -0.59  | -2.939 | 0.003    | 0.3      | (0.015 to 1.025)       | 0.091    | -2.969 | (-3.614 to -2.317)  |
| TND-MLMD2 | cg17841572 | 20 | 57426368 | 0.108  | 0.132 | -1.04  | -8.63  | 1.06E-11 | 1.06E-09 | (1.02E-23 to 2.20E-10) | 1.84E-08 | -8.716 | (-10.419 to -6.923) |
| BWS-MLMD4 | cg08166863 | 20 | 57426391 | 0.116  | 0.134 | -0.206 | -2.383 | 0.011    | 1.1      | (0.157 to 3.190)       | 0.179    | -2.407 | (-2.954 to -1.854)  |
| TND-MLMD2 | cg08166863 | 20 | 57426391 | 0.119  | 0.139 | -0.572 | -4.918 | 5.12E-06 | 0.000512 | (1.23E-07 to 0.004)    | 0.002    | -4.967 | (-5.963 to -3.946)  |
| BWS-MLMD4 | cg06200857 | 20 | 57426420 | 0.125  | 0.329 | -0.252 | -1.137 | 0.131    | 13.1     | (6.650 to 21.585)      | 0.418    | -1.148 | (-1.502 to -0.786)  |
| TND-MLMD2 | cg06200857 | 20 | 57426420 | 0.628  | 0.368 | -1.009 | -4.4   | 2.92E-05 | 0.00292  | (4.56E-06 to 0.021)    | 0.007    | -4.444 | (-5.344 to -3.521)  |
| BWS-MLMD4 | cg08091561 | 20 | 57426425 | -0.031 | 0.354 | -0.356 | -0.909 | 0.184    | 18.4     | (10.647 to 27.987)     | 0.445    | -0.918 | (-1.246 to -0.583)  |
| TND-MLMD2 | cg08091561 | 20 | 57426425 | 0.48   | 0.391 | -1.121 | -4.06  | 8.83E-05 | 0.00883  | (3.67E-05 to 0.059)    | 0.013    | -4.1   | (-4.952 to -3.242)  |
| BWS-MLMD4 | cg22860367 | 20 | 57426538 | -0.343 | 0.09  | -1.039 | -7.648 | 3.31E-10 | 3.31E-08 | (1.25E-18 to 4.38E-08) | 5.67E-07 | -7.724 | (-9.239 to -6.130)  |



|           |            |    |          |        |       |        |         |          |          |                        |          |         |                      |
|-----------|------------|----|----------|--------|-------|--------|---------|----------|----------|------------------------|----------|---------|----------------------|
| TND-MLMD2 | cg22860367 | 20 | 57426538 | 0.185  | 0.131 | -1.63  | -13.743 | 0        | 0        | (5.63E-60 to 1.13E-26) | 0        | -13.88  | (-16.571 to -11.047) |
| BWS-MLMD4 | cg07947033 | 20 | 57426545 | 0.016  | 0.268 | -0.304 | -1.183  | 0.121    | 12.1     | (5.992 to 20.400)      | 0.411    | -1.195  | (-1.555 to -0.827)   |
| TND-MLMD2 | cg07947033 | 20 | 57426545 | 0.01   | 0.256 | -1.445 | -5.616  | 4.55E-07 | 4.55E-05 | (5.26E-10 to 0.000)    | 0        | -5.671  | (-6.799 to -4.516)   |
| BWS-MLMD4 | cg06693667 | 20 | 57426570 | 0.033  | 0.087 | -0.133 | -1.884  | 0.033    | 3.3      | (0.900 to 7.607)       | 0.28     | -1.902  | (-2.366 to -1.432)   |
| TND-MLMD2 | cg06693667 | 20 | 57426570 | 0.45   | 0.12  | -0.832 | -10.571 | 1.54E-14 | 1.54E-12 | (1.48E-35 to 1.03E-15) | 3.82E-11 | -10.677 | (-12.754 to -8.490)  |
| BWS-MLMD4 | cg15631127 | 20 | 57426580 | 0.129  | 0.113 | -0.269 | -3.489  | 0.001    | 0.1      | (0.001 to 0.278)       | 0.039    | -3.524  | (-4.269 to -2.772)   |
| TND-MLMD2 | cg15631127 | 20 | 57426580 | 0.159  | 0.108 | -0.419 | -5.314  | 1.31E-06 | 0.000131 | (6.09E-09 to 0.001)    | 0.001    | -5.366  | (-6.437 to -4.269)   |
| BWS-MLMD4 | cg23484981 | 20 | 57426626 | -0.218 | 0.722 | -0.826 | -0.833  | 0.204    | 20.4     | (12.272 to 30.323)     | 0.454    | -0.842  | (-1.161 to -0.515)   |
| TND-MLMD2 | cg23484981 | 20 | 57426626 | 0.155  | 0.359 | -1.515 | -4.606  | 1.47E-05 | 0.00147  | (1.13E-06 to 0.011)    | 0.005    | -4.652  | (-5.590 to -3.690)   |
| BWS-MLMD4 | cg04677683 | 20 | 57426743 | -0.106 | 0.207 | -0.353 | -1.184  | 0.121    | 12.1     | (5.983 to 20.383)      | 0.41     | -1.196  | (-1.556 to -0.828)   |
| TND-MLMD2 | cg04677683 | 20 | 57426743 | 0.326  | 0.247 | -1.512 | -7.37   | 8.87E-10 | 8.87E-08 | (2.66E-17 to 1.75E-07) | 1.18E-06 | -7.444  | (-8.905 to -5.906)   |
| BWS-MLMD4 | cg15160445 | 20 | 57426749 | 0.255  | 0.26  | 0.023  | -0.885  | 0.19     | 19       | (11.137 to 28.704)     | 0.448    | -0.894  | (-1.219 to -0.562)   |
| TND-MLMD2 | cg15160445 | 20 | 57426749 | 0.706  | 0.243 | -1.206 | -7.804  | 1.91E-10 | 1.91E-08 | (2.13E-19 to 1.97E-08) | 2.76E-07 | -7.881  | (-9.426 to -6.256)   |
| BWS-MLMD4 | cg25326570 | 20 | 57426757 | 0.112  | 0.232 | -0.465 | -2.46   | 0.009    | 0.9      | (0.117 to 2.759)       | 0.165    | -2.484  | (-3.044 to -1.918)   |
| TND-MLMD2 | cg25326570 | 20 | 57426757 | 0.543  | 0.22  | -1.411 | -8.781  | 6.26E-12 | 6.26E-10 | (1.47E-24 to 9.22E-11) | 1.12E-08 | -8.869  | (-10.601 to -7.046)  |
| BWS-MLMD4 | cg23249369 | 20 | 57426759 | 0.257  | 0.155 | -0.458 | -4.561  | 1.71E-05 | 0.00171  | (1.55E-06 to 0.013)    | 0.005    | -4.606  | (-5.536 to -3.653)   |
| TND-MLMD2 | cg23249369 | 20 | 57426759 | 0.299  | 0.168 | -1.794 | -12.338 | 0        | 0        | (2.22E-48 to 1.79E-21) | 0        | -12.461 | (-14.880 to -9.915)  |
| BWS-MLMD4 | cg01715551 | 20 | 57426789 | -0.185 | 0.094 | -0.788 | -6.345  | 3.43E-08 | 3.43E-06 | (8.34E-13 to 1.60E-05) | 3.70E-05 | -6.408  | (-7.674 to -5.111)   |
| TND-MLMD2 | cg01715551 | 20 | 57426789 | 0.174  | 0.13  | -1.262 | -10.954 | 4.44E-15 | 4.44E-13 | (3.66E-38 to 6.94E-17) | 1.20E-11 | -11.062 | (-13.214 to -8.798)  |
| BWS-MLMD4 | cg14176797 | 20 | 57426801 | -0.073 | 0.084 | -0.651 | -6.845  | 5.77E-09 | 5.77E-07 | (6.48E-15 to 2.11E-06) | 7.42E-06 | -6.913  | (-8.274 to -5.481)   |
| TND-MLMD2 | cg14176797 | 20 | 57426801 | 0.367  | 0.125 | -1.229 | -12.596 | 0        | 0        | (2.06E-50 to 2.20E-22) | 0        | -12.721 | (-15.190 to -10.122) |
| BWS-MLMD4 | cg04457481 | 20 | 57426835 | 0      | 0.093 | -0.958 | -10.154 | 6.04E-14 | 6.04E-12 | (8.19E-33 to 1.77E-14) | 1.91E-10 | -10.255 | (-12.252 to -8.154)  |
| TND-MLMD2 | cg04457481 | 20 | 57426835 | 0.309  | 0.135 | -1.886 | -16.15  | 0        | 0        | (1.02E-82 to 7.33E-37) | 0        | -16.311 | (-19.468 to -12.986) |
| BWS-MLMD4 | cg21938532 | 20 | 57426931 | 0.102  | 0.143 | -0.766 | -6.023  | 1.08E-07 | 1.08E-05 | (1.57E-11 to 6.22E-05) | 9.68E-05 | -6.083  | (-7.288 to -4.848)   |
| TND-MLMD2 | cg21938532 | 20 | 57426931 | 0.119  | 0.154 | -2.124 | -14.416 | 0        | 0        | (5.78E-66 to 2.34E-29) | 0        | -14.559 | (-17.381 to -11.589) |
| BWS-MLMD4 | cg03606258 | 20 | 57426935 | -0.2   | 1.383 | -0.706 | -0.362  | 0.359    | 35.9     | (25.777 to 46.916)     | 0.487    | -0.366  | (-0.650 to -0.077)   |
| TND-MLMD2 | cg03606258 | 20 | 57426935 | 0.344  | 1.171 | -1.666 | -1.7    | 0.048    | 4.8      | (1.575 to 10.115)      | 0.293    | -1.717  | (-2.151 to -1.275)   |
| BWS-MLMD4 | cg22989942 | 20 | 57426950 | 0.16   | 0.118 | -0.598 | -6.347  | 3.41E-08 | 3.41E-06 | (8.18E-13 to 1.59E-05) | 3.68E-05 | -6.41   | (-7.676 to -5.112)   |
| TND-MLMD2 | cg22989942 | 20 | 57426950 | 0.294  | 0.135 | -1.458 | -12.812 | 0        | 0        | (3.73E-52 to 3.64E-23) | 0        | -12.94  | (-15.451 to -10.297) |
| BWS-MLMD4 | cg14309385 | 20 | 57427010 | 0.098  | 0.114 | -0.305 | -3.51   | 0        | 0        | (0.001 to 0.264)       | 0.037    | -3.545  | (-4.294 to -2.789)   |
| TND-MLMD2 | cg14309385 | 20 | 57427010 | 0.172  | 0.124 | -0.986 | -9.215  | 1.42E-12 | 1.42E-10 | (4.90E-27 to 7.04E-12) | 2.84E-09 | -9.306  | (-11.122 to -7.395)  |

|           |            |    |          |        |       |        |         |          |          |                        |          |         |                      |
|-----------|------------|----|----------|--------|-------|--------|---------|----------|----------|------------------------|----------|---------|----------------------|
| BWS-MLMD4 | cg05309239 | 20 | 57427017 | -0.078 | 0.108 | -0.65  | -5.229  | 1.76E-06 | 0.000176 | (1.18E-08 to 0.001)    | 0.001    | -5.281  | (-6.336 to -4.200)   |
| TND-MLMD2 | cg05309239 | 20 | 57427017 | -0.017 | 0.158 | -1.874 | -11.608 | 5.55E-16 | 5.55E-14 | (7.69E-43 to 5.50E-19) | 1.70E-12 | -11.723 | (-14.001 to -9.326)  |
| BWS-MLMD4 | cg12573482 | 20 | 57427030 | -0.306 | 0.09  | -0.765 | -5.035  | 3.43E-06 | 0.000343 | (5.19E-08 to 0.003)    | 0.001    | -5.085  | (-6.104 to -4.041)   |
| TND-MLMD2 | cg12573482 | 20 | 57427030 | 0.183  | 0.122 | -1.782 | -15.982 | 0        | 0        | (5.11E-81 to 4.23E-36) | 0        | -16.141 | (-19.267 to -12.851) |
| BWS-MLMD4 | cg06324048 | 20 | 57427103 | 0.035  | 0.129 | -1.137 | -8.983  | 3.12E-12 | 3.12E-10 | (1.07E-25 to 2.82E-11) | 7.09E-09 | -9.073  | (-10.844 to -7.209)  |
| TND-MLMD2 | cg06324048 | 20 | 57427103 | 0.453  | 0.207 | -2.402 | -13.629 | 0        | 0        | (5.50E-59 to 3.14E-26) | 0        | -13.765 | (-16.434 to -10.955) |
| BWS-MLMD4 | cg13728472 | 20 | 57427117 | -0.388 | 0.132 | -1.027 | -4.806  | 7.50E-06 | 0.00075  | (2.78E-07 to 0.006)    | 0.003    | -4.854  | (-5.829 to -3.854)   |
| TND-MLMD2 | cg13728472 | 20 | 57427117 | -0.285 | 0.194 | -1.775 | -7.6    | 3.92E-10 | 3.92E-08 | (2.13E-18 to 5.58E-08) | 5.41E-07 | -7.676  | (-9.182 to -6.092)   |
| BWS-MLMD4 | cg24617313 | 20 | 57427146 | -0.192 | 0.625 | -0.359 | -0.265  | 0.396    | 39.6     | (29.185 to 50.651)     | 0.491    | -0.267  | (-0.548 to 0.016)    |
| TND-MLMD2 | cg24617313 | 20 | 57427146 | -0.09  | 0.593 | -1.994 | -3.18   | 0.001    | 0.1      | (0.005 to 0.592)       | 0.052    | -3.212  | (-3.900 to -2.517)   |
| BWS-MLMD4 | cg03908391 | 20 | 57427170 | 0.306  | 0.174 | -0.536 | -4.781  | 8.16E-06 | 0.000816 | (3.33E-07 to 0.006)    | 0.003    | -4.829  | (-5.799 to -3.833)   |
| TND-MLMD2 | cg03908391 | 20 | 57427170 | 0.269  | 0.224 | -1.69  | -8.66   | 9.51E-12 | 9.51E-10 | (6.90E-24 to 1.85E-10) | 1.67E-08 | -8.747  | (-10.456 to -6.948)  |
| BWS-MLMD4 | cg22290117 | 20 | 57427173 | 0.213  | 0.157 | -0.544 | -4.763  | 8.66E-06 | 0.000866 | (3.78E-07 to 0.007)    | 0.003    | -4.811  | (-5.778 to -3.819)   |
| TND-MLMD2 | cg22290117 | 20 | 57427173 | 0.612  | 0.194 | -1.151 | -8.999  | 2.95E-12 | 2.95E-10 | (8.63E-26 to 2.56E-11) | 5.60E-09 | -9.089  | (-10.863 to -7.222)  |
| BWS-MLMD4 | cg26496204 | 20 | 57427210 | 0.011  | 0.132 | -0.623 | -4.759  | 8.80E-06 | 0.00088  | (3.91E-07 to 0.007)    | 0.003    | -4.806  | (-5.772 to -3.815)   |
| TND-MLMD2 | cg26496204 | 20 | 57427210 | 0.46   | 0.169 | -1.542 | -11.745 | 4.44E-16 | 4.44E-14 | (7.38E-44 to 1.92E-19) | 1.37E-12 | -11.862 | (-14.166 to -9.437)  |
| BWS-MLMD4 | cg16833551 | 20 | 57427237 | 0.797  | 0.19  | -0.179 | -5.075  | 2.99E-06 | 0.000299 | (3.85E-08 to 0.002)    | 0.001    | -5.125  | (-6.151 to -4.074)   |
| TND-MLMD2 | cg16833551 | 20 | 57427237 | 1.199  | 0.186 | -1.433 | -13.979 | 0        | 0        | (4.84E-62 to 1.34E-27) | 0        | -14.118 | (-16.855 to -11.237) |
| BWS-MLMD4 | cg03010274 | 20 | 57427274 | -0.403 | 0.114 | -1.076 | -5.861  | 1.92E-07 | 1.92E-05 | (6.57E-11 to 0.000)    | 0        | -5.919  | (-7.093 to -4.716)   |
| TND-MLMD2 | cg03010274 | 20 | 57427274 | 0.009  | 0.173 | -1.723 | -9.922  | 1.30E-13 | 1.30E-11 | (2.46E-31 to 8.16E-14) | 2.91E-10 | -10.021 | (-11.973 to -7.967)  |
| BWS-MLMD4 | cg25652859 | 20 | 57427412 | -0.814 | 0.191 | -1.321 | -2.626  | 0.006    | 0.6      | (0.060 to 1.987)       | 0.136    | -2.652  | (-3.241 to -2.056)   |
| TND-MLMD2 | cg25652859 | 20 | 57427412 | -0.412 | 0.314 | -2.592 | -6.872  | 5.24E-09 | 5.24E-07 | (4.92E-15 to 1.86E-06) | 6.14E-06 | -6.94   | (-8.307 to -5.503)   |
| BWS-MLMD4 | cg12321149 | 20 | 57427426 | -0.724 | 0.184 | -0.999 | -1.478  | 0.073    | 7.3      | (2.918 to 13.919)      | 0.361    | -1.492  | (-1.893 to -1.084)   |
| TND-MLMD2 | cg12321149 | 20 | 57427426 | -0.318 | 0.247 | -2.161 | -7.398  | 8.04E-10 | 8.04E-08 | (1.97E-17 to 1.53E-07) | 1.08E-06 | -7.472  | (-8.939 to -5.929)   |
| BWS-MLMD4 | cg27304369 | 20 | 57427483 | -0.314 | 0.215 | -1.209 | -4.118  | 7.32E-05 | 0.00732  | (2.55E-05 to 0.050)    | 0.012    | -4.159  | (-5.022 to -3.290)   |
| TND-MLMD2 | cg27304369 | 20 | 57427483 | -0.32  | 0.244 | -2.749 | -9.874  | 1.53E-13 | 1.53E-11 | (4.91E-31 to 1.11E-13) | 3.38E-10 | -9.973  | (-11.916 to -7.928)  |
| BWS-MLMD4 | cg26811638 | 20 | 57427493 | -0.522 | 0.178 | -1.234 | -3.967  | 0        | 0        | (6.45E-05 to 0.077)    | 0.016    | -4.006  | (-4.841 to -3.166)   |
| TND-MLMD2 | cg26811638 | 20 | 57427493 | -0.452 | 0.251 | -2.256 | -7.105  | 2.28E-09 | 2.28E-07 | (4.48E-16 to 6.29E-07) | 2.85E-06 | -7.176  | (-8.586 to -5.692)   |
| BWS-MLMD4 | cg26534489 | 20 | 57427495 | -0.318 | 0.149 | -0.794 | -3.174  | 0.001    | 0.1      | (0.005 to 0.601)       | 0.065    | -3.205  | (-3.893 to -2.512)   |
| TND-MLMD2 | cg26534489 | 20 | 57427495 | -0.287 | 0.188 | -1.464 | -6.212  | 5.51E-08 | 5.51E-06 | (2.86E-12 to 2.83E-05) | 5.23E-05 | -6.274  | (-7.514 to -5.002)   |
| BWS-MLMD4 | cg08587534 | 20 | 57427503 | -0.02  | 0.163 | -0.653 | -3.837  | 0        | 0        | (0.000 to 0.111)       | 0.021    | -3.875  | (-4.686 to -3.059)   |

|           |            |    |          |        |       |        |         |          |          |                        |          |         |                      |
|-----------|------------|----|----------|--------|-------|--------|---------|----------|----------|------------------------|----------|---------|----------------------|
| TND-MLMD2 | cg08587534 | 20 | 57427503 | 0.013  | 0.174 | -1.671 | -9.572  | 4.21E-13 | 4.21E-11 | (3.62E-29 to 7.72E-13) | 8.88E-10 | -9.667  | (-11.552 to -7.684)  |
| BWS-MLMD4 | cg04257105 | 20 | 57427713 | -0.346 | 0.19  | -0.909 | -2.931  | 0.003    | 0.3      | (0.016 to 1.044)       | 0.092    | -2.96   | (-3.603 to -2.310)   |
| TND-MLMD2 | cg04257105 | 20 | 57427713 | -0.26  | 0.244 | -1.756 | -6.073  | 9.03E-08 | 9.03E-06 | (1.01E-11 to 5.07E-05) | 7.93E-05 | -6.133  | (-7.348 to -4.889)   |
| BWS-MLMD4 | cg20528838 | 20 | 57427730 | -0.959 | 0.196 | -1.43  | -2.378  | 0.011    | 1.1      | (0.160 to 3.221)       | 0.18     | -2.402  | (-2.948 to -1.849)   |
| TND-MLMD2 | cg20528838 | 20 | 57427730 | -0.868 | 0.272 | -2.556 | -6.139  | 7.13E-08 | 7.13E-06 | (5.54E-12 to 3.84E-05) | 6.48E-05 | -6.201  | (-7.427 to -4.943)   |
| BWS-MLMD4 | cg27661264 | 20 | 57427738 | -0.979 | 0.186 | -1.413 | -2.309  | 0.013    | 1.3      | (0.208 to 3.661)       | 0.193    | -2.332  | (-2.866 to -1.791)   |
| TND-MLMD2 | cg27661264 | 20 | 57427738 | -0.579 | 0.267 | -2.315 | -6.436  | 2.48E-08 | 2.48E-06 | (3.55E-13 to 1.08E-05) | 2.55E-05 | -6.5    | (-7.783 to -5.185)   |
| BWS-MLMD4 | cg19589727 | 20 | 57427762 | -0.935 | 0.171 | -1.203 | -1.555  | 0.063    | 6.3      | (2.372 to 12.494)      | 0.346    | -1.57   | (-1.982 to -1.151)   |
| TND-MLMD2 | cg19589727 | 20 | 57427762 | -0.578 | 0.252 | -2.209 | -6.399  | 2.84E-08 | 2.84E-06 | (5.04E-13 to 1.27E-05) | 2.86E-05 | -6.462  | (-7.738 to -5.155)   |
| BWS-MLMD4 | cg10302550 | 20 | 57427821 | -0.286 | 0.168 | -1.025 | -4.348  | 3.46E-05 | 0.00346  | (5.84E-06 to 0.025)    | 0.007    | -4.391  | (-5.298 to -3.479)   |
| TND-MLMD2 | cg10302550 | 20 | 57427821 | -0.239 | 0.24  | -2.109 | -7.722  | 2.55E-10 | 2.55E-08 | (5.39E-19 to 3.00E-08) | 3.64E-07 | -7.799  | (-9.328 to -6.190)   |
| BWS-MLMD4 | cg17414107 | 20 | 57427830 | -0.201 | 0.21  | -0.864 | -3.122  | 0.002    | 0.2      | (0.006 to 0.677)       | 0.07     | -3.154  | (-3.832 to -2.469)   |
| TND-MLMD2 | cg17414107 | 20 | 57427830 | 0.244  | 0.306 | -2.334 | -8.337  | 2.93E-11 | 2.93E-09 | (3.88E-22 to 1.14E-09) | 4.81E-08 | -8.42   | (-10.067 to -6.687)  |
| BWS-MLMD4 | cg00943909 | 20 | 57427942 | -0.286 | 0.177 | -1.012 | -4.071  | 8.52E-05 | 0.00852  | (3.42E-05 to 0.058)    | 0.013    | -4.111  | (-4.966 to -3.251)   |
| TND-MLMD2 | cg00943909 | 20 | 57427942 | -0.181 | 0.247 | -2.137 | -7.825  | 1.77E-10 | 1.77E-08 | (1.68E-19 to 1.77E-08) | 2.57E-07 | -7.902  | (-9.451 to -6.273)   |
| BWS-MLMD4 | cg19640589 | 20 | 57427973 | -0.135 | 0.21  | -0.848 | -3.359  | 0.001    | 0.1      | (0.002 to 0.386)       | 0.048    | -3.392  | (-4.113 to -2.664)   |
| TND-MLMD2 | cg19640589 | 20 | 57427973 | -0.046 | 0.258 | -2.332 | -8.786  | 6.17E-12 | 6.17E-10 | (1.39E-24 to 8.99E-11) | 1.11E-08 | -8.873  | (-10.606 to -7.049)  |
| BWS-MLMD4 | cg24346429 | 20 | 57428032 | -0.336 | 0.21  | -0.543 | -0.978  | 0.166    | 16.6     | (9.287 to 25.933)      | 0.437    | -0.988  | (-1.323 to -0.645)   |
| TND-MLMD2 | cg24346429 | 20 | 57428032 | 0.198  | 0.207 | -0.112 | -1.481  | 0.072    | 7.2      | (2.889 to 13.846)      | 0.338    | -1.496  | (-1.897 to -1.087)   |
| BWS-MLMD4 | cg24058407 | 20 | 57428282 | 1.482  | 0.236 | 1.387  | -0.398  | 0.346    | 34.6     | (24.546 to 45.535)     | 0.485    | -0.402  | (-0.689 to -0.112)   |
| TND-MLMD2 | cg24058407 | 20 | 57428282 | 1.569  | 0.142 | 1.234  | -2.339  | 0.012    | 1.2      | (0.186 to 3.468)       | 0.161    | -2.362  | (-2.901 to -1.816)   |
| BWS-MLMD4 | cg21809160 | 20 | 57428309 | 2.789  | 0.183 | 2.737  | -0.276  | 0.392    | 39.2     | (28.760 to 50.192)     | 0.491    | -0.279  | (-0.560 to 0.005)    |
| TND-MLMD2 | cg21809160 | 20 | 57428309 | 2.834  | 0.127 | 2.505  | -2.566  | 0.007    | 0.7      | (0.076 to 2.243)       | 0.122    | -2.591  | (-3.170 to -2.006)   |
| BWS-MLMD4 | cg09583957 | 20 | 57428315 | 1.947  | 0.327 | 2.24   | 0.887   | 0.19     | 19       | (11.088 to 28.634)     | 0.448    | 0.896   | (0.564 to 1.222)     |
| TND-MLMD2 | cg09583957 | 20 | 57428315 | 2.02   | 0.242 | 1.56   | -1.883  | 0.033    | 3.3      | (0.901 to 7.613)       | 0.254    | -1.902  | (-2.365 to -1.432)   |
| BWS-MLMD4 | cg25367568 | 20 | 57428437 | 1.121  | 0.188 | 0.605  | -2.717  | 0.005    | 0.5      | (0.040 to 1.648)       | 0.121    | -2.744  | (-3.350 to -2.133)   |
| TND-MLMD2 | cg25367568 | 20 | 57428437 | 1.361  | 0.161 | 1.138  | -1.375  | 0.088    | 8.8      | (3.800 to 15.992)      | 0.359    | -1.388  | (-1.774 to -0.995)   |
| BWS-MLMD4 | cg21988465 | 20 | 57429277 | 0.174  | 0.144 | -0.643 | -5.622  | 4.45E-07 | 4.45E-05 | (4.98E-10 to 0.000)    | 0        | -5.678  | (-6.807 to -4.521)   |
| TND-MLMD2 | cg21988465 | 20 | 57429277 | 0.326  | 0.18  | -2.352 | -14.713 | 0        | 0        | (1.05E-68 to 1.39E-30) | 0        | -14.86  | (-17.739 to -11.829) |
| BWS-MLMD4 | cg07284407 | 20 | 57429858 | -0.007 | 0.133 | -0.594 | -4.384  | 3.08E-05 | 0.00308  | (5.07E-06 to 0.023)    | 0.007    | -4.427  | (-5.324 to -3.508)   |
| TND-MLMD2 | cg07284407 | 20 | 57429858 | 0.434  | 0.164 | -1.774 | -13.331 | 0        | 0        | (1.90E-56 to 4.32E-25) | 0        | -13.464 | (-16.075 to -10.715) |

|           |            |    |          |        |       |        |         |          |          |                        |          |         |                      |
|-----------|------------|----|----------|--------|-------|--------|---------|----------|----------|------------------------|----------|---------|----------------------|
| BWS-MLMD4 | cg21625881 | 20 | 57430313 | 0.281  | 0.113 | -0.153 | -3.797  | 0        | 0        | (0.000 to 0.124)       | 0.023    | -3.835  | (-4.638 to -3.026)   |
| TND-MLMD2 | cg21625881 | 20 | 57430313 | 0.518  | 0.134 | -1.171 | -12.526 | 0        | 0        | (7.44E-50 to 3.91E-22) | 0        | -12.65  | (-15.106 to -10.066) |
| BWS-MLMD4 | cg14203179 | 20 | 57430663 | 0.01   | 0.125 | -0.404 | -3.277  | 0.001    | 0.1      | (0.003 to 0.470)       | 0.055    | -3.31   | (-4.016 to -2.597)   |
| TND-MLMD2 | cg14203179 | 20 | 57430663 | 0.038  | 0.176 | -1.608 | -9.282  | 1.13E-12 | 1.13E-10 | (1.98E-27 to 4.68E-12) | 2.27E-09 | -9.374  | (-11.203 to -7.450)  |
| BWS-MLMD4 | cg09437522 | 20 | 57431202 | -0.49  | 0.117 | -0.944 | -3.83   | 0        | 0        | (0.000 to 0.113)       | 0.021    | -3.868  | (-4.677 to -3.053)   |
| TND-MLMD2 | cg09437522 | 20 | 57431202 | 0.003  | 0.157 | -2.196 | -13.88  | 0        | 0        | (3.62E-61 to 3.31E-27) | 0        | -14.018 | (-16.735 to -11.157) |
| BWS-MLMD4 | cg10468484 | 20 | 57431303 | -0.17  | 0.117 | -0.8   | -5.324  | 1.26E-06 | 0.000126 | (5.61E-09 to 0.001)    | 0.001    | -5.377  | (-6.450 to -4.277)   |
| TND-MLMD2 | cg10468484 | 20 | 57431303 | -0.001 | 0.145 | -2.068 | -14.095 | 0        | 0        | (4.46E-63 to 4.60E-28) | 0        | -14.236 | (-16.995 to -11.331) |
| BWS-MLMD4 | cg15122327 | 20 | 57435146 | 2.563  | 0.294 | 2.67   | 0.361   | 0.36     | 36       | (25.793 to 46.933)     | 0.487    | 0.365   | (0.077 to 0.650)     |
| TND-MLMD2 | cg15122327 | 20 | 57435146 | 2.692  | 0.198 | 3.108  | 2.078   | 0.021    | 2.1      | (0.475 to 5.520)       | 0.212    | 2.098   | (1.596 to 2.593)     |
| BWS-MLMD4 | cg10797197 | 20 | 57444000 | 0.081  | 0.184 | -0.196 | -1.494  | 0.071    | 7.1      | (2.796 to 13.612)      | 0.357    | -1.509  | (-1.912 to -1.098)   |
| TND-MLMD2 | cg10797197 | 20 | 57444000 | 0.065  | 0.181 | 0.258  | 1.052   | 0.149    | 14.9     | (7.982 to 23.852)      | 0.413    | 1.062   | (0.711 to 1.406)     |
| BWS-MLMD4 | cg01565918 | 20 | 57457492 | 3.445  | 0.275 | 3.637  | 0.692   | 0.246    | 24.6     | (15.740 to 34.975)     | 0.466    | 0.698   | (0.386 to 1.005)     |
| TND-MLMD2 | cg01565918 | 20 | 57457492 | 3.344  | 0.163 | 3.54   | 1.186   | 0.121    | 12.1     | (5.957 to 20.336)      | 0.392    | 1.198   | (0.830 to 1.558)     |
| BWS-MLMD4 | cg27484541 | 20 | 57461542 | 2.983  | 0.293 | 3.038  | 0.186   | 0.426    | 42.6     | (32.024 to 53.677)     | 0.494    | 0.188   | (-0.092 to 0.467)    |
| TND-MLMD2 | cg27484541 | 20 | 57461542 | 3.012  | 0.213 | 3.187  | 0.815   | 0.21     | 21       | (12.690 to 30.905)     | 0.442    | 0.823   | (0.499 to 1.141)     |
| BWS-MLMD4 | cg17658854 | 20 | 57462798 | 2.046  | 0.201 | 2.133  | 0.43    | 0.335    | 33.5     | (23.502 to 44.349)     | 0.484    | 0.434   | (0.142 to 0.722)     |
| TND-MLMD2 | cg17658854 | 20 | 57462798 | 2.22   | 0.126 | 2.133  | -0.683  | 0.249    | 24.9     | (15.961 to 35.259)     | 0.457    | -0.69   | (-0.996 to -0.378)   |
| BWS-MLMD4 | cg20782596 | 20 | 57462978 | 2.734  | 0.159 | 2.366  | -2.294  | 0.013    | 1.3      | (0.220 to 3.765)       | 0.196    | -2.317  | (-2.848 to -1.779)   |
| TND-MLMD2 | cg20782596 | 20 | 57462978 | 2.704  | 0.155 | 2.614  | -0.577  | 0.283    | 28.3     | (18.931 to 38.967)     | 0.466    | -0.583  | (-0.880 to -0.280)   |
| BWS-MLMD4 | cg24276988 | 20 | 57463106 | 2.373  | 0.252 | 2.084  | -1.136  | 0.131    | 13.1     | (6.658 to 21.600)      | 0.418    | -1.147  | (-1.502 to -0.786)   |
| TND-MLMD2 | cg24276988 | 20 | 57463106 | 2.499  | 0.285 | 2.191  | -1.071  | 0.145    | 14.5     | (7.664 to 23.325)      | 0.41     | -1.082  | (-1.428 to -0.728)   |
| BWS-MLMD4 | cg22741626 | 20 | 57463265 | 0.781  | 0.204 | 0.43   | -1.705  | 0.047    | 4.7      | (1.549 to 10.027)      | 0.316    | -1.722  | (-2.157 to -1.280)   |
| TND-MLMD2 | cg22741626 | 20 | 57463265 | 1.157  | 0.156 | 0.356  | -5.081  | 2.93E-06 | 0.000293 | (3.68E-08 to 0.002)    | 0.001    | -5.131  | (-6.158 to -4.079)   |
| BWS-MLMD4 | cg18997188 | 20 | 57463270 | 0.434  | 0.17  | 0.075  | -2.092  | 0.021    | 2.1      | (0.453 to 5.386)       | 0.236    | -2.113  | (-2.610 to -1.609)   |
| TND-MLMD2 | cg18997188 | 20 | 57463270 | 0.931  | 0.169 | -0.092 | -5.986  | 1.23E-07 | 1.23E-05 | (2.19E-11 to 7.25E-05) | 0        | -6.046  | (-7.243 to -4.818)   |
| BWS-MLMD4 | cg20213508 | 20 | 57463325 | 0.872  | 0.18  | 0.705  | -0.916  | 0.182    | 18.2     | (10.496 to 27.765)     | 0.444    | -0.925  | (-1.254 to -0.590)   |
| TND-MLMD2 | cg20213508 | 20 | 57463325 | 1.251  | 0.167 | 0.391  | -5.112  | 2.63E-06 | 0.000263 | (2.91E-08 to 0.002)    | 0.001    | -5.162  | (-6.195 to -4.104)   |
| BWS-MLMD4 | cg04779428 | 20 | 57463355 | 0.545  | 0.194 | 0.329  | -1.101  | 0.138    | 13.8     | (7.192 to 22.527)      | 0.422    | -1.112  | (-1.462 to -0.755)   |
| TND-MLMD2 | cg04779428 | 20 | 57463355 | 0.968  | 0.181 | 0.002  | -5.273  | 1.51E-06 | 0.000151 | (8.40E-09 to 0.001)    | 0.001    | -5.325  | (-6.388 to -4.236)   |
| BWS-MLMD4 | cg04019914 | 20 | 57463357 | 0.805  | 0.192 | 0.934  | 0.668   | 0.254    | 25.4     | (16.373 to 35.786)     | 0.468    | 0.675   | (0.364 to 0.979)     |

|           |            |    |          |        |       |        |         |          |          |                        |          |         |                      |
|-----------|------------|----|----------|--------|-------|--------|---------|----------|----------|------------------------|----------|---------|----------------------|
| TND-MLMD2 | cg04019914 | 20 | 57463357 | 1.224  | 0.144 | 0.603  | -4.258  | 4.65E-05 | 0.00465  | (1.05E-05 to 0.033)    | 0.009    | -4.3    | (-5.190 to -3.404)   |
| BWS-MLMD4 | cg11357538 | 20 | 57463397 | 0.043  | 0.092 | -0.441 | -5.198  | 1.95E-06 | 0.000195 | (1.50E-08 to 0.001)    | 0.001    | -5.25   | (-6.299 to -4.175)   |
| TND-MLMD2 | cg11357538 | 20 | 57463397 | 0.437  | 0.111 | -1.335 | -15.741 | 0        | 0        | (1.33E-78 to 5.12E-35) | 0        | -15.898 | (-18.977 to -12.657) |
| BWS-MLMD4 | cg20008140 | 20 | 57463455 | -0.073 | 0.201 | -0.291 | -1.074  | 0.144    | 14.4     | (7.614 to 23.241)      | 0.426    | -1.085  | (-1.432 to -0.731)   |
| TND-MLMD2 | cg20008140 | 20 | 57463455 | 0.376  | 0.245 | -0.866 | -5.016  | 3.66E-06 | 0.000366 | (5.97E-08 to 0.003)    | 0.002    | -5.066  | (-6.081 to -4.026)   |
| BWS-MLMD4 | cg11480267 | 20 | 57463503 | -0.072 | 0.238 | -0.458 | -1.608  | 0.057    | 5.7      | (2.050 to 11.584)      | 0.335    | -1.624  | (-2.044 to -1.196)   |
| TND-MLMD2 | cg11480267 | 20 | 57463503 | 0.251  | 0.345 | -1.392 | -4.719  | 1.01E-05 | 0.00101  | (5.19E-07 to 0.008)    | 0.004    | -4.765  | (-5.725 to -3.782)   |
| BWS-MLMD4 | cg10011623 | 20 | 57463527 | -0.53  | 0.107 | -0.938 | -3.791  | 0        | 0        | (0.000 to 0.126)       | 0.023    | -3.828  | (-4.630 to -3.021)   |
| TND-MLMD2 | cg10011623 | 20 | 57463527 | -0.027 | 0.208 | -1.466 | -6.846  | 5.74E-09 | 5.74E-07 | (6.39E-15 to 2.10E-06) | 6.67E-06 | -6.914  | (-8.276 to -5.482)   |
| BWS-MLMD4 | cg01748573 | 20 | 57463530 | -0.259 | 0.14  | -0.764 | -3.582  | 0        | 0        | (0.001 to 0.219)       | 0.033    | -3.618  | (-4.381 to -2.849)   |
| TND-MLMD2 | cg01748573 | 20 | 57463530 | 0.219  | 0.227 | -1.682 | -8.296  | 3.38E-11 | 3.38E-09 | (6.39E-22 to 1.43E-09) | 5.51E-08 | -8.378  | (-10.017 to -6.654)  |
| BWS-MLMD4 | cg17334845 | 20 | 57463572 | -0.227 | 0.096 | -0.628 | -4.138  | 6.86E-05 | 0.00686  | (2.25E-05 to 0.047)    | 0.011    | -4.179  | (-5.046 to -3.306)   |
| TND-MLMD2 | cg17334845 | 20 | 57463572 | 0.131  | 0.146 | -1.939 | -14.04  | 0        | 0        | (1.38E-62 to 7.63E-28) | 0        | -14.18  | (-16.929 to -11.287) |
| BWS-MLMD4 | cg26767990 | 20 | 57463615 | -0.103 | 0.114 | -0.568 | -4.026  | 9.83E-05 | 0.00983  | (4.51E-05 to 0.065)    | 0.014    | -4.066  | (-4.912 to -3.214)   |
| TND-MLMD2 | cg26767990 | 20 | 57463615 | -0.182 | 0.155 | -1.179 | -6.354  | 3.32E-08 | 3.32E-06 | (7.63E-13 to 1.54E-05) | 3.30E-05 | -6.418  | (-7.685 to -5.118)   |
| BWS-MLMD4 | cg17652507 | 20 | 57463653 | -0.376 | 0.155 | -0.914 | -3.441  | 0.001    | 0.1      | (0.001 to 0.314)       | 0.042    | -3.476  | (-4.212 to -2.733)   |
| TND-MLMD2 | cg17652507 | 20 | 57463653 | -0.141 | 0.211 | -2.131 | -9.34   | 9.22E-13 | 9.22E-11 | (8.89E-28 to 3.26E-12) | 1.88E-09 | -9.433  | (-11.273 to -7.497)  |
| BWS-MLMD4 | cg22407822 | 20 | 57463658 | -0.164 | 0.157 | -0.768 | -3.802  | 0        | 0        | (0.000 to 0.122)       | 0.022    | -3.84   | (-4.644 to -3.030)   |
| TND-MLMD2 | cg22407822 | 20 | 57463658 | -0.052 | 0.199 | -1.7   | -8.199  | 4.75E-11 | 4.75E-09 | (2.06E-21 to 2.42E-09) | 7.65E-08 | -8.281  | (-9.901 to -6.576)   |
| BWS-MLMD4 | cg07341934 | 20 | 57463711 | -0.146 | 0.119 | -0.505 | -2.996  | 0.002    | 0.2      | (0.012 to 0.903)       | 0.084    | -3.026  | (-3.681 to -2.364)   |
| TND-MLMD2 | cg07341934 | 20 | 57463711 | 0.466  | 0.194 | -1.338 | -9.198  | 1.50E-12 | 1.50E-10 | (6.10E-27 to 7.77E-12) | 2.94E-09 | -9.29   | (-11.102 to -7.382)  |
| BWS-MLMD4 | cg23496597 | 20 | 57463725 | -0.104 | 0.174 | -0.652 | -3.12   | 0.002    | 0.2      | (0.006 to 0.681)       | 0.07     | -3.151  | (-3.829 to -2.467)   |
| TND-MLMD2 | cg23496597 | 20 | 57463725 | 0.021  | 0.184 | -1.478 | -8.085  | 7.10E-11 | 7.10E-09 | (8.08E-21 to 4.49E-09) | 1.10E-07 | -8.165  | (-9.763 to -6.483)   |
| BWS-MLMD4 | cg25308079 | 20 | 57463763 | 0.201  | 0.111 | -0.249 | -3.997  | 0        | 0        | (5.37E-05 to 0.071)    | 0.015    | -4.037  | (-4.878 to -3.191)   |
| TND-MLMD2 | cg25308079 | 20 | 57463763 | 0.227  | 0.128 | -0.626 | -6.58   | 1.49E-08 | 1.49E-06 | (8.90E-14 to 5.72E-06) | 1.59E-05 | -6.645  | (-7.956 to -5.302)   |
| BWS-MLMD4 | cg03014008 | 20 | 57463767 | -0.242 | 0.164 | -0.783 | -3.271  | 0.001    | 0.1      | (0.003 to 0.478)       | 0.055    | -3.303  | (-4.009 to -2.592)   |
| BWS-MLMD4 | cg09772382 | 20 | 57463775 | 0.383  | 0.132 | -0.067 | -3.375  | 0.001    | 0.1      | (0.002 to 0.370)       | 0.047    | -3.409  | (-4.134 to -2.678)   |
| TND-MLMD2 | cg09772382 | 20 | 57463775 | 0.371  | 0.11  | -0.526 | -8.056  | 7.86E-11 | 7.86E-09 | (1.14E-20 to 5.24E-09) | 1.21E-07 | -8.136  | (-9.729 to -6.460)   |
| BWS-MLMD4 | cg15222215 | 20 | 57463783 | 0.046  | 0.132 | -0.441 | -3.662  | 0        | 0        | (0.000 to 0.178)       | 0.029    | -3.699  | (-4.476 to -2.915)   |
| TND-MLMD2 | cg15222215 | 20 | 57463783 | 0.095  | 0.174 | -1.332 | -8.131  | 6.03E-11 | 6.03E-09 | (4.65E-21 to 3.50E-09) | 9.44E-08 | -8.212  | (-9.819 to -6.521)   |
| BWS-MLMD4 | cg11244758 | 20 | 57463900 | -0.036 | 0.132 | -0.403 | -2.745  | 0.004    | 0.4      | (0.036 to 1.557)       | 0.117    | -2.772  | (-3.382 to -2.155)   |

|           |            |    |          |        |       |        |         |          |          |                        |          |         |                     |
|-----------|------------|----|----------|--------|-------|--------|---------|----------|----------|------------------------|----------|---------|---------------------|
| TND-MLMD2 | cg11244758 | 20 | 57463900 | 0.129  | 0.147 | -0.85  | -6.601  | 1.38E-08 | 1.38E-06 | (7.24E-14 to 5.20E-06) | 1.49E-05 | -6.667  | (-7.981 to -5.319)  |
| BWS-MLMD4 | cg18160880 | 20 | 57463903 | 0.587  | 0.134 | 0.077  | -3.78   | 0        | 0        | (0.000 to 0.130)       | 0.023    | -3.817  | (-4.617 to -3.012)  |
| TND-MLMD2 | cg18160880 | 20 | 57463903 | 0.731  | 0.147 | -0.715 | -9.721  | 2.55E-13 | 2.55E-11 | (4.42E-30 to 3.00E-13) | 5.51E-10 | -9.818  | (-11.731 to -7.804) |
| BWS-MLMD4 | cg05926269 | 20 | 57463906 | 0.688  | 0.141 | 0.292  | -2.778  | 0.004    | 0.4      | (0.031 to 1.451)       | 0.112    | -2.806  | (-3.422 to -2.183)  |
| TND-MLMD2 | cg05926269 | 20 | 57463906 | 0.793  | 0.148 | -0.703 | -10.008 | 9.79E-14 | 9.79E-12 | (7.03E-32 to 4.65E-14) | 2.23E-10 | -10.108 | (-12.076 to -8.036) |
| BWS-MLMD4 | cg03821543 | 20 | 57463925 | -0.018 | 0.171 | -0.587 | -3.287  | 0.001    | 0.1      | (0.003 to 0.459)       | 0.054    | -3.32   | (-4.028 to -2.605)  |
| TND-MLMD2 | cg03821543 | 20 | 57463925 | 0.022  | 0.179 | -1.618 | -9.074  | 2.29E-12 | 2.29E-10 | (3.21E-26 to 1.64E-11) | 4.37E-09 | -9.164  | (-10.953 to -7.282) |
| BWS-MLMD4 | cg01538522 | 20 | 57463974 | -0.632 | 0.129 | -0.842 | -1.607  | 0.057    | 5.7      | (2.054 to 11.597)      | 0.335    | -1.623  | (-2.043 to -1.195)  |
| TND-MLMD2 | cg01538522 | 20 | 57463974 | -0.1   | 0.199 | -1.653 | -7.729  | 2.49E-10 | 2.49E-08 | (5.01E-19 to 2.90E-08) | 3.56E-07 | -7.806  | (-9.336 to -6.196)  |
| BWS-MLMD4 | cg00267746 | 20 | 57463984 | -0.284 | 0.162 | -0.592 | -1.879  | 0.033    | 3.3      | (0.914 to 7.665)       | 0.281    | -1.898  | (-2.360 to -1.428)  |
| TND-MLMD2 | cg00267746 | 20 | 57463984 | -0.207 | 0.183 | -1.554 | -7.298  | 1.15E-09 | 1.15E-07 | (5.80E-17 to 2.49E-07) | 1.49E-06 | -7.371  | (-8.819 to -5.848)  |
| BWS-MLMD4 | cg09885502 | 20 | 57463991 | -0.12  | 1.632 | -0.437 | -0.192  | 0.424    | 42.4     | (31.812 to 53.453)     | 0.494    | -0.194  | (-0.473 to 0.087)   |
| TND-MLMD2 | cg09885502 | 20 | 57463991 | 0.119  | 1.812 | -0.872 | -0.542  | 0.295    | 29.5     | (19.987 to 40.241)     | 0.469    | -0.547  | (-0.842 to -0.247)  |
| BWS-MLMD4 | cg03837903 | 20 | 57464000 | 0.152  | 0.254 | -0.102 | -0.988  | 0.164    | 16.4     | (9.099 to 25.640)      | 0.436    | -0.998  | (-1.335 to -0.654)  |
| TND-MLMD2 | cg03837903 | 20 | 57464000 | 0.675  | 0.315 | -0.784 | -4.59   | 1.55E-05 | 0.00155  | (1.27E-06 to 0.012)    | 0.005    | -4.635  | (-5.570 to -3.677)  |
| BWS-MLMD4 | cg23159236 | 20 | 57464002 | -0.617 | 0.152 | -0.85  | -1.522  | 0.067    | 6.7      | (2.592 to 13.084)      | 0.352    | -1.537  | (-1.944 to -1.122)  |
| TND-MLMD2 | cg23159236 | 20 | 57464002 | -0.417 | 0.199 | -1.617 | -5.97   | 1.30E-07 | 1.30E-05 | (2.52E-11 to 7.74E-05) | 0        | -6.029  | (-7.224 to -4.805)  |
| BWS-MLMD4 | cg22798925 | 20 | 57464129 | 0.003  | 0.14  | -0.407 | -2.909  | 0.003    | 0.3      | (0.017 to 1.095)       | 0.094    | -2.938  | (-3.577 to -2.292)  |
| TND-MLMD2 | cg22798925 | 20 | 57464129 | 0.177  | 0.17  | -1.104 | -7.445  | 6.80E-10 | 6.80E-08 | (1.18E-17 to 1.21E-07) | 9.19E-07 | -7.519  | (-8.995 to -5.966)  |
| BWS-MLMD4 | cg20126878 | 20 | 57464571 | -0.235 | 0.094 | -0.64  | -4.247  | 4.82E-05 | 0.00482  | (1.13E-05 to 0.034)    | 0.009    | -4.289  | (-5.177 to -3.396)  |
| TND-MLMD2 | cg20126878 | 20 | 57464571 | 0.273  | 0.162 | -1.61  | -11.492 | 8.88E-16 | 8.88E-14 | (5.36E-42 to 1.32E-18) | 2.66E-12 | -11.607 | (-13.862 to -9.233) |
| BWS-MLMD4 | cg27027803 | 20 | 57464742 | 0.173  | 0.089 | -0.313 | -5.423  | 8.94E-07 | 8.94E-05 | (2.55E-09 to 0.001)    | 0.001    | -5.477  | (-6.568 to -4.358)  |
| TND-MLMD2 | cg27027803 | 20 | 57464742 | 0.635  | 0.173 | -1.505 | -12.258 | 0        | 0        | (9.38E-48 to 3.43E-21) | 0        | -12.38  | (-14.783 to -9.850) |
| BWS-MLMD4 | cg08997444 | 20 | 57464970 | 0.581  | 0.125 | 0.178  | -3.193  | 0.001    | 0.1      | (0.005 to 0.575)       | 0.063    | -3.224  | (-3.915 to -2.527)  |
| TND-MLMD2 | cg08997444 | 20 | 57464970 | 0.86   | 0.169 | -1.021 | -11.051 | 3.33E-15 | 3.33E-13 | (7.62E-39 to 3.43E-17) | 9.37E-12 | -11.161 | (-13.331 to -8.877) |
| BWS-MLMD4 | cg22639787 | 20 | 57464973 | 0.814  | 0.149 | 0.315  | -3.325  | 0.001    | 0.1      | (0.002 to 0.419)       | 0.051    | -3.358  | (-4.074 to -2.637)  |
| TND-MLMD2 | cg22639787 | 20 | 57464973 | 0.785  | 0.15  | -0.847 | -10.798 | 7.33E-15 | 7.33E-13 | (4.31E-37 to 2.10E-16) | 1.92E-11 | -10.905 | (-13.027 to -8.673) |
| BWS-MLMD4 | cg05960039 | 20 | 57465123 | -0.685 | 0.129 | -1.005 | -2.459  | 0.009    | 0.9      | (0.117 to 2.760)       | 0.165    | -2.484  | (-3.044 to -1.917)  |
| TND-MLMD2 | cg05960039 | 20 | 57465123 | -0.416 | 0.171 | -1.828 | -8.197  | 4.78E-11 | 4.78E-09 | (2.11E-21 to 2.45E-09) | 7.68E-08 | -8.279  | (-9.899 to -6.574)  |
| BWS-MLMD4 | cg09604333 | 20 | 57465125 | -0.213 | 0.104 | -0.6   | -3.677  | 0        | 0        | (0.000 to 0.171)       | 0.028    | -3.713  | (-4.494 to -2.927)  |
| TND-MLMD2 | cg09604333 | 20 | 57465125 | -0.091 | 0.13  | -1.1   | -7.656  | 3.22E-10 | 3.22E-08 | (1.14E-18 to 4.21E-08) | 4.49E-07 | -7.732  | (-9.248 to -6.137)  |

|           |            |    |          |        |       |        |         |          |          |                        |          |        |                     |
|-----------|------------|----|----------|--------|-------|--------|---------|----------|----------|------------------------|----------|--------|---------------------|
| BWS-MLMD4 | cg06047881 | 20 | 57465132 | -0.508 | 0.144 | -0.738 | -1.583  | 0.06     | 6        | (2.195 to 12.002)      | 0.34     | -1.599 | (-2.015 to -1.175)  |
| TND-MLMD2 | cg06047881 | 20 | 57465132 | 0.056  | 0.163 | -1.535 | -9.666  | 3.07E-13 | 3.07E-11 | (9.61E-30 to 4.25E-13) | 6.55E-10 | -9.762 | (-11.665 to -7.760) |
| BWS-MLMD4 | cg20018057 | 20 | 57465139 | -0.368 | 0.142 | -0.863 | -3.459  | 0.001    | 0.1      | (0.001 to 0.301)       | 0.041    | -3.493 | (-4.233 to -2.747)  |
| TND-MLMD2 | cg20018057 | 20 | 57465139 | 0.097  | 0.153 | -1.543 | -10.644 | 1.22E-14 | 1.22E-12 | (4.78E-36 to 6.20E-16) | 3.11E-11 | -10.75 | (-12.842 to -8.549) |
| BWS-MLMD4 | cg10748817 | 20 | 57465175 | 0.026  | 0.164 | -0.576 | -3.639  | 0        | 0        | (0.000 to 0.189)       | 0.03     | -3.676 | (-4.449 to -2.896)  |
| TND-MLMD2 | cg10748817 | 20 | 57465175 | 0.057  | 0.206 | -1.513 | -7.556  | 4.59E-10 | 4.59E-08 | (3.48E-18 to 6.97E-08) | 6.28E-07 | -7.631 | (-9.128 to -6.056)  |
| BWS-MLMD4 | cg25983380 | 20 | 57465439 | -1.253 | 0.377 | -2.104 | -2.238  | 0.015    | 1.5      | (0.270 to 4.170)       | 0.208    | -2.26  | (-2.782 to -1.731)  |
| TND-MLMD2 | cg25983380 | 20 | 57465439 | -1.211 | 0.515 | -2.949 | -3.345  | 0.001    | 0.1      | (0.002 to 0.399)       | 0.041    | -3.378 | (-4.097 to -2.653)  |
| BWS-MLMD4 | cg07909402 | 20 | 57465445 | -1.719 | 0.369 | -2.371 | -1.748  | 0.043    | 4.3      | (1.364 to 9.396)       | 0.307    | -1.766 | (-2.208 to -1.317)  |
| TND-MLMD2 | cg07909402 | 20 | 57465445 | -1.59  | 0.515 | -3.738 | -4.134  | 6.95E-05 | 0.00695  | (2.31E-05 to 0.048)    | 0.011    | -4.175 | (-5.042 to -3.303)  |
| BWS-MLMD4 | cg03264550 | 20 | 57465448 | -1.038 | 0.289 | -1.697 | -2.26   | 0.014    | 1.4      | (0.249 to 4.008)       | 0.204    | -2.282 | (-2.808 to -1.750)  |
| TND-MLMD2 | cg03264550 | 20 | 57465448 | -0.879 | 0.367 | -2.435 | -4.2    | 5.62E-05 | 0.00562  | (1.52E-05 to 0.039)    | 0.01     | -4.242 | (-5.121 to -3.357)  |
| BWS-MLMD4 | cg14104369 | 20 | 57465535 | -2.264 | 0.175 | -2.416 | -0.858  | 0.198    | 19.8     | (11.722 to 29.545)     | 0.451    | -0.867 | (-1.189 to -0.538)  |
| TND-MLMD2 | cg14104369 | 20 | 57465535 | -2.048 | 0.211 | -1.91  | 0.647   | 0.26     | 26       | (16.929 to 36.490)     | 0.46     | 0.654  | (0.345 to 0.957)    |
| BWS-MLMD4 | cg09241929 | 20 | 57465560 | -3.419 | 0.295 | -3.184 | 0.79    | 0.217    | 21.7     | (13.278 to 31.714)     | 0.458    | 0.798  | (0.476 to 1.113)    |
| TND-MLMD2 | cg09241929 | 20 | 57465560 | -3.395 | 0.289 | -3.253 | 0.487   | 0.314    | 31.4     | (21.673 to 42.235)     | 0.473    | 0.492  | (0.196 to 0.783)    |
| BWS-MLMD4 | cg10144604 | 20 | 57465599 | -3.201 | 0.198 | -3.275 | -0.368  | 0.357    | 35.7     | (25.556 to 46.669)     | 0.487    | -0.372 | (-0.657 to -0.084)  |
| TND-MLMD2 | cg10144604 | 20 | 57465599 | -3.06  | 0.176 | -3.022 | 0.213   | 0.416    | 41.6     | (31.035 to 52.631)     | 0.491    | 0.216  | (-0.066 to 0.495)   |
| BWS-MLMD4 | cg00466827 | 20 | 57465691 | -3.217 | 0.206 | -3.452 | -1.131  | 0.132    | 13.2     | (6.733 to 21.731)      | 0.418    | -1.142 | (-1.496 to -0.781)  |
| TND-MLMD2 | cg00466827 | 20 | 57465691 | -3.178 | 0.158 | -3.175 | 0.02    | 0.492    | 49.2     | (38.294 to 60.128)     | 0.499    | 0.021  | (-0.257 to 0.298)   |
| BWS-MLMD4 | cg18300848 | 20 | 57465695 | -3.594 | 0.227 | -3.935 | -1.491  | 0.071    | 7.1      | (2.819 to 13.669)      | 0.358    | -1.505 | (-1.908 to -1.095)  |
| TND-MLMD2 | cg18300848 | 20 | 57465695 | -3.513 | 0.229 | -3.304 | 0.905   | 0.185    | 18.5     | (10.717 to 28.091)     | 0.432    | 0.914  | (0.580 to 1.242)    |
| BWS-MLMD4 | cg07516978 | 20 | 57465773 | -3.596 | 0.324 | -3.708 | -0.34   | 0.368    | 36.8     | (26.530 to 47.752)     | 0.488    | -0.343 | (-0.627 to -0.056)  |
| BWS-MLMD4 | cg07824914 | 20 | 57465815 | -3.494 | 0.171 | -3.327 | 0.965   | 0.17     | 17       | (9.539 to 26.322)      | 0.439    | 0.974  | (0.633 to 1.308)    |
| TND-MLMD2 | cg07824914 | 20 | 57465815 | -3.541 | 0.192 | -3.678 | -0.711  | 0.24     | 24       | (15.223 to 34.304)     | 0.454    | -0.718 | (-1.027 to -0.404)  |
| BWS-MLMD4 | cg23143233 | 20 | 57465864 | -3.503 | 0.224 | -3.371 | 0.585   | 0.281    | 28.1     | (18.715 to 38.703)     | 0.474    | 0.59   | (0.287 to 0.888)    |
| TND-MLMD2 | cg23143233 | 20 | 57465864 | -3.568 | 0.234 | -3.911 | -1.45   | 0.077    | 7.7      | (3.134 to 14.450)      | 0.344    | -1.465 | (-1.861 to -1.060)  |
| BWS-MLMD4 | cg12372477 | 20 | 57465915 | -3.401 | 0.158 | -3.258 | 0.894   | 0.188    | 18.8     | (10.940 to 28.418)     | 0.447    | 0.903  | (0.570 to 1.230)    |
| TND-MLMD2 | cg12372477 | 20 | 57465915 | -3.598 | 0.202 | -3.551 | 0.231   | 0.409    | 40.9     | (30.403 to 51.958)     | 0.49     | 0.233  | (-0.049 to 0.513)   |
| BWS-MLMD4 | cg22885821 | 20 | 57465921 | -3.244 | 0.125 | -3.092 | 1.202   | 0.118    | 11.8     | (5.748 to 19.948)      | 0.408    | 1.214  | (0.843 to 1.576)    |
| TND-MLMD2 | cg22885821 | 20 | 57465921 | -3.196 | 0.102 | -3.228 | -0.313  | 0.378    | 37.8     | (27.471 to 48.788)     | 0.485    | -0.316 | (-0.599 to -0.030)  |

|           |            |    |          |        |       |        |        |       |      |                    |       |        |                    |
|-----------|------------|----|----------|--------|-------|--------|--------|-------|------|--------------------|-------|--------|--------------------|
| BWS-MLMD4 | cg21222634 | 20 | 57465926 | -3.53  | 0.323 | -3.707 | -0.544 | 0.294 | 29.4 | (19.919 to 40.159) | 0.477 | -0.549 | (-0.845 to -0.249) |
| TND-MLMD2 | cg21222634 | 20 | 57465926 | -3.612 | 0.144 | -3.738 | -0.865 | 0.196 | 19.6 | (11.565 to 29.321) | 0.437 | -0.874 | (-1.197 to -0.544) |
| BWS-MLMD4 | cg19002779 | 20 | 57465993 | -3.109 | 0.225 | -3.168 | -0.258 | 0.399 | 39.9 | (29.423 to 50.907) | 0.491 | -0.26  | (-0.541 to 0.023)  |
| TND-MLMD2 | cg19002779 | 20 | 57465993 | -2.798 | 0.186 | -2.791 | 0.035  | 0.486 | 48.6 | (37.732 to 59.562) | 0.499 | 0.035  | (-0.242 to 0.313)  |
| BWS-MLMD4 | cg16993684 | 20 | 57466131 | -4.393 | 0.493 | -4.483 | -0.18  | 0.429 | 42.9 | (32.266 to 53.931) | 0.494 | -0.182 | (-0.460 to 0.099)  |
| BWS-MLMD4 | cg18668503 | 20 | 57466137 | -3.003 | 0.372 | -2.746 | 0.684  | 0.249 | 24.9 | (15.945 to 35.238) | 0.467 | 0.691  | (0.379 to 0.997)   |
| TND-MLMD2 | cg18668503 | 20 | 57466137 | -2.864 | 0.29  | -3.262 | -1.358 | 0.09  | 9    | (3.962 to 16.351)  | 0.362 | -1.371 | (-1.755 to -0.980) |
| BWS-MLMD4 | cg09598225 | 20 | 57466839 | -3.417 | 0.13  | -3.308 | 0.828  | 0.206 | 20.6 | (12.380 to 30.474) | 0.454 | 0.837  | (0.511 to 1.156)   |
| TND-MLMD2 | cg09598225 | 20 | 57466839 | -3.363 | 0.125 | -3.418 | -0.435 | 0.333 | 33.3 | (23.325 to 44.147) | 0.477 | -0.44  | (-0.728 to -0.147) |
| BWS-MLMD4 | cg10003667 | 20 | 57466900 | -3.289 | 0.27  | -3.503 | -0.786 | 0.218 | 21.8 | (13.375 to 31.846) | 0.458 | -0.794 | (-1.109 to -0.472) |
| TND-MLMD2 | cg10003667 | 20 | 57466900 | -3.132 | 0.219 | -2.922 | 0.951  | 0.173 | 17.3 | (9.796 to 26.714)  | 0.426 | 0.961  | (0.621 to 1.293)   |
| BWS-MLMD4 | cg06147822 | 20 | 57466905 | -3.367 | 0.237 | -3.612 | -1.021 | 0.156 | 15.6 | (8.504 to 24.699)  | 0.433 | -1.031 | (-1.372 to -0.684) |
| TND-MLMD2 | cg06147822 | 20 | 57466905 | -3.299 | 0.225 | -3.61  | -1.365 | 0.089 | 8.9  | (3.892 to 16.197)  | 0.36  | -1.379 | (-1.763 to -0.986) |
| BWS-MLMD4 | cg13895966 | 20 | 57467268 | -2.917 | 0.265 | -2.962 | -0.167 | 0.434 | 43.4 | (32.754 to 54.444) | 0.495 | -0.168 | (-0.447 to 0.112)  |
| TND-MLMD2 | cg13895966 | 20 | 57467268 | -2.78  | 0.221 | -3.225 | -1.999 | 0.026 | 2.6  | (0.619 to 6.301)   | 0.229 | -2.019 | (-2.501 to -1.530) |
| BWS-MLMD4 | cg21971807 | 20 | 57471654 | 1.947  | 0.197 | 1.674  | -1.378 | 0.087 | 8.7  | (3.768 to 15.921)  | 0.378 | -1.392 | (-1.778 to -0.998) |
| TND-MLMD2 | cg21971807 | 20 | 57471654 | 2.105  | 0.212 | 2.119  | 0.061  | 0.476 | 47.6 | (36.738 to 58.554) | 0.497 | 0.062  | (-0.216 to 0.339)  |
| BWS-MLMD4 | cg11021321 | 20 | 57471660 | 1.79   | 0.176 | 1.279  | -2.868 | 0.003 | 0.3  | (0.021 to 1.197)   | 0.1   | -2.897 | (-3.529 to -2.258) |
| TND-MLMD2 | cg11021321 | 20 | 57471660 | 1.77   | 0.23  | 1.585  | -0.797 | 0.215 | 21.5 | (13.097 to 31.466) | 0.444 | -0.805 | (-1.122 to -0.483) |
| BWS-MLMD4 | cg05297437 | 20 | 57471672 | 2.244  | 0.19  | 1.846  | -2.066 | 0.022 | 2.2  | (0.494 to 5.629)   | 0.241 | -2.087 | (-2.580 to -1.587) |
| TND-MLMD2 | cg05297437 | 20 | 57471672 | 2.141  | 0.167 | 2.091  | -0.296 | 0.384 | 38.4 | (28.055 to 49.426) | 0.486 | -0.299 | (-0.581 to -0.014) |
| BWS-MLMD4 | cg00940140 | 20 | 57480494 | 2.478  | 0.278 | 2.315  | -0.583 | 0.281 | 28.1 | (18.761 to 38.759) | 0.474 | -0.589 | (-0.887 to -0.286) |
| TND-MLMD2 | cg00940140 | 20 | 57480494 | 2.647  | 0.258 | 2.372  | -1.052 | 0.149 | 14.9 | (7.980 to 23.848)  | 0.413 | -1.062 | (-1.406 to -0.711) |
| BWS-MLMD4 | cg14208013 | 20 | 57485765 | 3.145  | 0.245 | 3.427  | 1.144  | 0.129 | 12.9 | (6.542 to 21.395)  | 0.417 | 1.155  | (0.793 to 1.511)   |
| TND-MLMD2 | cg14208013 | 20 | 57485765 | 3.165  | 0.177 | 3.426  | 1.457  | 0.076 | 7.6  | (3.076 to 14.310)  | 0.343 | 1.472  | (1.067 to 1.870)   |
| BWS-MLMD4 | cg13353325 | 20 | 57485837 | 3.172  | 0.38  | 2.943  | -0.596 | 0.277 | 27.7 | (18.371 to 38.282) | 0.473 | -0.602 | (-0.901 to -0.298) |
| TND-MLMD2 | cg13353325 | 20 | 57485837 | 3.23   | 0.303 | 3.109  | -0.393 | 0.348 | 34.8 | (24.713 to 45.724) | 0.48  | -0.397 | (-0.684 to -0.107) |
| BWS-MLMD4 | cg20083839 | 20 | 57485940 | 1.705  | 0.345 | 1.494  | -0.605 | 0.274 | 27.4 | (18.124 to 37.979) | 0.473 | -0.611 | (-0.911 to -0.306) |
| TND-MLMD2 | cg20083839 | 20 | 57485940 | 1.776  | 0.203 | 1.73   | -0.221 | 0.413 | 41.3 | (30.754 to 52.332) | 0.49  | -0.223 | (-0.503 to 0.058)  |
| BWS-MLMD4 | cg26452915 | 20 | 57486076 | 1.188  | 0.259 | 1.85   | 2.531  | 0.007 | 0.7  | (0.088 to 2.403)   | 0.152 | 2.556  | (1.977 to 3.128)   |
| TND-MLMD2 | cg26452915 | 20 | 57486076 | 1.538  | 0.197 | 1.835  | 1.491  | 0.071 | 7.1  | (2.813 to 13.655)  | 0.336 | 1.506  | (1.096 to 1.909)   |
